# Supplementary material for: Hierarchical mode of evolution in freshwater SAR11 driven by species dispersal and lake history
Source: Research Square preprint supplement (doi:10.21203/rs.3.rs-8206985/v1), 2025-12-30
Supplement: Supplementary file 1 [file 1a92ac40e05ad747da8d5ae4.xlsx]

## Sheet: Index
Supplementary Data 1: Details for newly sequenced genomes.
Supplementary Data 2: List of publicly available and new genomes used for phylogenomic tree reconstruction.
Supplementary Data 3: Details on metagenomes used in this study.
Supplementary Data 4: InStrain genome-wide metric output for each of the three Fontibacterium species.
Supplementary Data 5: Statistical tests for nucleotide diverisity among the three Fontibacterium species.
Supplementary Data 6: Fixation index (FST) matrix scores calculated for F. temperatum and F. commune.
Supplementary Data 7: Metadata for isolation by distance analysis (IBD) and related statistics based on FST scores.
Supplementary Data 8: Relationship between ecosystem age and minor allele frequency (MAF) threshold.
Supplementary Data 9: pN/pS ratios and underlying polymorphism counts for all species and lake populations.

## Sheet: S1_Genome_details
Supplementary Data 1: Details for newly sequenced genomes.
Genome ID	Isolation site / Lake	Country	Coordinates	Isolation depth (m)	Isolation date	GTDB taxonomy	Taxonomy Fernandes et al. 2025	GC %	Genome size (bp)	# contigs	Circular chromosome	Total # CDS	Median size CDS (bp)	Mean size CDS (bp)	Total # tRNA	# 5S rRNA	# 16S rRNA	# 23S rRNA	Coding density (%)	Median intergenic spacer length (bp)	Mean intergenic spacer length (bp)	ENA accession number
GE-M12	Greifensee	Switzerland	47°22’ N 8°42’ E	5	07.11.2019	d__Bacteria;p__Pseudomonadota;c__Alphaproteobacteria;o__Pelagibacterales;f__Pelagibacteraceae;g__Fonsibacter;s__	Fontibacterium abundans	29.267	1118731	1	yes	1199	259	296.87	31	1	1	1	96.28	5	33.763	to be released after acceptance
GE-M19	Greifensee	Switzerland	47°22’ N 8°42’ E	5	07.11.2019	d__Bacteria;p__Pseudomonadota;c__Alphaproteobacteria;o__Pelagibacterales;f__Pelagibacteraceae;g__Fonsibacter;s__Fonsibacter sp000510845	Fontibacterium temperatum	29.558	1073873	1	yes	1162	256	292.36	32	1	1	1	95.77	6	37.9457	to be released after acceptance
MaE-M19	Maggiore	Italy	45°58’ N 8°39’ E	5	04.11.2019	d__Bacteria;p__Pseudomonadota;c__Alphaproteobacteria;o__Pelagibacterales;f__Pelagibacteraceae;g__Fonsibacter;s__Fonsibacter sp000510845	Fontibacterium temperatum	29.424	1074822	1	yes	1160	259.5	294.35	32	1	1	1	96.17	5	34.4749	to be released after acceptance
MiH-M21	Milada	Czech Republic	50°39'13"N, 13°56'40"E	5	23.07.2019	d__Bacteria;p__Pseudomonadota;c__Alphaproteobacteria;o__Pelagibacterales;f__Pelagibacteraceae;g__Fonsibacter;s__	Fontibacterium temperatum	29.303	1152143	1	yes	1241	257	294.58	31	1	1	1	96.01	6	36.1185	to be released after acceptance
MsE-M45	Most	Czech Republic	50°32'13"N, 13°38'40"E	5	01.10.2019	d__Bacteria;p__Pseudomonadota;c__Alphaproteobacteria;o__Pelagibacterales;f__Pelagibacteraceae;g__Fonsibacter;s__Fonsibacter sp947497305	Fontibacterium oligotrophicum	29.369	1097396	1	yes	1166	258.5	297.89	33	1	1	1	95.81	6	38.2748	to be released after acceptance
MsE-M49	Most	Czech Republic	50°32'13"N, 13°38'40"E	5	01.10.2019	d__Bacteria;p__Pseudomonadota;c__Alphaproteobacteria;o__Pelagibacterales;f__Pelagibacteraceae;g__Fonsibacter;s__Fonsibacter sp018882565	Fontibacterium medardense	29.182	1110265	2	no	1196	257	294.68	31	1	1	1	96.11	5	35.1718	to be released after acceptance
SlaE-M7	Slapy	Czech Republic	49°46' N, 14°25' E	5	19.05.2020	d__Bacteria;p__Pseudomonadota;c__Alphaproteobacteria;o__Pelagibacterales;f__Pelagibacteraceae;g__Fonsibacter;s__Fonsibacter sp018882565	Fontibacterium medardense	29.445	1092039	1	yes	1166	262	298.51	31	1	1	1	96.47	5	32.1902	to be released after acceptance
Primers designed to circularized genomes
Genome	Primer name	Sequence	Genome location	Length	# Off-target Sites	%GC	Hairpin Tm	Self Dimer Tm	Tm	Comments
SlaE-M7	SlaE-M7-f1	TGAACCGAAGCAGCGATGAT	1,091,679 F	20	0	50	None	4	60.1
SlaE-M7	SlaE-M7-f2	GGAATTTTCTACGCGGTCGG	1,091,137 F	20	0	55	40.7	12.5	59.4
SlaE-M7	SlaE-M7-r1	TCCAGTTTTTCCACCCGATGA	983 R	21	0	47.6	None	None	59.6
SlaE-M7	SlaE-M7-r2	GGCCAAGCAGGTCCTAACAT	190 R	20	0	55	40.6	None	60
MaE-M19	MaE-M19-f1	TCGCTTCATCAATCTGGCCT	1,074,667 F	20	0	50	None	3.3	59.5
MaE-M19	MaE-M19-f2	CCCTAACAGCCGTTTCACCT	1,071,292 F	20	0	55	36.5	None	60
MaE-M19	MaE-M19-r1	GCAGAGGTGTCTAGCCAAAA	637 R	20	0	50	None	None	57.8
MaE-M19	MaE-M19-r2	AGGATGGTATGGCCGCAATT	402 R	20	0	50	41.2	None	59.8
MiH-M21	MiH-M21-f1	CCACCGGTAGTGCAGTCTTT	1,149,623 F	20	0	55	45.8	6.9	60
MiH-M21	MiH-M21-f2	CATCTGGTGGTTCCATCCCC	1,148,748 F	20	0	60	46.1	None	60.1
MiH-M21	MiH-M21-f3	GCATCACGCATTGCAGCTAA	1,148,225 F	20	0	50	41.8	9.7	59.9
MiH-M21	MiH-M21-r1	TTACTTGGCTGCGGAAGACC	827 R	20	0	55	29.7	14.7	60.3
MiH-M21	MiH-M21-r2	CCTCCATGACTGATACCGCC	536 R	20	0	60	None	None	60
MiH-M21	MiH-M21-r3	CCTCCATGACTGATACCGCC	536 R	20	0	60	None	None	60
MiH-M21	MiH-M21-f4	AAGTTCCATGGCTCCACTGG	803,708 F	20	0	55	None	9.6	60
MiH-M21	MiH-M21-r4	AGAGCCGGAACTCCAACTTG	805,004 R	20	0	55	37.4	5.1	60
MiH-M21	MiH-M21-f5	CCTGTGCTTTCAACAACCGG	220,065 F	20	0	55	None	None	60
MiH-M21	MiH-M21-r5	TGCAGCGTACCCAGTAACTG	223,493 R	20	0	55	31.7	None	60
MiH-M21	MiH-M21-f6	AGGTGGGTTAAAGACTCAATATTCT	215,167 F	25	0	36	41.4	None	57.7
MiH-M21	MiH-M21-r6	TGCGTCGTTAATGGGGTCAT	217,166 R	20	0	50	34.6	None	59.7
GE-M19	GE-M19-f1	AGGCTGATACCCTCCAAGAGT	1,041,321 F	21	0	52.4	None	None	60
GE-M19	GE-M19-f2	TGGTGGCGCTAGCTATCATG	1,041,005 F	20	0	55	40.2	23.5	60
GE-M19	GE-M19-r1	ACAGTGAAAAAGGGTAGCAACC	1,338 R	22	0	45.5	46	None	59
GE-M19	GE-M19-r2	TGTGCGCTGGAAAAAGTTTGA	964 R	21	0	42.9	None	9.7	59.5
MsE-M49	MsE-M49-f1	AGGCTCAACGGCATTAGCAA	1,065,170 F	20	0	50	44.6	None	60.3	short, mainly ambiguous bases - not used
MsE-M49	MsE-M49-f2	AAATCACGGCTCTGGTTGGT	44,165 F	20	0	50	None	None	59.9	short, mainly ambiguous bases - not used
MsE-M49	MsE-M49-r2	TTGGATCCAGTGGTGAAGGA	1,346 R	20	0	50	35.6	15.5	58.3	short, mainly ambiguous bases - not used
MsE-M49	MsE-M49-r1	TTGATGTTGTTGCGCCGTAC	1,141 R	20	0	50	None	4.2	59.8	short, mainly ambiguous bases - not used
MsE-M49	MsE-M49-f3	TTGATGTTGTTGCGCCGTAC	1,141 R	20	0	50	None	4.2	59.8	short, mainly ambiguous bases - not used
MsE-M49	MsE-M49-r3	AAATCACGGCTCTGGTTGGT	44,165 F	20	0	50	None	None	59.9	short, mainly ambiguous bases - not used

## Sheet: S2_Genome_Phylogenomics
Supplementary Data 2: List of publicly available and new genomes used for phylogenomic tree reconstruction.
Genome ID	GTDB taxonomy	SAR11-lineage	Taxonomy Fernandes et al. 2025	Completeness (%)	Contamination (%)	Strain heterogeneity	Culture/MAG/SAG	Acc.No
HIMB59	d__Bacteria;p__Pseudomonadota;c__Alphaproteobacteria;o__HIMB59;f__HIMB59;g__HIMB59;s__HIMB59 sp000299115	SAR11-IV		95.78	0	0	Culture	GCA_000299115.1
SP337	d__Bacteria;p__Pseudomonadota;c__Alphaproteobacteria;o__HIMB59;f__GCA-002718135;g__GCA-2717485;s__GCA-2717485 sp002717485	SAR11-IV		89.16	0	0	MAG	GCA_002717485.1
SAG-MED31	d__Bacteria;p__Pseudomonadota;c__Alphaproteobacteria;o__HIMB59;f__GCA-002718135;g__AG-337-I02;s__AG-337-I02 sp014653715	SAR11-IV		65.22	1.35	0	SAG	GCA_014653715.1
SAG-MED32	d__Bacteria;p__Pseudomonadota;c__Alphaproteobacteria;o__Pelagibacterales;f__AG-422-B15;g__AG-422-B15;s__AG-422-B15 sp014653725	SAR11-IV		71.01	0.07	0	SAG	GCA_014653725.1
Fonsibacter_30-26	d__Bacteria;p__Pseudomonadota;c__Alphaproteobacteria;o__Pelagibacterales;f__Pelagibacteraceae;g__Fonsibacter;s__Fonsibacter sp000419465	SAR11-IIIb.9	Fontibacterium abundans	100	0	0	MAG	_
SCGC_AAA028-C07	d__Bacteria;p__Pseudomonadota;c__Alphaproteobacteria;o__Pelagibacterales;f__Pelagibacteraceae;g__Fonsibacter;s__Fonsibacter sp000419465	SAR11-IIIb.9	Fontibacterium abundans	74.12	0.11	0	SAG	GCA_000419465.1
EUL_003	d__Bacteria;p__Pseudomonadota;c__Alphaproteobacteria;o__Pelagibacterales;f__Pelagibacteraceae;g__Fonsibacter;s__Fonsibacter sp000419465	SAR11-IIIb.9	Fontibacterium abundans	86.14	0	0	MAG	GCA_040404245.1
MKE-138	d__Bacteria;p__Pseudomonadota;c__Alphaproteobacteria;o__Pelagibacterales;f__Pelagibacteraceae;g__Fonsibacter;s__	SAR11-IIIb.9	Fontibacterium abundans	98.8	0	0	Culture	GCA_965233975
MiE-29	d__Bacteria;p__Pseudomonadota;c__Alphaproteobacteria;o__Pelagibacterales;f__Pelagibacteraceae;g__Fonsibacter;s__	SAR11-IIIb.9	Fontibacterium abundans	100	0	0	Culture	GCA_965235095
GE-M12	d__Bacteria;p__Pseudomonadota;c__Alphaproteobacteria;o__Pelagibacterales;f__Pelagibacteraceae;g__Fonsibacter;s__	SAR11-IIIb.9	Fontibacterium abundans	100	0	0	Culture	to be released after acceptance
SCGC_AAA027-C06	d__Bacteria;p__Pseudomonadota;c__Alphaproteobacteria;o__Pelagibacterales;f__Pelagibacteraceae;g__Fonsibacter;s__Fonsibacter sp018882565	SAR11-IIIb.8	Fontibacterium medardense	82.29	1.81	100	SAG	GCA_000364545.1
SCGC_AAA027-J10	d__Bacteria;p__Pseudomonadota;c__Alphaproteobacteria;o__Pelagibacterales;f__Pelagibacteraceae;g__Fonsibacter;s__Fonsibacter sp018882565	SAR11-IIIb.8	Fontibacterium medardense	69.56	0	0	SAG	GCA_000371825.1
SCGC_AAA027-L15	d__Bacteria;p__Pseudomonadota;c__Alphaproteobacteria;o__Pelagibacterales;f__Pelagibacteraceae;g__Fonsibacter;s__Fonsibacter sp018882565	SAR11-IIIb.8	Fontibacterium medardense	68.68	0	0	SAG	GCA_000371865.1
ZLKRG47	d__Bacteria;p__Pseudomonadota;c__Alphaproteobacteria;o__Pelagibacterales;f__Pelagibacteraceae;g__Fonsibacter;s__Fonsibacter sp018882565	SAR11-IIIb.8	Fontibacterium medardense	93.37	0	0	MAG	GCA_018882565.1
CTOTU6244	d__Bacteria;p__Pseudomonadota;c__Alphaproteobacteria;o__Pelagibacterales;f__Pelagibacteraceae;g__Fonsibacter;s__Fonsibacter sp018882565	SAR11-IIIb.8	Fontibacterium medardense	89	1.81	100	MAG	GCA_036818025.1
EUL_005	d__Bacteria;p__Pseudomonadota;c__Alphaproteobacteria;o__Pelagibacterales;f__Pelagibacteraceae;g__Fonsibacter;s__Fonsibacter sp018882565	SAR11-IIIb.8	Fontibacterium medardense	91.57	0	0	MAG	GCA_040404185.1
mcdi_2019_sw_WHONDRS-S19S_0017_B_bin.39	d__Bacteria;p__Pseudomonadota;c__Alphaproteobacteria;o__Pelagibacterales;f__Pelagibacteraceae;g__Fonsibacter;s__Fonsibacter sp018882565	SAR11-IIIb.8	Fontibacterium medardense	66.87	0.11	100	MAG	GCA_041165025.1
ME-33	d__Bacteria;p__Pseudomonadota;c__Alphaproteobacteria;o__Pelagibacterales;f__Pelagibacteraceae;g__Fonsibacter;s__Fonsibacter sp018882565	SAR11-IIIb.8	Fontibacterium medardense	98.8	0	0	Culture	GCA_965233985
ME-20	d__Bacteria;p__Pseudomonadota;c__Alphaproteobacteria;o__Pelagibacterales;f__Pelagibacteraceae;g__Fonsibacter;s__Fonsibacter sp018882565	SAR11-IIIb.8	Fontibacterium medardense	98.8	0	0	Culture	GCA_965234055
ME-31	d__Bacteria;p__Pseudomonadota;c__Alphaproteobacteria;o__Pelagibacterales;f__Pelagibacteraceae;g__Fonsibacter;s__Fonsibacter sp018882565	SAR11-IIIb.8	Fontibacterium medardense	100	0	0	Culture	GCA_965234115
ME-18	d__Bacteria;p__Pseudomonadota;c__Alphaproteobacteria;o__Pelagibacterales;f__Pelagibacteraceae;g__Fonsibacter;s__Fonsibacter sp018882565	SAR11-IIIb.8	Fontibacterium medardense	97.59	0	0	Culture	GCA_965234185
ME-17	d__Bacteria;p__Pseudomonadota;c__Alphaproteobacteria;o__Pelagibacterales;f__Pelagibacteraceae;g__Fonsibacter;s__Fonsibacter sp018882565	SAR11-IIIb.8	Fontibacterium medardense	97.59	0	0	Culture	GCA_965235075
N-Balt1-05jul22-002	d__Bacteria;p__Pseudomonadota;c__Alphaproteobacteria;o__Pelagibacterales;f__Pelagibacteraceae;g__Fonsibacter;s__Fonsibacter sp018882565	SAR11-IIIb.8	Fontibacterium medardense	100	1.2	100	MAG	GCA_965235295
N-Balt3-05jul22-017	d__Bacteria;p__Pseudomonadota;c__Alphaproteobacteria;o__Pelagibacterales;f__Pelagibacteraceae;g__Fonsibacter;s__Fonsibacter sp018882565	SAR11-IIIb.8	Fontibacterium medardense	81.93	3.61	100	MAG	GCA_965235875
MsE-M49	d__Bacteria;p__Pseudomonadota;c__Alphaproteobacteria;o__Pelagibacterales;f__Pelagibacteraceae;g__Fonsibacter;s__Fonsibacter sp018882565	SAR11-IIIb.8	Fontibacterium medardense	100	0	0	Culture	to be released after acceptance
SlaE-M7	d__Bacteria;p__Pseudomonadota;c__Alphaproteobacteria;o__Pelagibacterales;f__Pelagibacteraceae;g__Fonsibacter;s__Fonsibacter sp018882565	SAR11-IIIb.8	Fontibacterium medardense	98.8	0	0	Culture	to be released after acceptance
Go_Leine_bin_62	d__Bacteria;p__Pseudomonadota;c__Alphaproteobacteria;o__Pelagibacterales;f__Pelagibacteraceae;g__Fonsibacter;s__Fonsibacter sp018882565	SAR11-IIIb.8	Fontibacterium medardense	65.22	1.81	25	MAG	GCA_017984255.1
WB5_1B_059	d__Bacteria;p__Pseudomonadota;c__Alphaproteobacteria;o__Pelagibacterales;f__Pelagibacteraceae;g__Fonsibacter;s__Fonsibacter sp018658635	SAR11-IIIb.7		61.23	4.82	40	MAG	GCA_009921875.1
WB5_1A_055	d__Bacteria;p__Pseudomonadota;c__Alphaproteobacteria;o__Pelagibacterales;f__Pelagibacteraceae;g__Fonsibacter;s__Fonsibacter sp018658635	SAR11-IIIb.7		52.39	2.41	0	MAG	GCA_009928175.1
SI039_bin95	d__Bacteria;p__Pseudomonadota;c__Alphaproteobacteria;o__Pelagibacterales;f__Pelagibacteraceae;g__Fonsibacter;s__Fonsibacter sp018658635	SAR11-IIIb.7		83.95	2.48	100	MAG	GCA_018658635.1
ELA147	d__Bacteria;p__Pseudomonadota;c__Alphaproteobacteria;o__Pelagibacterales;f__Pelagibacteraceae;g__Fonsibacter;s__Fonsibacter sp018658635	SAR11-IIIb.7		79.52	0	0	MAG	GCA_037142395.1
N-InaH-25sep22-C54	d__Bacteria;p__Pseudomonadota;c__Alphaproteobacteria;o__Pelagibacterales;f__Pelagibacteraceae;g__Fonsibacter;s__Fonsibacter sp018658635	SAR11-IIIb.7		60.24	0	0	MAG	GCA_965244885
Baikal-deep-G36	d__Bacteria;p__Pseudomonadota;c__Alphaproteobacteria;o__Pelagibacterales;f__Pelagibacteraceae;g__Fonsibacter;s__Fonsibacter sp009693745	SAR11-IIIb.6	Fontibacterium baikalense	95.18	3.89	100	MAG	GCA_009693745.1
ELA695	d__Bacteria;p__Pseudomonadota;c__Alphaproteobacteria;o__Pelagibacterales;f__Pelagibacteraceae;g__Fonsibacter;s__Fonsibacter sp037128905	SAR11-IIIb.5		65.32	0	0	MAG	GCA_037128905.1
LinL3_bin-0761	d__Bacteria;p__Pseudomonadota;c__Alphaproteobacteria;o__Pelagibacterales;f__Pelagibacteraceae;g__Fonsibacter;s__Fonsibacter sp037128905	SAR11-IIIb.5		61.85	1.31	100	MAG	GCA_903820825.1
LinL5_bin-0142	d__Bacteria;p__Pseudomonadota;c__Alphaproteobacteria;o__Pelagibacterales;f__Pelagibacteraceae;g__Fonsibacter;s__Fonsibacter sp037128905	SAR11-IIIb.5		53.82	0.25	100	MAG	GCA_903856515.1
Ki3-D3_bin-0033	d__Bacteria;p__Pseudomonadota;c__Alphaproteobacteria;o__Pelagibacterales;f__Pelagibacteraceae;g__Fonsibacter;s__Fonsibacter sp037128905	SAR11-IIIb.5		78.56	4.93	100	MAG	GCA_903894405.1
Kiruna_bin-05406	d__Bacteria;p__Pseudomonadota;c__Alphaproteobacteria;o__Pelagibacterales;f__Pelagibacteraceae;g__Fonsibacter;s__Fonsibacter sp037128905	SAR11-IIIb.5		65.46	0	0	MAG	GCA_903897585.1
Kiruna3_bin-0622	d__Bacteria;p__Pseudomonadota;c__Alphaproteobacteria;o__Pelagibacterales;f__Pelagibacteraceae;g__Fonsibacter;s__Fonsibacter sp037128905	SAR11-IIIb.5		69.91	4.34	100	MAG	GCA_903903005.1
Ki3-D1_bin-0962	d__Bacteria;p__Pseudomonadota;c__Alphaproteobacteria;o__Pelagibacterales;f__Pelagibacteraceae;g__Fonsibacter;s__Fonsibacter sp037128905	SAR11-IIIb.5		86.33	2.13	85.71	MAG	GCA_903913155.1
Ki3-D2_bin-0457	d__Bacteria;p__Pseudomonadota;c__Alphaproteobacteria;o__Pelagibacterales;f__Pelagibacteraceae;g__Fonsibacter;s__Fonsibacter sp037128905	SAR11-IIIb.5		71.06	4.45	83.33	MAG	GCA_903867195.1
EUL_011	d__Bacteria;p__Pseudomonadota;c__Alphaproteobacteria;o__Pelagibacterales;f__Pelagibacteraceae;g__Fonsibacter;s__Fonsibacter sp040404065	SAR11-IIIb.4	Fontibacterium boreale	100	1.2	0	MAG	GCA_040404065.1
Umea1_bin-0681	d__Bacteria;p__Pseudomonadota;c__Alphaproteobacteria;o__Pelagibacterales;f__Pelagibacteraceae;g__Fonsibacter;s__Fonsibacter sp040404065	SAR11-IIIb.4	Fontibacterium boreale	89.05	1.81	100	MAG	GCA_903824465.1
Umea1p2_bin-1062	d__Bacteria;p__Pseudomonadota;c__Alphaproteobacteria;o__Pelagibacterales;f__Pelagibacteraceae;g__Fonsibacter;s__Fonsibacter sp040404065	SAR11-IIIb.4	Fontibacterium boreale	84.94	1.49	75	MAG	GCA_903903145.1
Umea_bin-09620	d__Bacteria;p__Pseudomonadota;c__Alphaproteobacteria;o__Pelagibacterales;f__Pelagibacteraceae;g__Fonsibacter;s__Fonsibacter sp040404065	SAR11-IIIb.4	Fontibacterium boreale	96.39	0.11	0	MAG	GCA_903909545.1
Umea1p1_bin-338	d__Bacteria;p__Pseudomonadota;c__Alphaproteobacteria;o__Pelagibacterales;f__Pelagibacteraceae;g__Fonsibacter;s__Fonsibacter sp040404065	SAR11-IIIb.4	Fontibacterium boreale	92.17	4.82	100	MAG	GCA_903912025.1
3300027749-48	d__Bacteria;p__Pseudomonadota;c__Alphaproteobacteria;o__Pelagibacterales;f__Pelagibacteraceae;g__Fonsibacter;s__Fonsibacter sp000371745	SAR11-IIIb.3		90.31	4.82	100	MAG	3300027749_48
SCGC_AAA280-B11	d__Bacteria;p__Pseudomonadota;c__Alphaproteobacteria;o__Pelagibacterales;f__Pelagibacteraceae;g__Fonsibacter;s__Fonsibacter sp000371745	SAR11-IIIb.3		51.24	0	0	SAG	GCA_000371745.1
Ki2-D2_bin-0859	d__Bacteria;p__Pseudomonadota;c__Alphaproteobacteria;o__Pelagibacterales;f__Pelagibacteraceae;g__Fonsibacter;s__Fonsibacter sp903869725	SAR11-IIIb.2	Fontibacterium scandinaviense	71.13	2.48	33.33	MAG	GCA_903822615.1
Umea3p2_bin-0135	d__Bacteria;p__Pseudomonadota;c__Alphaproteobacteria;o__Pelagibacterales;f__Pelagibacteraceae;g__Fonsibacter;s__Fonsibacter sp903869725	SAR11-IIIb.2	Fontibacterium scandinaviense	83.73	1.42	33.33	MAG	GCA_903822775.1
KR1_bin-0258	d__Bacteria;p__Pseudomonadota;c__Alphaproteobacteria;o__Pelagibacterales;f__Pelagibacteraceae;g__Fonsibacter;s__Fonsibacter sp903869725	SAR11-IIIb.2	Fontibacterium scandinaviense	90.96	1.31	100	MAG	GCA_903836815.1
Umea_bin-06116	d__Bacteria;p__Pseudomonadota;c__Alphaproteobacteria;o__Pelagibacterales;f__Pelagibacteraceae;g__Fonsibacter;s__Fonsibacter sp903869725	SAR11-IIIb.2	Fontibacterium scandinaviense	100	0.11	100	MAG	GCA_903837935.1
KR_bin-3261	d__Bacteria;p__Pseudomonadota;c__Alphaproteobacteria;o__Pelagibacterales;f__Pelagibacteraceae;g__Fonsibacter;s__Fonsibacter sp903869725	SAR11-IIIb.2	Fontibacterium scandinaviense	92.77	4.33	85.71	MAG	GCA_903839655.1
Umea3p1_bin-0107	d__Bacteria;p__Pseudomonadota;c__Alphaproteobacteria;o__Pelagibacterales;f__Pelagibacteraceae;g__Fonsibacter;s__Fonsibacter sp903869725	SAR11-IIIb.2	Fontibacterium scandinaviense	98.19	3.01	100	MAG	GCA_903844175.1
Umea3_bin-0378	d__Bacteria;p__Pseudomonadota;c__Alphaproteobacteria;o__Pelagibacterales;f__Pelagibacteraceae;g__Fonsibacter;s__Fonsibacter sp903869725	SAR11-IIIb.2	Fontibacterium scandinaviense	100	0.6	100	MAG	GCA_903854225.1
Umea2p1_bin-0712	d__Bacteria;p__Pseudomonadota;c__Alphaproteobacteria;o__Pelagibacterales;f__Pelagibacteraceae;g__Fonsibacter;s__Fonsibacter sp903869725	SAR11-IIIb.2	Fontibacterium scandinaviense	98.19	1.81	100	MAG	GCA_903860105.1
VK2_bin-0761	d__Bacteria;p__Pseudomonadota;c__Alphaproteobacteria;o__Pelagibacterales;f__Pelagibacteraceae;g__Fonsibacter;s__Fonsibacter sp903869725	SAR11-IIIb.2	Fontibacterium scandinaviense	95.18	1.31	50	MAG	GCA_903864245.1
Kiruna_bin-10871	d__Bacteria;p__Pseudomonadota;c__Alphaproteobacteria;o__Pelagibacterales;f__Pelagibacteraceae;g__Fonsibacter;s__Fonsibacter sp903869725	SAR11-IIIb.2	Fontibacterium scandinaviense	95.58	2.52	66.67	MAG	GCA_903866245.1
VK_bin-1211	d__Bacteria;p__Pseudomonadota;c__Alphaproteobacteria;o__Pelagibacterales;f__Pelagibacteraceae;g__Fonsibacter;s__Fonsibacter sp903869725	SAR11-IIIb.2	Fontibacterium scandinaviense	93.98	2.41	50	MAG	GCA_903868445.1
AM1_bin-0028	d__Bacteria;p__Pseudomonadota;c__Alphaproteobacteria;o__Pelagibacterales;f__Pelagibacteraceae;g__Fonsibacter;s__Fonsibacter sp903869725	SAR11-IIIb.2	Fontibacterium scandinaviense	100	0	0	MAG	GCA_903869725.1
AM2_bin-0866	d__Bacteria;p__Pseudomonadota;c__Alphaproteobacteria;o__Pelagibacterales;f__Pelagibacteraceae;g__Fonsibacter;s__Fonsibacter sp903869725	SAR11-IIIb.2	Fontibacterium scandinaviense	67.97	0.11	0	MAG	GCA_903874225.1
AM_bin-3698	d__Bacteria;p__Pseudomonadota;c__Alphaproteobacteria;o__Pelagibacterales;f__Pelagibacteraceae;g__Fonsibacter;s__Fonsibacter sp903869725	SAR11-IIIb.2	Fontibacterium scandinaviense	100	3.31	0	MAG	GCA_903875305.1
KR2_bin-1077	d__Bacteria;p__Pseudomonadota;c__Alphaproteobacteria;o__Pelagibacterales;f__Pelagibacteraceae;g__Fonsibacter;s__Fonsibacter sp903869725	SAR11-IIIb.2	Fontibacterium scandinaviense	93.98	0	0	MAG	GCA_903886435.1
Umea2p2_bin-1150	d__Bacteria;p__Pseudomonadota;c__Alphaproteobacteria;o__Pelagibacterales;f__Pelagibacteraceae;g__Fonsibacter;s__Fonsibacter sp903869725	SAR11-IIIb.2	Fontibacterium scandinaviense	98.19	1.2	100	MAG	GCA_903889095.1
YR2_bin-0491	d__Bacteria;p__Pseudomonadota;c__Alphaproteobacteria;o__Pelagibacterales;f__Pelagibacteraceae;g__Fonsibacter;s__Fonsibacter sp903869725	SAR11-IIIb.2	Fontibacterium scandinaviense	56.63	0	0	MAG	GCA_903893005.1
Ki2-D1_bin-0906	d__Bacteria;p__Pseudomonadota;c__Alphaproteobacteria;o__Pelagibacterales;f__Pelagibacteraceae;g__Fonsibacter;s__Fonsibacter sp903869725	SAR11-IIIb.2	Fontibacterium scandinaviense	51.49	1.53	25	MAG	GCA_903899565.1
Umea3p3_bin-1192	d__Bacteria;p__Pseudomonadota;c__Alphaproteobacteria;o__Pelagibacterales;f__Pelagibacteraceae;g__Fonsibacter;s__Fonsibacter sp903869725	SAR11-IIIb.2	Fontibacterium scandinaviense	68.98	0.2	100	MAG	GCA_903902595.1
YR_bin-3962	d__Bacteria;p__Pseudomonadota;c__Alphaproteobacteria;o__Pelagibacterales;f__Pelagibacteraceae;g__Fonsibacter;s__Fonsibacter sp903869725	SAR11-IIIb.2	Fontibacterium scandinaviense	93.37	0	0	MAG	GCA_903905535.1
Umea3p4_bin-0316	d__Bacteria;p__Pseudomonadota;c__Alphaproteobacteria;o__Pelagibacterales;f__Pelagibacteraceae;g__Fonsibacter;s__Fonsibacter sp903869725	SAR11-IIIb.2	Fontibacterium scandinaviense	87.95	2.52	0	MAG	GCA_903907455.1
VK1_bin-1242	d__Bacteria;p__Pseudomonadota;c__Alphaproteobacteria;o__Pelagibacterales;f__Pelagibacteraceae;g__Fonsibacter;s__Fonsibacter sp903869725	SAR11-IIIb.2	Fontibacterium scandinaviense	93.98	1.81	100	MAG	GCA_903918815.1
Umea2_bin-2667	d__Bacteria;p__Pseudomonadota;c__Alphaproteobacteria;o__Pelagibacterales;f__Pelagibacteraceae;g__Fonsibacter;s__Fonsibacter sp903869725	SAR11-IIIb.2	Fontibacterium scandinaviense	96.39	0.6	100	MAG	GCA_903928985.1
3300011984-2	d__Bacteria;p__Pseudomonadota;c__Alphaproteobacteria;o__Pelagibacterales;f__Pelagibacteraceae;g__Fonsibacter;s__Fonsibacter ubiquis	SAR11-IIIb.16	Fontibacterium commune	86.14	0	0	MAG	3300011984_2
3300014029-2	d__Bacteria;p__Pseudomonadota;c__Alphaproteobacteria;o__Pelagibacterales;f__Pelagibacteraceae;g__Fonsibacter;s__Fonsibacter ubiquis	SAR11-IIIb.16	Fontibacterium commune	86.14	0	0	MAG	3300014029_2
3300014957-4	d__Bacteria;p__Pseudomonadota;c__Alphaproteobacteria;o__Pelagibacterales;f__Pelagibacteraceae;g__Fonsibacter;s__Fonsibacter ubiquis	SAR11-IIIb.16	Fontibacterium commune	93.98	1.2	100	MAG	3300014957_4
UBA4760	d__Bacteria;p__Pseudomonadota;c__Alphaproteobacteria;o__Pelagibacterales;f__Pelagibacteraceae;g__Fonsibacter;s__Fonsibacter ubiquis	SAR11-IIIb.16	Fontibacterium commune	75.58	0.11	100	MAG	GCA_002403525.1
BS14	d__Bacteria;p__Pseudomonadota;c__Alphaproteobacteria;o__Pelagibacterales;f__Pelagibacteraceae;g__Fonsibacter;s__Fonsibacter ubiquis	SAR11-IIIb.16	Fontibacterium commune	88.55	0	0	MAG	GCA_003569325.1
WB8_2A_001	d__Bacteria;p__Pseudomonadota;c__Alphaproteobacteria;o__Pelagibacterales;f__Pelagibacteraceae;g__Fonsibacter;s__Fonsibacter ubiquis	SAR11-IIIb.16	Fontibacterium commune	78.61	0.6	100	MAG	GCA_010020665.1
WB8_2B_001	d__Bacteria;p__Pseudomonadota;c__Alphaproteobacteria;o__Pelagibacterales;f__Pelagibacteraceae;g__Fonsibacter;s__Fonsibacter ubiquis	SAR11-IIIb.16	Fontibacterium commune	73.81	1.04	20	MAG	GCA_010020675.1
WB7_2xK_001	d__Bacteria;p__Pseudomonadota;c__Alphaproteobacteria;o__Pelagibacterales;f__Pelagibacteraceae;g__Fonsibacter;s__Fonsibacter ubiquis	SAR11-IIIb.16	Fontibacterium commune	77.31	0	0	MAG	GCA_010020755.1
WB7_2xI_001	d__Bacteria;p__Pseudomonadota;c__Alphaproteobacteria;o__Pelagibacterales;f__Pelagibacteraceae;g__Fonsibacter;s__Fonsibacter ubiquis	SAR11-IIIb.16	Fontibacterium commune	79.9	0	0	MAG	GCA_010020785.1
WB7_2xD_001	d__Bacteria;p__Pseudomonadota;c__Alphaproteobacteria;o__Pelagibacterales;f__Pelagibacteraceae;g__Fonsibacter;s__Fonsibacter ubiquis	SAR11-IIIb.16	Fontibacterium commune	80.51	0	0	MAG	GCA_010020815.1
WB7_2xJ_001	d__Bacteria;p__Pseudomonadota;c__Alphaproteobacteria;o__Pelagibacterales;f__Pelagibacteraceae;g__Fonsibacter;s__Fonsibacter ubiquis	SAR11-IIIb.16	Fontibacterium commune	82.71	0	0	MAG	GCA_010020885.1
WB7_2xB_001	d__Bacteria;p__Pseudomonadota;c__Alphaproteobacteria;o__Pelagibacterales;f__Pelagibacteraceae;g__Fonsibacter;s__Fonsibacter ubiquis	SAR11-IIIb.16	Fontibacterium commune	77.18	0.11	100	MAG	GCA_010020895.1
WB7_2xL_001	d__Bacteria;p__Pseudomonadota;c__Alphaproteobacteria;o__Pelagibacterales;f__Pelagibacteraceae;g__Fonsibacter;s__Fonsibacter ubiquis	SAR11-IIIb.16	Fontibacterium commune	82.86	0	0	MAG	GCA_010020905.1
WB7_2xG_001	d__Bacteria;p__Pseudomonadota;c__Alphaproteobacteria;o__Pelagibacterales;f__Pelagibacteraceae;g__Fonsibacter;s__Fonsibacter ubiquis	SAR11-IIIb.16	Fontibacterium commune	84.54	0	0	MAG	GCA_010020945.1
WB7_2xA_001	d__Bacteria;p__Pseudomonadota;c__Alphaproteobacteria;o__Pelagibacterales;f__Pelagibacteraceae;g__Fonsibacter;s__Fonsibacter ubiquis	SAR11-IIIb.16	Fontibacterium commune	75.26	0	0	MAG	GCA_010020955.1
WB7_2xE_001	d__Bacteria;p__Pseudomonadota;c__Alphaproteobacteria;o__Pelagibacterales;f__Pelagibacteraceae;g__Fonsibacter;s__Fonsibacter ubiquis	SAR11-IIIb.16	Fontibacterium commune	82.4	0.4	0	MAG	GCA_010020985.1
WB7_2xM_001	d__Bacteria;p__Pseudomonadota;c__Alphaproteobacteria;o__Pelagibacterales;f__Pelagibacteraceae;g__Fonsibacter;s__Fonsibacter ubiquis	SAR11-IIIb.16	Fontibacterium commune	79.03	0	0	MAG	GCA_010020995.1
WB7_2xN_001	d__Bacteria;p__Pseudomonadota;c__Alphaproteobacteria;o__Pelagibacterales;f__Pelagibacteraceae;g__Fonsibacter;s__Fonsibacter ubiquis	SAR11-IIIb.16	Fontibacterium commune	74.08	0	0	MAG	GCA_010021025.1
WB7_2xH_001	d__Bacteria;p__Pseudomonadota;c__Alphaproteobacteria;o__Pelagibacterales;f__Pelagibacteraceae;g__Fonsibacter;s__Fonsibacter ubiquis	SAR11-IIIb.16	Fontibacterium commune	84.05	0.66	22.22	MAG	GCA_010021035.1
WB7_2xF_001	d__Bacteria;p__Pseudomonadota;c__Alphaproteobacteria;o__Pelagibacterales;f__Pelagibacteraceae;g__Fonsibacter;s__Fonsibacter ubiquis	SAR11-IIIb.16	Fontibacterium commune	83.02	1.2	100	MAG	GCA_010021065.1
WB7_2xC_001	d__Bacteria;p__Pseudomonadota;c__Alphaproteobacteria;o__Pelagibacterales;f__Pelagibacteraceae;g__Fonsibacter;s__Fonsibacter ubiquis	SAR11-IIIb.16	Fontibacterium commune	83.81	0.11	0	MAG	GCA_010024335.1
WBA_1A_001	d__Bacteria;p__Pseudomonadota;c__Alphaproteobacteria;o__Pelagibacterales;f__Pelagibacteraceae;g__Fonsibacter;s__Fonsibacter ubiquis	SAR11-IIIb.16	Fontibacterium commune	82.44	0	0	MAG	GCA_010026375.1
WB9_1A_001	d__Bacteria;p__Pseudomonadota;c__Alphaproteobacteria;o__Pelagibacterales;f__Pelagibacteraceae;g__Fonsibacter;s__Fonsibacter ubiquis	SAR11-IIIb.16	Fontibacterium commune	86.44	0	0	MAG	GCA_010026465.1
WB9_1B_001	d__Bacteria;p__Pseudomonadota;c__Alphaproteobacteria;o__Pelagibacterales;f__Pelagibacteraceae;g__Fonsibacter;s__Fonsibacter ubiquis	SAR11-IIIb.16	Fontibacterium commune	85.43	0.44	0	MAG	GCA_010026855.1
WBA_1B_001	d__Bacteria;p__Pseudomonadota;c__Alphaproteobacteria;o__Pelagibacterales;f__Pelagibacteraceae;g__Fonsibacter;s__Fonsibacter ubiquis	SAR11-IIIb.16	Fontibacterium commune	86.22	1.25	0	MAG	GCA_010028665.1
WBB_3_001	d__Bacteria;p__Pseudomonadota;c__Alphaproteobacteria;o__Pelagibacterales;f__Pelagibacteraceae;g__Fonsibacter;s__Fonsibacter ubiquis	SAR11-IIIb.16	Fontibacterium commune	76.4	1.2	0	MAG	GCA_010030565.1
LBMAG_Alphaproteobacteria_epi.bin1_LD12	d__Bacteria;p__Pseudomonadota;c__Alphaproteobacteria;o__Pelagibacterales;f__Pelagibacteraceae;g__Fonsibacter;s__Fonsibacter ubiquis	SAR11-IIIb.16	Fontibacterium commune	79.92	0	0	MAG	GCA_014190315.1
K_Offshore_40m_m1_069	d__Bacteria;p__Pseudomonadota;c__Alphaproteobacteria;o__Pelagibacterales;f__Pelagibacteraceae;g__Fonsibacter;s__Fonsibacter sp016882185	SAR11-IIIb.16	Fontibacterium commune	77.71	3.34	83.33	MAG	GCA_016882185.1
MDM.24	d__Bacteria;p__Pseudomonadota;c__Alphaproteobacteria;o__Pelagibacterales;f__Pelagibacteraceae;g__Fonsibacter;s__Fonsibacter ubiquis	SAR11-IIIb.16	Fontibacterium commune	86.75	1.42	0	MAG	GCA_023259745.1
AMR_MDS_5432	d__Bacteria;p__Pseudomonadota;c__Alphaproteobacteria;o__Pelagibacterales;f__Pelagibacteraceae;g__Fonsibacter;s__Fonsibacter ubiquis	SAR11-IIIb.16	Fontibacterium commune	96.39	0	0	MAG	GCA_035441285.1
EUL_010	d__Bacteria;p__Pseudomonadota;c__Alphaproteobacteria;o__Pelagibacterales;f__Pelagibacteraceae;g__Fonsibacter;s__Fonsibacter ubiquis	SAR11-IIIb.16	Fontibacterium commune	89.16	0.6	100	MAG	GCA_040404085.1
blackwarrior_2019_sw_WHONDRS-S19S_0021_B_bin.58	d__Bacteria;p__Pseudomonadota;c__Alphaproteobacteria;o__Pelagibacterales;f__Pelagibacteraceae;g__Fonsibacter;s__Fonsibacter ubiquis	SAR11-IIIb.16	Fontibacterium commune	87.35	0	0	MAG	GCA_041157725.1
NASQAN2012_115_B_bin.9	d__Bacteria;p__Pseudomonadota;c__Alphaproteobacteria;o__Pelagibacterales;f__Pelagibacteraceae;g__Fonsibacter;s__Fonsibacter ubiquis	SAR11-IIIb.16	Fontibacterium commune	65.52	1.81	100	MAG	GCA_041177885.1
NASQAN2016_060_F_bin.4	d__Bacteria;p__Pseudomonadota;c__Alphaproteobacteria;o__Pelagibacterales;f__Pelagibacteraceae;g__Fonsibacter;s__Fonsibacter ubiquis	SAR11-IIIb.16	Fontibacterium commune	82.91	0	0	MAG	GCA_041183365.1
NASQAN2016_060_B_bin.5	d__Bacteria;p__Pseudomonadota;c__Alphaproteobacteria;o__Pelagibacterales;f__Pelagibacteraceae;g__Fonsibacter;s__Fonsibacter ubiquis	SAR11-IIIb.16	Fontibacterium commune	77.71	0	0	MAG	GCA_041183405.1
CJ05B_6.45	d__Bacteria;p__Pseudomonadota;c__Alphaproteobacteria;o__Pelagibacterales;f__Pelagibacteraceae;g__Fonsibacter;s__Fonsibacter ubiquis	SAR11-IIIb.16	Fontibacterium commune	80.12	1.2	0	MAG	GCA_041254685.1
CJ01B_1.77	d__Bacteria;p__Pseudomonadota;c__Alphaproteobacteria;o__Pelagibacterales;f__Pelagibacteraceae;g__Fonsibacter;s__Fonsibacter ubiquis	SAR11-IIIb.16	Fontibacterium commune	86.64	3.9	100	MAG	GCA_041256105.1
LaPlata-5m-a_bin-100	d__Bacteria;p__Pseudomonadota;c__Alphaproteobacteria;o__Pelagibacterales;f__Pelagibacteraceae;g__Fonsibacter;s__Fonsibacter ubiquis	SAR11-IIIb.16	Fontibacterium commune	65.44	0.85	100	MAG	GCA_903823395.1
LaPlata-5m-b_bin-419	d__Bacteria;p__Pseudomonadota;c__Alphaproteobacteria;o__Pelagibacterales;f__Pelagibacteraceae;g__Fonsibacter;s__Fonsibacter ubiquis	SAR11-IIIb.16	Fontibacterium commune	69.13	0.14	100	MAG	GCA_903839115.1
LaPlata-7m-a_bin-268	d__Bacteria;p__Pseudomonadota;c__Alphaproteobacteria;o__Pelagibacterales;f__Pelagibacteraceae;g__Fonsibacter;s__Fonsibacter ubiquis	SAR11-IIIb.16	Fontibacterium commune	66.39	4.36	60	MAG	GCA_903840565.1
LE-05nov19-195	d__Bacteria;p__Pseudomonadota;c__Alphaproteobacteria;o__Pelagibacterales;f__Pelagibacteraceae;g__Fonsibacter;s__Fonsibacter ubiquis	SAR11-IIIb.16	Fontibacterium commune	67.63	0.11	0	MAG	GCA_964201085.1
CJ05B_6.45	d__Bacteria;p__Pseudomonadota;c__Alphaproteobacteria;o__Pelagibacterales;f__Pelagibacteraceae;g__Fonsibacter;s__Fonsibacter ubiquis	SAR11-IIIb.16	Fontibacterium commune	80.12	1.2	0	MAG	GCA_964228415.1
CJ01B_1.77	d__Bacteria;p__Pseudomonadota;c__Alphaproteobacteria;o__Pelagibacterales;f__Pelagibacteraceae;g__Fonsibacter;s__Fonsibacter ubiquis	SAR11-IIIb.16	Fontibacterium commune	86.64	3.9	100	MAG	GCA_964228765.1
N-SamH-20apr23-066	d__Bacteria;p__Pseudomonadota;c__Alphaproteobacteria;o__Pelagibacterales;f__Pelagibacteraceae;g__Fonsibacter;s__Fonsibacter ubiquis	SAR11-IIIb.16	Fontibacterium commune	98.8	0	0	MAG	GCA_965235145
N-SamE-20apr23-052	d__Bacteria;p__Pseudomonadota;c__Alphaproteobacteria;o__Pelagibacterales;f__Pelagibacteraceae;g__Fonsibacter;s__Fonsibacter ubiquis	SAR11-IIIb.16	Fontibacterium commune	90.36	0	0	MAG	GCA_965235155
N-BarE-26apr23-045	d__Bacteria;p__Pseudomonadota;c__Alphaproteobacteria;o__Pelagibacterales;f__Pelagibacteraceae;g__Fonsibacter;s__Fonsibacter ubiquis	SAR11-IIIb.16	Fontibacterium commune	96.39	2.41	100	MAG	GCA_965235165
N-MdE-27apr23-011	d__Bacteria;p__Pseudomonadota;c__Alphaproteobacteria;o__Pelagibacterales;f__Pelagibacteraceae;g__Fonsibacter;s__Fonsibacter ubiquis	SAR11-IIIb.16	Fontibacterium commune	92.77	0	0	MAG	GCA_965235255
MaE-04nov19-320	d__Bacteria;p__Pseudomonadota;c__Alphaproteobacteria;o__Pelagibacterales;f__Pelagibacteraceae;g__Fonsibacter;s__Fonsibacter ubiquis	SAR11-IIIb.16	Fontibacterium commune	46.99	4.89	80	MAG	GCA_965235465
LH-05nov19-97	d__Bacteria;p__Pseudomonadota;c__Alphaproteobacteria;o__Pelagibacterales;f__Pelagibacteraceae;g__Fonsibacter;s__Fonsibacter ubiquis	SAR11-IIIb.16	Fontibacterium commune	50	0	0	MAG	GCA_965235545
N-IMU-22jan24-062	d__Bacteria;p__Pseudomonadota;c__Alphaproteobacteria;o__Pelagibacterales;f__Pelagibacteraceae;g__Fonsibacter;s__Fonsibacter ubiquis	SAR11-IIIb.16	Fontibacterium commune	97.59	0	0	MAG	GCA_965235585
N-ChE-26sep22-010	d__Bacteria;p__Pseudomonadota;c__Alphaproteobacteria;o__Pelagibacterales;f__Pelagibacteraceae;g__Fonsibacter;s__Fonsibacter ubiquis	SAR11-IIIb.16	Fontibacterium commune	95.78	0	0	MAG	GCA_965235595
N-LaNe-23jan24-002	d__Bacteria;p__Pseudomonadota;c__Alphaproteobacteria;o__Pelagibacterales;f__Pelagibacteraceae;g__Fonsibacter;s__	SAR11-IIIb.16	Fontibacterium commune	67.85	1.2	100	MAG	GCA_965235625
N-Mw1-16nov23-028	d__Bacteria;p__Pseudomonadota;c__Alphaproteobacteria;o__Pelagibacterales;f__Pelagibacteraceae;g__Fonsibacter;s__Fonsibacter sp016882185	SAR11-IIIb.16	Fontibacterium commune	98.72	0	0	MAG	GCA_965235685
N-Mw5-13nov23-012	d__Bacteria;p__Pseudomonadota;c__Alphaproteobacteria;o__Pelagibacterales;f__Pelagibacteraceae;g__Fonsibacter;s__Fonsibacter sp016882185	SAR11-IIIb.16	Fontibacterium commune	80.65	0	0	MAG	GCA_965235725
N-Mw13-23nov23-098	d__Bacteria;p__Pseudomonadota;c__Alphaproteobacteria;o__Pelagibacterales;f__Pelagibacteraceae;g__Fonsibacter;s__Fonsibacter sp016882185	SAR11-IIIb.16	Fontibacterium commune	71.01	2.41	100	MAG	GCA_965235755
N-Mw14-23nov23-026	d__Bacteria;p__Pseudomonadota;c__Alphaproteobacteria;o__Pelagibacterales;f__Pelagibacteraceae;g__Fonsibacter;s__Fonsibacter sp016882185	SAR11-IIIb.16	Fontibacterium commune	89.09	0	0	MAG	GCA_965235775
N-Mw8-13nov23-022	d__Bacteria;p__Pseudomonadota;c__Alphaproteobacteria;o__Pelagibacterales;f__Pelagibacteraceae;g__Fonsibacter;s__Fonsibacter sp016882185	SAR11-IIIb.16	Fontibacterium commune	88.48	1.31	0	MAG	GCA_965235795
N-Mw1-16nov23-079	d__Bacteria;p__Pseudomonadota;c__Alphaproteobacteria;o__Pelagibacterales;f__Pelagibacteraceae;g__Fonsibacter;s__Fonsibacter sp016882185	SAR11-IIIb.16	Fontibacterium commune	81.86	0	0	MAG	GCA_965235825
N-Mw5-13nov23-050	d__Bacteria;p__Pseudomonadota;c__Alphaproteobacteria;o__Pelagibacterales;f__Pelagibacteraceae;g__Fonsibacter;s__Fonsibacter sp016882185	SAR11-IIIb.16	Fontibacterium commune	68.17	3.61	66.67	MAG	GCA_965235845
N-BiE-22sep22-058	d__Bacteria;p__Pseudomonadota;c__Alphaproteobacteria;o__Pelagibacterales;f__Pelagibacteraceae;g__Fonsibacter;s__Fonsibacter ubiquis	SAR11-IIIb.16	Fontibacterium commune	98.19	2.41	100	MAG	GCA_965236005
N-Mw2-16nov23-073	d__Bacteria;p__Pseudomonadota;c__Alphaproteobacteria;o__Pelagibacterales;f__Pelagibacteraceae;g__Fonsibacter;s__Fonsibacter sp016882185	SAR11-IIIb.16	Fontibacterium commune	96.31	0	0	MAG	GCA_965236015
N-Mw6-13nov23-029	d__Bacteria;p__Pseudomonadota;c__Alphaproteobacteria;o__Pelagibacterales;f__Pelagibacteraceae;g__Fonsibacter;s__Fonsibacter sp016882185	SAR11-IIIb.16	Fontibacterium commune	90.29	0	0	MAG	GCA_965236075
N-Mw11-20nov23-012	d__Bacteria;p__Pseudomonadota;c__Alphaproteobacteria;o__Pelagibacterales;f__Pelagibacteraceae;g__Fonsibacter;s__Fonsibacter sp016882185	SAR11-IIIb.16	Fontibacterium commune	83.06	0	0	MAG	GCA_965236105
N-Mw13-23nov23-045	d__Bacteria;p__Pseudomonadota;c__Alphaproteobacteria;o__Pelagibacterales;f__Pelagibacteraceae;g__Fonsibacter;s__Fonsibacter sp016882185	SAR11-IIIb.16	Fontibacterium commune	97.59	0	0	MAG	GCA_965236135
N-Mw10-20nov23-C54	d__Bacteria;p__Pseudomonadota;c__Alphaproteobacteria;o__Pelagibacterales;f__Pelagibacteraceae;g__Fonsibacter;s__Fonsibacter sp016882185	SAR11-IIIb.16	Fontibacterium commune	54.72	0	0	MAG	GCA_965244035
N-Mw15-23nov23-C63	d__Bacteria;p__Pseudomonadota;c__Alphaproteobacteria;o__Pelagibacterales;f__Pelagibacteraceae;g__Fonsibacter;s__Fonsibacter sp016882185	SAR11-IIIb.16	Fontibacterium commune	52.83	0	0	MAG	GCA_965244865
LSUCC0530	d__Bacteria;p__Pseudomonadota;c__Alphaproteobacteria;o__Pelagibacterales;f__Pelagibacteraceae;g__Fonsibacter;s__Fonsibacter ubiquis	SAR11-IIIb.16	Fontibacterium commune	100	0	0	Culture	GCF_002688585.1
EUL_008	d__Bacteria;p__Pseudomonadota;c__Alphaproteobacteria;o__Pelagibacterales;f__Pelagibacteraceae;g__Fonsibacter;s__Fonsibacter sp947497305	SAR11-IIIb.15	Fontibacterium oligotrophicum	89.76	1.28	100	MAG	GCA_040404105.1
EUL_009	d__Bacteria;p__Pseudomonadota;c__Alphaproteobacteria;o__Pelagibacterales;f__Pelagibacteraceae;g__Fonsibacter;s__Fonsibacter sp947497305	SAR11-IIIb.15	Fontibacterium oligotrophicum	89.16	0	0	MAG	GCA_040404125.1
ErkenSummer_bin-6361	d__Bacteria;p__Pseudomonadota;c__Alphaproteobacteria;o__Pelagibacterales;f__Pelagibacteraceae;g__Fonsibacter;s__Fonsibacter sp947497305	SAR11-IIIb.15	Fontibacterium oligotrophicum	71.69	4.22	75	MAG	GCA_903928535.1
ZE-17mar17-120	d__Bacteria;p__Pseudomonadota;c__Alphaproteobacteria;o__Pelagibacterales;f__Pelagibacteraceae;g__Fonsibacter;s__Fonsibacter sp947497305	SAR11-IIIb.15	Fontibacterium oligotrophicum	71.19	1.81	100	MAG	GCA_947488995.1
ZH-13may13-13	d__Bacteria;p__Pseudomonadota;c__Alphaproteobacteria;o__Pelagibacterales;f__Pelagibacteraceae;g__Fonsibacter;s__Fonsibacter sp947497305	SAR11-IIIb.15	Fontibacterium oligotrophicum	77.11	1.81	100	MAG	GCA_947497305.1
ZE-13nov19-LR-47	d__Bacteria;p__Pseudomonadota;c__Alphaproteobacteria;o__Pelagibacterales;f__Pelagibacteraceae;g__Fonsibacter;s__Fonsibacter sp947497305	SAR11-IIIb.15	Fontibacterium oligotrophicum	90.96	0	0	MAG	GCA_964203215.1
ZE-03apr19-113	d__Bacteria;p__Pseudomonadota;c__Alphaproteobacteria;o__Pelagibacterales;f__Pelagibacteraceae;g__Fonsibacter;s__Fonsibacter sp947497305	SAR11-IIIb.15	Fontibacterium oligotrophicum	49.4	2.63	75	MAG	GCA_965235135
MoE-23oct19-200	d__Bacteria;p__Pseudomonadota;c__Alphaproteobacteria;o__Pelagibacterales;f__Pelagibacteraceae;g__Fonsibacter;s__Fonsibacter sp947497305	SAR11-IIIb.15	Fontibacterium oligotrophicum	64.24	0.67	100	MAG	GCA_965235195
MsH-30jul19-279	d__Bacteria;p__Pseudomonadota;c__Alphaproteobacteria;o__Pelagibacterales;f__Pelagibacteraceae;g__Fonsibacter;s__Fonsibacter sp947497305	SAR11-IIIb.15	Fontibacterium oligotrophicum	59.26	0.07	100	MAG	GCA_965235205
MsE-30jul19-LR-117	d__Bacteria;p__Pseudomonadota;c__Alphaproteobacteria;o__Pelagibacterales;f__Pelagibacteraceae;g__Fonsibacter;s__Fonsibacter sp947497305	SAR11-IIIb.15	Fontibacterium oligotrophicum	74.1	0	0	MAG	GCA_965235215
MH-08apr19-64	d__Bacteria;p__Pseudomonadota;c__Alphaproteobacteria;o__Pelagibacterales;f__Pelagibacteraceae;g__Fonsibacter;s__Fonsibacter sp947497305	SAR11-IIIb.15	Fontibacterium oligotrophicum	46.23	0	0	MAG	GCA_965235265
TE-11nov19-176	d__Bacteria;p__Pseudomonadota;c__Alphaproteobacteria;o__Pelagibacterales;f__Pelagibacteraceae;g__Fonsibacter;s__Fonsibacter sp947497305	SAR11-IIIb.15	Fontibacterium oligotrophicum	63.1	1.81	50	MAG	GCA_965235315
MoH-02may19-18	d__Bacteria;p__Pseudomonadota;c__Alphaproteobacteria;o__Pelagibacterales;f__Pelagibacteraceae;g__Fonsibacter;s__Fonsibacter sp947497305	SAR11-IIIb.15	Fontibacterium oligotrophicum	45.84	0	0	MAG	GCA_965235325
MoH-23oct19-67	d__Bacteria;p__Pseudomonadota;c__Alphaproteobacteria;o__Pelagibacterales;f__Pelagibacteraceae;g__Fonsibacter;s__Fonsibacter sp947497305	SAR11-IIIb.15	Fontibacterium oligotrophicum	53.19	0.22	50	MAG	GCA_965235375
MoE-02may19-143	d__Bacteria;p__Pseudomonadota;c__Alphaproteobacteria;o__Pelagibacterales;f__Pelagibacteraceae;g__Fonsibacter;s__Fonsibacter sp947497305	SAR11-IIIb.15	Fontibacterium oligotrophicum	52.25	1.2	100	MAG	GCA_965235385
TE-08apr19-126	d__Bacteria;p__Pseudomonadota;c__Alphaproteobacteria;o__Pelagibacterales;f__Pelagibacteraceae;g__Fonsibacter;s__Fonsibacter sp947497305	SAR11-IIIb.15	Fontibacterium oligotrophicum	62.05	1.99	100	MAG	GCA_965235395
TH-11nov19-251	d__Bacteria;p__Pseudomonadota;c__Alphaproteobacteria;o__Pelagibacterales;f__Pelagibacteraceae;g__Fonsibacter;s__Fonsibacter sp947497305	SAR11-IIIb.15	Fontibacterium oligotrophicum	49.4	0.27	100	MAG	GCA_965235405
ME-04may21-LR-119	d__Bacteria;p__Pseudomonadota;c__Alphaproteobacteria;o__Pelagibacterales;f__Pelagibacteraceae;g__Fonsibacter;s__Fonsibacter sp947497305	SAR11-IIIb.15	Fontibacterium oligotrophicum	77.11	0	0	MAG	GCA_965235495
MaE-04nov19-36	d__Bacteria;p__Pseudomonadota;c__Alphaproteobacteria;o__Pelagibacterales;f__Pelagibacteraceae;g__Fonsibacter;s__Fonsibacter sp947497305	SAR11-IIIb.15	Fontibacterium oligotrophicum	51.93	2.41	100	MAG	GCA_965235535
LE-05nov19-58	d__Bacteria;p__Pseudomonadota;c__Alphaproteobacteria;o__Pelagibacterales;f__Pelagibacteraceae;g__Fonsibacter;s__Fonsibacter sp947497305	SAR11-IIIb.15	Fontibacterium oligotrophicum	65.07	2.03	83.33	MAG	GCA_965235575
N-Balt2-05jul22-047	d__Bacteria;p__Pseudomonadota;c__Alphaproteobacteria;o__Pelagibacterales;f__Pelagibacteraceae;g__Fonsibacter;s__Fonsibacter sp947497305	SAR11-IIIb.15	Fontibacterium oligotrophicum	96.39	0	0	MAG	GCA_965235975
MsE-M45	d__Bacteria;p__Pseudomonadota;c__Alphaproteobacteria;o__Pelagibacterales;f__Pelagibacteraceae;g__Fonsibacter;s__Fonsibacter sp947497305	SAR11-IIIb.15	Fontibacterium oligotrophicum	100	0	0	Culture	to be released after acceptance
HJW_6	d__Bacteria;p__Pseudomonadota;c__Alphaproteobacteria;o__Pelagibacterales;f__Pelagibacteraceae;g__Fonsibacter;s__Fonsibacter sp023257975	SAR11-IIIb.14	Fontibacterium subtropicum	75.05	4.82	25	MAG	GCA_023257975.1
CTOTU29332	d__Bacteria;p__Pseudomonadota;c__Alphaproteobacteria;o__Pelagibacterales;f__Pelagibacteraceae;g__Fonsibacter;s__Fonsibacter sp023257975	SAR11-IIIb.14	Fontibacterium subtropicum	96.39	1.2	100	MAG	GCA_031971185.1
altamaha_2019_sw_WHONDRS-S19S_0010_B_bin.141	d__Bacteria;p__Pseudomonadota;c__Alphaproteobacteria;o__Pelagibacterales;f__Pelagibacteraceae;g__Fonsibacter;s__Fonsibacter sp023257975	SAR11-IIIb.14	Fontibacterium subtropicum	71.32	0	0	MAG	GCA_037975725.1
SD3113_S43.metabat_2.012_sub	d__Bacteria;p__Pseudomonadota;c__Alphaproteobacteria;o__Pelagibacterales;f__Pelagibacteraceae;g__Fonsibacter;s__Fonsibacter sp038145245	SAR11-IIIb.14	Fontibacterium subtropicum	93.17	0	0	MAG	GCA_038145245.1
SRR5997543_bin_19_CONCOCT_v1_1	d__Bacteria;p__Pseudomonadota;c__Alphaproteobacteria;o__Pelagibacterales;f__Pelagibacteraceae;g__Fonsibacter;s__Fonsibacter sp023257975	SAR11-IIIb.14	Fontibacterium subtropicum	100	5.42	12.5	MAG	GCA_937864075.1
N-BarE-26apr23-064	d__Bacteria;p__Pseudomonadota;c__Alphaproteobacteria;o__Pelagibacterales;f__Pelagibacteraceae;g__Fonsibacter;s__Fonsibacter sp023257975	SAR11-IIIb.14	Fontibacterium subtropicum	75.9	0	0	MAG	GCA_965235275
N-SamH-20apr23-026	d__Bacteria;p__Pseudomonadota;c__Alphaproteobacteria;o__Pelagibacterales;f__Pelagibacteraceae;g__Fonsibacter;s__Fonsibacter sp023257975	SAR11-IIIb.14	Fontibacterium subtropicum	98.8	1.2	100	MAG	GCA_965235415
N-LaBr-23jan24-080	d__Bacteria;p__Pseudomonadota;c__Alphaproteobacteria;o__Pelagibacterales;f__Pelagibacteraceae;g__Fonsibacter;s__Fonsibacter sp023257975	SAR11-IIIb.14	Fontibacterium subtropicum	89.16	0	0	MAG	GCA_965236115
WB7_2A_005	d__Bacteria;p__Pseudomonadota;c__Alphaproteobacteria;o__Pelagibacterales;f__Pelagibacteraceae;g__Fonsibacter;s__Fonsibacter sp023257975	SAR11-IIIb.14	Fontibacterium subtropicum	70.1	12.05	47.37	MAG	GCA_012064375.1
WB7_2B_006	d__Bacteria;p__Pseudomonadota;c__Alphaproteobacteria;o__Pelagibacterales;f__Pelagibacteraceae;g__Fonsibacter;s__Fonsibacter sp023257975	SAR11-IIIb.14	Fontibacterium subtropicum	71.51	7.3	81.82	MAG	GCA_012064425.1
WB7_6_001	d__Bacteria;p__Pseudomonadota;c__Alphaproteobacteria;o__Pelagibacterales;f__Pelagibacteraceae;g__Fonsibacter;s__Fonsibacter lacus	SAR11-IIIb.13	Fontibacterium lacus	74.59	0.11	0	MAG	GCA_009917785.1
WB6_2B_004	d__Bacteria;p__Pseudomonadota;c__Alphaproteobacteria;o__Pelagibacterales;f__Pelagibacteraceae;g__Fonsibacter;s__Fonsibacter lacus	SAR11-IIIb.13	Fontibacterium lacus	74.99	0.6	100	MAG	GCA_009918335.1
WB6_2A_004	d__Bacteria;p__Pseudomonadota;c__Alphaproteobacteria;o__Pelagibacterales;f__Pelagibacteraceae;g__Fonsibacter;s__Fonsibacter lacus	SAR11-IIIb.13	Fontibacterium lacus	67.22	0.11	0	MAG	GCA_009919065.1
WB6_6_002	d__Bacteria;p__Pseudomonadota;c__Alphaproteobacteria;o__Pelagibacterales;f__Pelagibacteraceae;g__Fonsibacter;s__Fonsibacter lacus	SAR11-IIIb.13	Fontibacterium lacus	75.5	1.31	50	MAG	GCA_009919525.1
WB6_3A_008	d__Bacteria;p__Pseudomonadota;c__Alphaproteobacteria;o__Pelagibacterales;f__Pelagibacteraceae;g__Fonsibacter;s__Fonsibacter lacus	SAR11-IIIb.13	Fontibacterium lacus	59.13	0	0	MAG	GCA_009919695.1
WB6_3B_008	d__Bacteria;p__Pseudomonadota;c__Alphaproteobacteria;o__Pelagibacterales;f__Pelagibacteraceae;g__Fonsibacter;s__Fonsibacter lacus	SAR11-IIIb.13	Fontibacterium lacus	69.28	3.72	75	MAG	GCA_009919775.1
LLD_006	d__Bacteria;p__Pseudomonadota;c__Alphaproteobacteria;o__Pelagibacterales;f__Pelagibacteraceae;g__Fonsibacter;s__Fonsibacter lacus	SAR11-IIIb.13	Fontibacterium lacus	81.93	1.2	0	MAG	GCA_009927895.1
WB8_2B_005	d__Bacteria;p__Pseudomonadota;c__Alphaproteobacteria;o__Pelagibacterales;f__Pelagibacteraceae;g__Fonsibacter;s__Fonsibacter lacus	SAR11-IIIb.13	Fontibacterium lacus	87.64	3.23	60	MAG	GCA_010020645.1
WB8_2A_004	d__Bacteria;p__Pseudomonadota;c__Alphaproteobacteria;o__Pelagibacterales;f__Pelagibacteraceae;g__Fonsibacter;s__Fonsibacter lacus	SAR11-IIIb.13	Fontibacterium lacus	78.92	1.64	62.5	MAG	GCA_010020685.1
WB8_1A_003	d__Bacteria;p__Pseudomonadota;c__Alphaproteobacteria;o__Pelagibacterales;f__Pelagibacteraceae;g__Fonsibacter;s__Fonsibacter lacus	SAR11-IIIb.13	Fontibacterium lacus	70.46	0.6	0	MAG	GCA_010020745.1
WB7_2A_002	d__Bacteria;p__Pseudomonadota;c__Alphaproteobacteria;o__Pelagibacterales;f__Pelagibacteraceae;g__Fonsibacter;s__Fonsibacter lacus	SAR11-IIIb.13	Fontibacterium lacus	84.27	0	0	MAG	GCA_010021085.1
WB7_2B_003	d__Bacteria;p__Pseudomonadota;c__Alphaproteobacteria;o__Pelagibacterales;f__Pelagibacteraceae;g__Fonsibacter;s__Fonsibacter lacus	SAR11-IIIb.13	Fontibacterium lacus	78.51	0	0	MAG	GCA_010021105.1
WB7_1B_004	d__Bacteria;p__Pseudomonadota;c__Alphaproteobacteria;o__Pelagibacterales;f__Pelagibacteraceae;g__Fonsibacter;s__Fonsibacter lacus	SAR11-IIIb.13	Fontibacterium lacus	72.69	1.48	0	MAG	GCA_010021125.1
WB7_1C_004	d__Bacteria;p__Pseudomonadota;c__Alphaproteobacteria;o__Pelagibacterales;f__Pelagibacteraceae;g__Fonsibacter;s__Fonsibacter lacus	SAR11-IIIb.13	Fontibacterium lacus	70.75	2.57	0	MAG	GCA_010021135.1
WB8_6_001	d__Bacteria;p__Pseudomonadota;c__Alphaproteobacteria;o__Pelagibacterales;f__Pelagibacteraceae;g__Fonsibacter;s__Fonsibacter lacus	SAR11-IIIb.13	Fontibacterium lacus	81.33	0.31	0	MAG	GCA_010021145.1
WBA_1A_005	d__Bacteria;p__Pseudomonadota;c__Alphaproteobacteria;o__Pelagibacterales;f__Pelagibacteraceae;g__Fonsibacter;s__Fonsibacter lacus	SAR11-IIIb.13	Fontibacterium lacus	81.33	3.01	100	MAG	GCA_010026345.1
WB9_2_006	d__Bacteria;p__Pseudomonadota;c__Alphaproteobacteria;o__Pelagibacterales;f__Pelagibacteraceae;g__Fonsibacter;s__Fonsibacter lacus	SAR11-IIIb.13	Fontibacterium lacus	77.17	2.52	66.67	MAG	GCA_010027195.1
WB9_1B_004	d__Bacteria;p__Pseudomonadota;c__Alphaproteobacteria;o__Pelagibacterales;f__Pelagibacteraceae;g__Fonsibacter;s__Fonsibacter lacus	SAR11-IIIb.13	Fontibacterium lacus	80.32	0.44	100	MAG	GCA_010029375.1
WB9_1A_004	d__Bacteria;p__Pseudomonadota;c__Alphaproteobacteria;o__Pelagibacterales;f__Pelagibacteraceae;g__Fonsibacter;s__Fonsibacter lacus	SAR11-IIIb.13	Fontibacterium lacus	75.61	1.61	100	MAG	GCA_010029435.1
WBA_1B_005	d__Bacteria;p__Pseudomonadota;c__Alphaproteobacteria;o__Pelagibacterales;f__Pelagibacteraceae;g__Fonsibacter;s__Fonsibacter lacus	SAR11-IIIb.13	Fontibacterium lacus	76.12	0	0	MAG	GCA_010032115.1
pamunkeyriver_2019_sw_WHONDRS-S19S_0054_B_bin.46	d__Bacteria;p__Pseudomonadota;c__Alphaproteobacteria;o__Pelagibacterales;f__Pelagibacteraceae;g__Fonsibacter;s__Fonsibacter lacus	SAR11-IIIb.13	Fontibacterium lacus	69.28	1.46	50	MAG	GCA_041180725.1
N-SamH-20apr23-C70	d__Bacteria;p__Pseudomonadota;c__Alphaproteobacteria;o__Pelagibacterales;f__Pelagibacteraceae;g__Fonsibacter;s__Fonsibacter lacus	SAR11-IIIb.13	Fontibacterium lacus	57.83	0	0	MAG	GCA_965243965
N-BarE-26apr23-C31	d__Bacteria;p__Pseudomonadota;c__Alphaproteobacteria;o__Pelagibacterales;f__Pelagibacteraceae;g__Fonsibacter;s__Fonsibacter lacus	SAR11-IIIb.13	Fontibacterium lacus	98.8	0	0	MAG	GCA_965244475
UppL7s_bin-0991	d__Bacteria;p__Pseudomonadota;c__Alphaproteobacteria;o__Pelagibacterales;f__Pelagibacteraceae;g__Fonsibacter;s__Fonsibacter sp000419465	SAR11-IIIb.13	Fontibacterium lacus	66.36	2.48	100	MAG	GCA_903838235.1
SRR1790644_concoct_28	d__Bacteria;p__Pseudomonadota;c__Alphaproteobacteria;o__Pelagibacterales;f__Pelagibacteraceae;g__Fonsibacter;s__Fonsibacter sp963978385	SAR11-IIIb.12	Fontibacterium meridianamericanum	96.39	0	0	MAG	GCA_963978385.1
N-IMU-22jan24-050	d__Bacteria;p__Pseudomonadota;c__Alphaproteobacteria;o__Pelagibacterales;f__Pelagibacteraceae;g__Fonsibacter;s__Fonsibacter sp963978385	SAR11-IIIb.12	Fontibacterium meridianamericanum	95.78	1.2	100	MAG	GCA_965235635
SCGC_AAA280-P20	d__Bacteria;p__Pseudomonadota;c__Alphaproteobacteria;o__Pelagibacterales;f__Pelagibacteraceae;g__Fonsibacter;s__Fonsibacter sp000371845	SAR11-IIIb.11	Fontibacterium universale	65.06	0	0	SAG	GCA_000371845.1
WB5_1B_032	d__Bacteria;p__Pseudomonadota;c__Alphaproteobacteria;o__Pelagibacterales;f__Pelagibacteraceae;g__Fonsibacter;s__Fonsibacter sp000371845	SAR11-IIIb.11	Fontibacterium universale	51	0	0	MAG	GCA_009922365.1
EUL_007	d__Bacteria;p__Pseudomonadota;c__Alphaproteobacteria;o__Pelagibacterales;f__Pelagibacteraceae;g__Fonsibacter;s__Fonsibacter sp000371845	SAR11-IIIb.11	Fontibacterium universale	88.44	0	0	MAG	GCA_040404145.1
EUL_006	d__Bacteria;p__Pseudomonadota;c__Alphaproteobacteria;o__Pelagibacterales;f__Pelagibacteraceae;g__Fonsibacter;s__Fonsibacter sp000371845	SAR11-IIIb.11	Fontibacterium universale	92.17	0	0	MAG	GCA_040404205.1
LJ-3-15m_bin-0070	d__Bacteria;p__Pseudomonadota;c__Alphaproteobacteria;o__Pelagibacterales;f__Pelagibacteraceae;g__Fonsibacter;s__Fonsibacter sp000371845	SAR11-IIIb.11	Fontibacterium universale	83.46	2.59	75	MAG	GCA_903830505.1
LJ-7-9m_bin-1186	d__Bacteria;p__Pseudomonadota;c__Alphaproteobacteria;o__Pelagibacterales;f__Pelagibacteraceae;g__Fonsibacter;s__Fonsibacter sp000371845	SAR11-IIIb.11	Fontibacterium universale	75.3	0.78	66.67	MAG	GCA_903832645.1
LinL5_bin-0670	d__Bacteria;p__Pseudomonadota;c__Alphaproteobacteria;o__Pelagibacterales;f__Pelagibacteraceae;g__Fonsibacter;s__Fonsibacter sp000371845	SAR11-IIIb.11	Fontibacterium universale	75.79	3.32	91.67	MAG	GCA_903846225.1
LJ_bin-0735	d__Bacteria;p__Pseudomonadota;c__Alphaproteobacteria;o__Pelagibacterales;f__Pelagibacteraceae;g__Fonsibacter;s__Fonsibacter sp000371845	SAR11-IIIb.11	Fontibacterium universale	83.32	4.93	80	MAG	GCA_903877195.1
HRS-ES1-bin-133	d__Bacteria;p__Pseudomonadota;c__Alphaproteobacteria;o__Pelagibacterales;f__Pelagibacteraceae;g__Fonsibacter;s__Fonsibacter sp000371845	SAR11-IIIb.11	Fontibacterium universale	73.18	3.72	100	MAG	GCA_943324135.2
HRS-ES8-bin-134	d__Bacteria;p__Pseudomonadota;c__Alphaproteobacteria;o__Pelagibacterales;f__Pelagibacteraceae;g__Fonsibacter;s__Fonsibacter sp000371845	SAR11-IIIb.11	Fontibacterium universale	68.67	1.03	66.67	MAG	GCA_943324155.2
HRS-ES1-bin-364	d__Bacteria;p__Pseudomonadota;c__Alphaproteobacteria;o__Pelagibacterales;f__Pelagibacteraceae;g__Fonsibacter;s__Fonsibacter sp000371845	SAR11-IIIb.11	Fontibacterium universale	67.54	1.81	100	MAG	GCA_943325395.2
HRS-ES11-bin-97	d__Bacteria;p__Pseudomonadota;c__Alphaproteobacteria;o__Pelagibacterales;f__Pelagibacteraceae;g__Fonsibacter;s__Fonsibacter sp000371845	SAR11-IIIb.11	Fontibacterium universale	77.11	1.53	100	MAG	GCA_943325585.2
HRS-ES5-bin-60	d__Bacteria;p__Pseudomonadota;c__Alphaproteobacteria;o__Pelagibacterales;f__Pelagibacteraceae;g__Fonsibacter;s__Fonsibacter sp000371845	SAR11-IIIb.11	Fontibacterium universale	66.43	3.08	100	MAG	GCA_943327345.2
HRS-HS3-bin-110	d__Bacteria;p__Pseudomonadota;c__Alphaproteobacteria;o__Pelagibacterales;f__Pelagibacteraceae;g__Fonsibacter;s__Fonsibacter sp000371845	SAR11-IIIb.11	Fontibacterium universale	58.71	0	0	MAG	GCA_943328195.2
N-InaE-25sep22-010	d__Bacteria;p__Pseudomonadota;c__Alphaproteobacteria;o__Pelagibacterales;f__Pelagibacteraceae;g__Fonsibacter;s__Fonsibacter sp000371845	SAR11-IIIb.11	Fontibacterium universale	98.8	0	0	MAG	GCA_965236175
Loc080925-4-5m_bin-0225	d__Bacteria;p__Pseudomonadota;c__Alphaproteobacteria;o__Pelagibacterales;f__Pelagibacteraceae;g__Fonsibacter;s__Fonsibacter sp000419465	SAR11-IIIb.11	Fontibacterium universale	63.28	2.74	71.43	MAG	GCA_903938155.1
WB5_1A_027	d__Bacteria;p__Pseudomonadota;c__Alphaproteobacteria;o__Pelagibacterales;f__Pelagibacteraceae;g__Fonsibacter;s__Fonsibacter sp000371845	SAR11-IIIb.11	Fontibacterium universale	64.64	0.33	100	MAG	GCA_009923385.1
SCGC_AAA487-M09	d__Bacteria;p__Pseudomonadota;c__Alphaproteobacteria;o__Pelagibacterales;f__Pelagibacteraceae;g__Fonsibacter;s__Fonsibacter sp000371845	SAR11-IIIb.11	Fontibacterium universale	53.15	3.72	100	SAG	GCA_000419485.1
3300026931-2	d__Bacteria;p__Pseudomonadota;c__Alphaproteobacteria;o__Pelagibacterales;f__Pelagibacteraceae;g__Fonsibacter;s__Fonsibacter sp000510845	SAR11-IIIb.10	Fontibacterium temperatum	81.93	1.86	0	MAG	3300026931_2
3300027147-14	d__Bacteria;p__Pseudomonadota;c__Alphaproteobacteria;o__Pelagibacterales;f__Pelagibacteraceae;g__Fonsibacter;s__Fonsibacter sp000510845	SAR11-IIIb.10	Fontibacterium temperatum	68.56	3.01	100	MAG	3300027147_14
3300027149-15	d__Bacteria;p__Pseudomonadota;c__Alphaproteobacteria;o__Pelagibacterales;f__Pelagibacteraceae;g__Fonsibacter;s__Fonsibacter sp000510845	SAR11-IIIb.10	Fontibacterium temperatum	60.17	0	0	MAG	3300027149_15
3300027150-18	d__Bacteria;p__Pseudomonadota;c__Alphaproteobacteria;o__Pelagibacterales;f__Pelagibacteraceae;g__Fonsibacter;s__Fonsibacter sp000510845	SAR11-IIIb.10	Fontibacterium temperatum	67.36	0	0	MAG	3300027150_18
3300027211-13	d__Bacteria;p__Pseudomonadota;c__Alphaproteobacteria;o__Pelagibacterales;f__Pelagibacteraceae;g__Fonsibacter;s__Fonsibacter sp000510845	SAR11-IIIb.10	Fontibacterium temperatum	57.39	0.11	100	MAG	3300027211_13
3300027224-14	d__Bacteria;p__Pseudomonadota;c__Alphaproteobacteria;o__Pelagibacterales;f__Pelagibacteraceae;g__Fonsibacter;s__Fonsibacter sp000510845	SAR11-IIIb.10	Fontibacterium temperatum	54.02	0	0	MAG	3300027224_14
3300027563-31	d__Bacteria;p__Pseudomonadota;c__Alphaproteobacteria;o__Pelagibacterales;f__Pelagibacteraceae;g__Fonsibacter;s__Fonsibacter sp000510845	SAR11-IIIb.10	Fontibacterium temperatum	55.37	0	0	MAG	3300027563_31
3300027688-45	d__Bacteria;p__Pseudomonadota;c__Alphaproteobacteria;o__Pelagibacterales;f__Pelagibacteraceae;g__Fonsibacter;s__Fonsibacter sp000510845	SAR11-IIIb.10	Fontibacterium temperatum	69.44	2.52	66.67	MAG	3300027688_45
3300027756-64	d__Bacteria;p__Pseudomonadota;c__Alphaproteobacteria;o__Pelagibacterales;f__Pelagibacteraceae;g__Fonsibacter;s__Fonsibacter sp000510845	SAR11-IIIb.10	Fontibacterium temperatum	77.51	2.41	100	MAG	3300027756_64
3300027940-3	d__Bacteria;p__Pseudomonadota;c__Alphaproteobacteria;o__Pelagibacterales;f__Pelagibacteraceae;g__Fonsibacter;s__Fonsibacter sp000510845	SAR11-IIIb.10	Fontibacterium temperatum	71.93	0.29	33.33	MAG	3300027940-3
SCGC_AAA028-D10	d__Bacteria;p__Pseudomonadota;c__Alphaproteobacteria;o__Pelagibacterales;f__Pelagibacteraceae;g__Fonsibacter;s__Fonsibacter sp000510845	SAR11-IIIb.10	Fontibacterium temperatum	81.64	0.07	0	SAG	GCA_000510845.1
LBMAG_Alphaproteobacteria_hypo.bin1_LD12	d__Bacteria;p__Pseudomonadota;c__Alphaproteobacteria;o__Pelagibacterales;f__Pelagibacteraceae;g__Fonsibacter;s__Fonsibacter sp000510845	SAR11-IIIb.10	Fontibacterium temperatum	86.75	2.48	66.67	MAG	GCA_014190415.1
SupBloom_Metag_065	d__Bacteria;p__Pseudomonadota;c__Alphaproteobacteria;o__Pelagibacterales;f__Pelagibacteraceae;g__Fonsibacter;s__Fonsibacter sp000510845	SAR11-IIIb.10	Fontibacterium temperatum	77.6	0	0	MAG	GCA_016463655.1
Con-12	d__Bacteria;p__Pseudomonadota;c__Alphaproteobacteria;o__Pelagibacterales;f__Pelagibacteraceae;g__Fonsibacter;s__Fonsibacter sp000510845	SAR11-IIIb.10	Fontibacterium temperatum	76.51	1.56	85.71	MAG	GCA_019264585.1
LacPavin_0818_WC45_MAG_30_15	d__Bacteria;p__Pseudomonadota;c__Alphaproteobacteria;o__Pelagibacterales;f__Pelagibacteraceae;g__Fonsibacter;s__Fonsibacter sp000510845	SAR11-IIIb.10	Fontibacterium temperatum	89.16	4.73	66.67	MAG	GCA_026400675.1
CTOTU14216	d__Bacteria;p__Pseudomonadota;c__Alphaproteobacteria;o__Pelagibacterales;f__Pelagibacteraceae;g__Fonsibacter;s__Fonsibacter sp000510845	SAR11-IIIb.10	Fontibacterium temperatum	96.39	0	0	MAG	GCA_031973455.1
CTOTU26813	d__Bacteria;p__Pseudomonadota;c__Alphaproteobacteria;o__Pelagibacterales;f__Pelagibacteraceae;g__Fonsibacter;s__Fonsibacter sp000510845	SAR11-IIIb.10	Fontibacterium temperatum	96.39	0	0	MAG	GCA_036719255.1
CTOTU14294	d__Bacteria;p__Pseudomonadota;c__Alphaproteobacteria;o__Pelagibacterales;f__Pelagibacteraceae;g__Fonsibacter;s__Fonsibacter sp000510845	SAR11-IIIb.10	Fontibacterium temperatum	92.17	0	0	MAG	GCA_036792305.1
CTOTU26804	d__Bacteria;p__Pseudomonadota;c__Alphaproteobacteria;o__Pelagibacterales;f__Pelagibacteraceae;g__Fonsibacter;s__Fonsibacter sp000510845	SAR11-IIIb.10	Fontibacterium temperatum	94.58	0	0	MAG	GCA_036800285.1
CTOTU14299	d__Bacteria;p__Pseudomonadota;c__Alphaproteobacteria;o__Pelagibacterales;f__Pelagibacteraceae;g__Fonsibacter;s__Fonsibacter sp000510845	SAR11-IIIb.10	Fontibacterium temperatum	84.94	0	0	MAG	GCA_036800305.1
EUL_004	d__Bacteria;p__Pseudomonadota;c__Alphaproteobacteria;o__Pelagibacterales;f__Pelagibacteraceae;g__Fonsibacter;s__Fonsibacter sp000510845	SAR11-IIIb.10	Fontibacterium temperatum	90.36	1.2	100	MAG	GCA_040404165.1
columbiariver1_2019_sw_WHONDRS-S19S_0075_B_bin.55	d__Bacteria;p__Pseudomonadota;c__Alphaproteobacteria;o__Pelagibacterales;f__Pelagibacteraceae;g__Fonsibacter;s__Fonsibacter sp000510845	SAR11-IIIb.10	Fontibacterium temperatum	70.34	3.61	100	MAG	GCA_041168245.1
columbia_2019_sw_WHONDRS-S19S_0036_B_bin.52	d__Bacteria;p__Pseudomonadota;c__Alphaproteobacteria;o__Pelagibacterales;f__Pelagibacteraceae;g__Fonsibacter;s__Fonsibacter sp000510845	SAR11-IIIb.10	Fontibacterium temperatum	65.06	0	0	MAG	GCA_041168765.1
MoE-02may19-314	d__Bacteria;p__Pseudomonadota;c__Alphaproteobacteria;o__Pelagibacterales;f__Pelagibacteraceae;g__Fonsibacter;s__Fonsibacter sp000510845	SAR11-IIIb.10	Fontibacterium temperatum	80.39	3.27	100	MAG	GCA_945901925.1
ZE-17mar17-39	d__Bacteria;p__Pseudomonadota;c__Alphaproteobacteria;o__Pelagibacterales;f__Pelagibacteraceae;g__Fonsibacter;s__Fonsibacter sp000510845	SAR11-IIIb.10	Fontibacterium temperatum	61.45	0	0	MAG	GCA_947503295.1
ZE-03apr19-LR-3	d__Bacteria;p__Pseudomonadota;c__Alphaproteobacteria;o__Pelagibacterales;f__Pelagibacteraceae;g__Fonsibacter;s__Fonsibacter sp000510845	SAR11-IIIb.10	Fontibacterium temperatum	93.98	0	0	MAG	GCA_964203055.1
ME-04may21-LR-249	d__Bacteria;p__Pseudomonadota;c__Alphaproteobacteria;o__Pelagibacterales;f__Pelagibacteraceae;g__Fonsibacter;s__	SAR11-IIIb.10	Fontibacterium temperatum	60.24	3.61	100	MAG	GCA_964203195.1
ZE-13nov19-LR-1	d__Bacteria;p__Pseudomonadota;c__Alphaproteobacteria;o__Pelagibacterales;f__Pelagibacteraceae;g__Fonsibacter;s__Fonsibacter sp000510845	SAR11-IIIb.10	Fontibacterium temperatum	95.18	1.2	100	MAG	GCA_965235175
MoH-23oct19-50	d__Bacteria;p__Pseudomonadota;c__Alphaproteobacteria;o__Pelagibacterales;f__Pelagibacteraceae;g__Fonsibacter;s__Fonsibacter sp000510845	SAR11-IIIb.10	Fontibacterium temperatum	68.67	2.74	66.67	MAG	GCA_965235245
MsE-30jul19-LR-39	d__Bacteria;p__Pseudomonadota;c__Alphaproteobacteria;o__Pelagibacterales;f__Pelagibacteraceae;g__Fonsibacter;s__Fonsibacter sp000510845	SAR11-IIIb.10	Fontibacterium temperatum	91.57	4.82	100	MAG	GCA_965235335
TrE-25oct19-80	d__Bacteria;p__Pseudomonadota;c__Alphaproteobacteria;o__Pelagibacterales;f__Pelagibacteraceae;g__Fonsibacter;s__	SAR11-IIIb.10	Fontibacterium temperatum	48.16	2.92	100	MAG	GCA_965235505
ME-04may21-LR-172	d__Bacteria;p__Pseudomonadota;c__Alphaproteobacteria;o__Pelagibacterales;f__Pelagibacteraceae;g__Fonsibacter;s__	SAR11-IIIb.10	Fontibacterium temperatum	49.06	15.09	100	MAG	GCA_965235565
N-BiE-22sep22-080	d__Bacteria;p__Pseudomonadota;c__Alphaproteobacteria;o__Pelagibacterales;f__Pelagibacteraceae;g__Fonsibacter;s__	SAR11-IIIb.10	Fontibacterium temperatum	80.12	1.81	50	MAG	GCA_965235815
N-ChE-26sep22-047	d__Bacteria;p__Pseudomonadota;c__Alphaproteobacteria;o__Pelagibacterales;f__Pelagibacteraceae;g__Fonsibacter;s__Fonsibacter sp000510845	SAR11-IIIb.10	Fontibacterium temperatum	89.16	4.82	100	MAG	GCA_965235905
N-Balt3-05jul22-020	d__Bacteria;p__Pseudomonadota;c__Alphaproteobacteria;o__Pelagibacterales;f__Pelagibacteraceae;g__Fonsibacter;s__Fonsibacter sp000419465	SAR11-IIIb.10	Fontibacterium temperatum	51.81	1.81	50	MAG	GCA_965235945
N-BiH-22sep22-023	d__Bacteria;p__Pseudomonadota;c__Alphaproteobacteria;o__Pelagibacterales;f__Pelagibacteraceae;g__Fonsibacter;s__Fonsibacter sp000510845	SAR11-IIIb.10	Fontibacterium temperatum	98.8	21.69	90.48	MAG	GCA_965236145
N-InaH-25sep22-023	d__Bacteria;p__Pseudomonadota;c__Alphaproteobacteria;o__Pelagibacterales;f__Pelagibacteraceae;g__Fonsibacter;s__	SAR11-IIIb.10	Fontibacterium temperatum	68.67	3.61	66.67	MAG	GCA_965236185
N-ToyH-29sep22-008	d__Bacteria;p__Pseudomonadota;c__Alphaproteobacteria;o__Pelagibacterales;f__Pelagibacteraceae;g__Fonsibacter;s__Fonsibacter sp000510845	SAR11-IIIb.10	Fontibacterium temperatum	85.54	2.41	100	MAG	GCA_965236195
N-ToyE-29sep22-012	d__Bacteria;p__Pseudomonadota;c__Alphaproteobacteria;o__Pelagibacterales;f__Pelagibacteraceae;g__Fonsibacter;s__	SAR11-IIIb.10	Fontibacterium temperatum	96.39	12.65	100	MAG	GCA_965236205
N-ChH-26sep22-024	d__Bacteria;p__Pseudomonadota;c__Alphaproteobacteria;o__Pelagibacterales;f__Pelagibacteraceae;g__Fonsibacter;s__Fonsibacter sp000510845	SAR11-IIIb.10	Fontibacterium temperatum	68.67	0	0	MAG	GCA_965236215
GE-M19	d__Bacteria;p__Pseudomonadota;c__Alphaproteobacteria;o__Pelagibacterales;f__Pelagibacteraceae;g__Fonsibacter;s__Fonsibacter sp000510845	SAR11-IIIb.10	Fontibacterium temperatum	98.8	0	0	Culture	to be released after acceptance
MaE-M19	d__Bacteria;p__Pseudomonadota;c__Alphaproteobacteria;o__Pelagibacterales;f__Pelagibacteraceae;g__Fonsibacter;s__Fonsibacter sp000510845	SAR11-IIIb.10	Fontibacterium temperatum	98.8	0	0	Culture	to be released after acceptance
MiH-M21	d__Bacteria;p__Pseudomonadota;c__Alphaproteobacteria;o__Pelagibacterales;f__Pelagibacteraceae;g__Fonsibacter;s__	SAR11-IIIb.10	Fontibacterium temperatum	98.8	0	0	Culture	to be released after acceptance
SCGC_AAA023-L09	d__Bacteria;p__Pseudomonadota;c__Alphaproteobacteria;o__Pelagibacterales;f__Pelagibacteraceae;g__Fonsibacter;s__Fonsibacter sp000510845	SAR11-IIIb.10	Fontibacterium temperatum	68.1	5.66	100	SAG	GCA_000419505.1
M_DeepCast_200m_m2_041	d__Bacteria;p__Pseudomonadota;c__Alphaproteobacteria;o__Pelagibacterales;f__Pelagibacteraceae;g__Fonsibacter;s__Fonsibacter sp016882225	SAR11-IIIb.1	Fontibacterium africanum	74.7	2.41	100	MAG	GCA_016882225.1
N-Mw10-20nov23-021	d__Bacteria;p__Pseudomonadota;c__Alphaproteobacteria;o__Pelagibacterales;f__Pelagibacteraceae;g__Fonsibacter;s__Fonsibacter sp016882225	SAR11-IIIb.1	Fontibacterium africanum	73.49	1.2	100	MAG	GCA_965235615
N-Mw15-23nov23-035	d__Bacteria;p__Pseudomonadota;c__Alphaproteobacteria;o__Pelagibacterales;f__Pelagibacteraceae;g__Fonsibacter;s__Fonsibacter sp016882225	SAR11-IIIb.1	Fontibacterium africanum	75.83	6.02	100	MAG	GCA_965235695
N-Mw8-13nov23-087	d__Bacteria;p__Pseudomonadota;c__Alphaproteobacteria;o__Pelagibacterales;f__Pelagibacteraceae;g__Fonsibacter;s__Fonsibacter sp016882225	SAR11-IIIb.1	Fontibacterium africanum	91.57	1.2	0	MAG	GCA_965235805
N-Mw5-13nov23-049	d__Bacteria;p__Pseudomonadota;c__Alphaproteobacteria;o__Pelagibacterales;f__Pelagibacteraceae;g__Fonsibacter;s__Fonsibacter sp016882225	SAR11-IIIb.1	Fontibacterium africanum	86.75	2.41	100	MAG	GCA_965235835
N-Mw7-13nov23-070	d__Bacteria;p__Pseudomonadota;c__Alphaproteobacteria;o__Pelagibacterales;f__Pelagibacteraceae;g__Fonsibacter;s__Fonsibacter sp016882225	SAR11-IIIb.1	Fontibacterium africanum	93.98	1.2	0	MAG	GCA_965235855
N-Mw6-13nov23-081	d__Bacteria;p__Pseudomonadota;c__Alphaproteobacteria;o__Pelagibacterales;f__Pelagibacteraceae;g__Fonsibacter;s__Fonsibacter sp016882225	SAR11-IIIb.1	Fontibacterium africanum	95.18	0	0	MAG	GCA_965235885
N-Mw2-16nov23-072	d__Bacteria;p__Pseudomonadota;c__Alphaproteobacteria;o__Pelagibacterales;f__Pelagibacteraceae;g__Fonsibacter;s__Fonsibacter sp016882225	SAR11-IIIb.1	Fontibacterium africanum	90.36	4.82	100	MAG	GCA_965235915
N-Mw13-23nov23-097	d__Bacteria;p__Pseudomonadota;c__Alphaproteobacteria;o__Pelagibacterales;f__Pelagibacteraceae;g__Fonsibacter;s__Fonsibacter sp016882225	SAR11-IIIb.1	Fontibacterium africanum	82.53	1.2	100	MAG	GCA_965235965
N-Mw11-20nov23-095	d__Bacteria;p__Pseudomonadota;c__Alphaproteobacteria;o__Pelagibacterales;f__Pelagibacteraceae;g__Fonsibacter;s__Fonsibacter sp016882225	SAR11-IIIb.1	Fontibacterium africanum	87.95	0	0	MAG	GCA_965236035
N-Mw11-20nov23-094	d__Bacteria;p__Pseudomonadota;c__Alphaproteobacteria;o__Pelagibacterales;f__Pelagibacteraceae;g__Fonsibacter;s__Fonsibacter sp016882225	SAR11-IIIb.1	Fontibacterium africanum	48.19	1.2	0	MAG	GCA_965236045
N-Mw14-23nov23-072	d__Bacteria;p__Pseudomonadota;c__Alphaproteobacteria;o__Pelagibacterales;f__Pelagibacteraceae;g__Fonsibacter;s__Fonsibacter sp016882225	SAR11-IIIb.1	Fontibacterium africanum	81.93	0	0	MAG	GCA_965236095
LSUCC0261	d__Bacteria;p__Pseudomonadota;c__Alphaproteobacteria;o__Pelagibacterales;f__Pelagibacteraceae;g__IMCC9063;s__IMCC9063 sp008638015	SAR11-IIIa		98.81	0	0	Culture	2728369215
LSUCC0723	d__Bacteria;p__Pseudomonadota;c__Alphaproteobacteria;o__Pelagibacterales;f__Pelagibacteraceae;g__HIMB114;s__	SAR11-IIIa		97.62	0	0	Culture	2739368061
LSUCC0664	d__Bacteria;p__Pseudomonadota;c__Alphaproteobacteria;o__Pelagibacterales;f__Pelagibacteraceae;g__HIMB114;s__HIMB114 sp008638005	SAR11-IIIa		97.62	0	0	Culture	2770939455
cas-150m-34	d__Bacteria;p__Pseudomonadota;c__Alphaproteobacteria;o__Pelagibacterales;f__Pelagibacteraceae;g__IMCC9063;s__IMCC9063 sp008638225	SAR11-IIIa		80.95	0.74	100	MAG	_
3300027976-91	d__Bacteria;p__Pseudomonadota;c__Alphaproteobacteria;o__Pelagibacterales;f__Pelagibacteraceae;g__IMCC9063;s__IMCC9063 sp963925905	SAR11-IIIa		92.75	3.57	80	MAG	3300027976_91
3300027983-82	d__Bacteria;p__Pseudomonadota;c__Alphaproteobacteria;o__Pelagibacterales;f__Pelagibacteraceae;g__IMCC9063;s__IMCC9063 sp963925905	SAR11-IIIa		73.56	3.57	33.33	MAG	3300027983_82
HIMB114	d__Bacteria;p__Pseudomonadota;c__Alphaproteobacteria;o__Pelagibacterales;f__Pelagibacteraceae;g__HIMB114;s__HIMB114 sp000163555	SAR11-IIIa		98.81	0	0	Culture	GCA_000163555.2
MED-G103	d__Bacteria;p__Pseudomonadota;c__Alphaproteobacteria;o__Pelagibacterales;f__Pelagibacteraceae;g__HIMB114;s__HIMB114 sp002171085	SAR11-IIIa		77.5	0	0	MAG	GCA_004213805.1
MED-G102	d__Bacteria;p__Pseudomonadota;c__Alphaproteobacteria;o__Pelagibacterales;f__Pelagibacteraceae;g__HIMB114;s__HIMB114 sp002684895	SAR11-IIIa		84.72	0	0	MAG	GCA_004321785.1
N-Balt2-05jul22-002	d__Bacteria;p__Pseudomonadota;c__Alphaproteobacteria;o__Pelagibacterales;f__Pelagibacteraceae;g__IMCC9063;s__IMCC9063 sp008638225	SAR11-IIIa		98.81	0	0	MAG	GCA_965235285
N-Balt1-05jul22-035	d__Bacteria;p__Pseudomonadota;c__Alphaproteobacteria;o__Pelagibacterales;f__Pelagibacteraceae;g__IMCC9063;s__IMCC9063 sp008638225	SAR11-IIIa		97.51	0	0	MAG	GCA_965235305
N-LaRo1-16jan24-055	d__Bacteria;p__Pseudomonadota;c__Alphaproteobacteria;o__Pelagibacterales;f__Pelagibacteraceae;g__IMCC9063;s__IMCC9063 sp008638015	SAR11-IIIa		74.01	0	0	MAG	GCA_965235645
N-Balt4-05jul22-001	d__Bacteria;p__Pseudomonadota;c__Alphaproteobacteria;o__Pelagibacterales;f__Pelagibacteraceae;g__IMCC9063;s__	SAR11-IIIa		89.29	0	0	MAG	GCA_965235655
N-LaCa2-17jan24-056	d__Bacteria;p__Pseudomonadota;c__Alphaproteobacteria;o__Pelagibacterales;f__Pelagibacteraceae;g__IMCC9063;s__IMCC9063 sp008638015	SAR11-IIIa		62.86	0	0	MAG	GCA_965235715
N-LaRo3-16jan24-067	d__Bacteria;p__Pseudomonadota;c__Alphaproteobacteria;o__Pelagibacterales;f__Pelagibacteraceae;g__IMCC9063;s__	SAR11-IIIa		67.86	2.38	100	MAG	GCA_965235735
N-LaRo1-16jan24-069	d__Bacteria;p__Pseudomonadota;c__Alphaproteobacteria;o__Pelagibacterales;f__Pelagibacteraceae;g__IMCC9063;s__	SAR11-IIIa		80.75	0	0	MAG	GCA_965235745
N-LaRo2-16jan24-084	d__Bacteria;p__Pseudomonadota;c__Alphaproteobacteria;o__Pelagibacterales;f__Pelagibacteraceae;g__IMCC9063;s__IMCC9063 sp008638225	SAR11-IIIa		92.86	0	0	MAG	GCA_965235765
N-LaRo3-16jan24-063	d__Bacteria;p__Pseudomonadota;c__Alphaproteobacteria;o__Pelagibacterales;f__Pelagibacteraceae;g__IMCC9063;s__IMCC9063 sp008638225	SAR11-IIIa		98.81	0	0	MAG	GCA_965235785
N-LaCa1-17jan24-038	d__Bacteria;p__Pseudomonadota;c__Alphaproteobacteria;o__Pelagibacterales;f__Pelagibacteraceae;g__IMCC9063;s__IMCC9063 sp008638225	SAR11-IIIa		98.81	1.19	100	MAG	GCA_965236065
N-LaCa2-17jan24-036	d__Bacteria;p__Pseudomonadota;c__Alphaproteobacteria;o__Pelagibacterales;f__Pelagibacteraceae;g__IMCC9063;s__IMCC9063 sp008638225	SAR11-IIIa		95.24	3.57	50	MAG	GCA_965236165
N-LaCa1-17jan24-C29	d__Bacteria;p__Pseudomonadota;c__Alphaproteobacteria;o__Pelagibacterales;f__Pelagibacteraceae;g__IMCC9063;s__IMCC9063 sp038146545	SAR11-IIIa		53.7	0	0	MAG	GCA_965244045
N-CoE-06may23-C26	d__Bacteria;p__Pseudomonadota;c__Alphaproteobacteria;o__Pelagibacterales;f__Pelagibacteraceae;g__IMCC9063;s__IMCC9063 sp008638015	SAR11-IIIa		51.85	0	0	MAG	GCA_965244055
N-LaCa2-17jan24-C21	d__Bacteria;p__Pseudomonadota;c__Alphaproteobacteria;o__Pelagibacterales;f__Pelagibacteraceae;g__IMCC9063;s__IMCC9063 sp038145265	SAR11-IIIa		70.24	2.38	100	MAG	GCA_965244305
N-LaRo1-16jan24-C95	d__Bacteria;p__Pseudomonadota;c__Alphaproteobacteria;o__Pelagibacterales;f__Pelagibacteraceae;g__IMCC9063;s__IMCC9063 sp008638225	SAR11-IIIa		57.41	0	0	MAG	GCA_965244655
IMCC9063	d__Bacteria;p__Pseudomonadota;c__Alphaproteobacteria;o__Pelagibacterales;f__Pelagibacteraceae;g__IMCC9063;s__IMCC9063 sp000195085	SAR11-IIIa		98.81	0	0	Culture	GCF_000195085.1
IMCC9063_QL1	d__Bacteria;p__Pseudomonadota;c__Alphaproteobacteria;o__Pelagibacterales;f__Pelagibacteraceae;g__IMCC9063;s__IMCC9063 sp000750175	SAR11-IIIa		62.65	0.11	0	Culture	_
SFB_3D_13Oct25_20_ms_bin_3	d__Bacteria;p__Pseudomonadota;c__Alphaproteobacteria;o__Pelagibacterales;f__Pelagibacteraceae;g__IMCC9063;s__IMCC9063 sp038146545	SAR11-IIIa		72.62	5.95	14.29	MAG	_
SFB_9D_13Oct25_20_ms_bin_25	d__Bacteria;p__Pseudomonadota;c__Alphaproteobacteria;o__Pelagibacterales;f__Pelagibacteraceae;g__IMCC9063;s__IMCC9063 sp008638025	SAR11-IIIa		52.38	5.67	61.11	MAG	_
cas-50m-154	d__Bacteria;p__Pseudomonadota;c__Alphaproteobacteria;o__Pelagibacterales;f__Pelagibacteraceae;g__SYDM01;s__SYDM01 sp027625195	SAR11-II	Pelagilacustribacter hypolimneticus	89.16	1.28	0	MAG	_
TMED170	d__Bacteria;p__Pseudomonadota;c__Alphaproteobacteria;o__Pelagibacterales;f__Pelagibacteraceae;g__CACKZT01;s__	SAR11-II		51.52	0	0	MAG	GCA_002170875.2
TMED165	d__Bacteria;p__Pseudomonadota;c__Alphaproteobacteria;o__Pelagibacterales;f__Pelagibacteraceae;g__;s__	SAR11-II		63.05	0	0	MAG	GCA_002171035.2
MED-G40	d__Bacteria;p__Pseudomonadota;c__Alphaproteobacteria;o__Pelagibacterales;f__Pelagibacteraceae;g__MED-G40;s__MED-G40 sp002457515	SAR11-II		89.79	0	0	MAG	GCA_002457515.1
MED727	d__Bacteria;p__Pseudomonadota;c__Alphaproteobacteria;o__Pelagibacterales;f__Pelagibacteraceae;g__MED727;s__MED727 sp002689245	SAR11-II		61.45	1.2	0	MAG	GCA_002689245.1
AG-313-A04	d__Bacteria;p__Pseudomonadota;c__Alphaproteobacteria;o__Pelagibacterales;f__Pelagibacteraceae;g__Pelagibacter_A;s__Pelagibacter_A sp003284275	SAR11-II		91.89	0	0	SAG	GCA_003284275.1
AH-24oct19-262	d__Bacteria;p__Pseudomonadota;c__Alphaproteobacteria;o__Pelagibacterales;f__Pelagibacteraceae;g__SYDM01;s__SYDM01 sp027625195	SAR11-II	Pelagilacustribacter hypolimneticus	90.29	0.6	100	MAG	GCA_945861455.1
TrH-25oct19-165	d__Bacteria;p__Pseudomonadota;c__Alphaproteobacteria;o__Pelagibacterales;f__Pelagibacteraceae;g__SYDM01;s__SYDM01 sp027625195	SAR11-II	Pelagilacustribacter hypolimneticus	93.98	4.82	20	MAG	GCA_965235125
AE-03may19-36	d__Bacteria;p__Pseudomonadota;c__Alphaproteobacteria;o__Pelagibacterales;f__Pelagibacteraceae;g__SYDM01;s__SYDM01 sp027625195	SAR11-II	Pelagilacustribacter hypolimneticus	45.16	0	0	MAG	GCA_965235455
TrE-03may19-55	d__Bacteria;p__Pseudomonadota;c__Alphaproteobacteria;o__Pelagibacterales;f__Pelagibacteraceae;g__SYDM01;s__SYDM01 sp027625195	SAR11-II	Pelagilacustribacter hypolimneticus	67.74	3.01	25	MAG	GCA_965235515
N-Balt4-05jul22-028	d__Bacteria;p__Pseudomonadota;c__Alphaproteobacteria;o__Pelagibacterales;f__Pelagibacteraceae;g__SYDM01;s__SYDM01 sp008638125	SAR11-II		75.9	1.2	100	MAG	GCA_965235895
N-LaRo1-16jan24-084	d__Bacteria;p__Pseudomonadota;c__Alphaproteobacteria;o__Pelagibacterales;f__Pelagibacteraceae;g__SYDM01;s__SYDM01 sp008638125	SAR11-II		71.19	0	0	MAG	GCA_965235935
SCGC_AAA795-E07	d__Bacteria;p__Pseudomonadota;c__Alphaproteobacteria;o__Pelagibacterales;f__Pelagibacteraceae;g__Pelagibacter_A;s__Pelagibacter_A ubique_A	SAR11-II		63.27	0.22	0	SAG	GCF_001179945.1
SFB_3D_13Oct25_05_ms_bin_5	d__Bacteria;p__Pseudomonadota;c__Alphaproteobacteria;o__Pelagibacterales;f__Pelagibacteraceae;g__SYDM01;s__SYDM01 sp008638125	SAR11-II		50.94	7.55	0	MAG	_
cas-150m-16	d__Bacteria;p__Pseudomonadota;c__Alphaproteobacteria;o__Pelagibacterales;f__Pelagibacteraceae;g__Pelagibacter;s__	SAR11-I		60.17	0.95	0	MAG	_
cas-50m-174	d__Bacteria;p__Pseudomonadota;c__Alphaproteobacteria;o__Pelagibacterales;f__Pelagibacteraceae;g__Pelagibacter;s__Pelagibacter sp001438335	SAR11-I		61.86	1.66	0	MAG	_
3300020262_24	d__Bacteria;p__Pseudomonadota;c__Alphaproteobacteria;o__Pelagibacterales;f__Pelagibacteraceae;g__AAA240-E13;s__AAA240-E13 sp002690285	SAR11-I		89.96	0	0	MAG	3300020262_24
3300027685-46	d__Bacteria;p__Pseudomonadota;c__Alphaproteobacteria;o__Pelagibacterales;f__Pelagibacteraceae;g__Pelagibacter;s__Pelagibacter sp002732835	SAR11-I		93.37	2.41	0	MAG	3300027685_46
HIMB5	d__Bacteria;p__Pseudomonadota;c__Alphaproteobacteria;o__Pelagibacterales;f__Pelagibacteraceae;g__Pelagibacter;s__Pelagibacter sp000299095	SAR11-I		100	0.48	0	Culture	GCA_000299095.1
SCGC_AAA795-C09	d__Bacteria;p__Pseudomonadota;c__Alphaproteobacteria;o__Pelagibacterales;f__Pelagibacteraceae;g__Pelagibacter;s__Pelagibacter ubique_N	SAR11-I		53.22	0.47	0	SAG	GCA_001179885.1
SCGC_AAA795-L23	d__Bacteria;p__Pseudomonadota;c__Alphaproteobacteria;o__Pelagibacterales;f__Pelagibacteraceae;g__Pelagibacter;s__Pelagibacter ubique_G	SAR11-I		70.66	0	0	SAG	GCA_001180065.1
GOM-A1	d__Bacteria;p__Pseudomonadota;c__Alphaproteobacteria;o__Pelagibacterales;f__Pelagibacteraceae;g__Pelagibacter;s__Pelagibacter sp001704065	SAR11-I		93.98	1.2	100	SAG	GCA_001704065.1
TMED239	d__Bacteria;p__Pseudomonadota;c__Alphaproteobacteria;o__Pelagibacterales;f__Pelagibacteraceae;g__Pelagibacter;s__	SAR11-I		52.46	0	0	MAG	GCA_002169475.2
MED605	d__Bacteria;p__Pseudomonadota;c__Alphaproteobacteria;o__Pelagibacterales;f__Pelagibacteraceae;g__GCA-2689925;s__GCA-2689925 sp002689925	SAR11-I		91.57	3.61	0	MAG	GCA_002689925.1
Baikal-G1	d__Bacteria;p__Pseudomonadota;c__Alphaproteobacteria;o__Pelagibacterales;f__Pelagibacteraceae;g__Pelagibacter;s__Pelagibacter sp009693705	SAR11-I		90.97	8.77	7.89	MAG	GCA_002737675.1
AG-430-E20	d__Bacteria;p__Pseudomonadota;c__Alphaproteobacteria;o__Pelagibacterales;f__Pelagibacteraceae;g__Pelagibacter;s__Pelagibacter sp003209915	SAR11-I		90.6	0	0	SAG	GCA_003209915.1
AG-426-E17	d__Bacteria;p__Pseudomonadota;c__Alphaproteobacteria;o__Pelagibacterales;f__Pelagibacteraceae;g__Pelagibacter;s__Pelagibacter sp003210095	SAR11-I		100	0.11	0	SAG	GCA_003210095.1
AG-470-G21	d__Bacteria;p__Pseudomonadota;c__Alphaproteobacteria;o__Pelagibacterales;f__Pelagibacteraceae;g__Pelagibacter;s__Pelagibacter sp003211555	SAR11-I		84.34	0	0	SAG	GCA_003211555.1
AG-426-G02	d__Bacteria;p__Pseudomonadota;c__Alphaproteobacteria;o__Pelagibacterales;f__Pelagibacteraceae;g__Pelagibacter;s__Pelagibacter sp003213155	SAR11-I		86.75	0	0	SAG	GCA_003213155.1
MED-G107	d__Bacteria;p__Pseudomonadota;c__Alphaproteobacteria;o__Pelagibacterales;f__Pelagibacteraceae;g__MED-G107;s__MED-G107 sp004213155	SAR11-I		59.89	0	0	MAG	GCA_004213155.1
MED-G108	d__Bacteria;p__Pseudomonadota;c__Alphaproteobacteria;o__Pelagibacterales;f__Pelagibacteraceae;g__AG-414-E02;s__AG-414-E02 sp004213215	SAR11-I		81.05	0	0	MAG	GCA_004213215.1
Baikal-deep-G37	d__Bacteria;p__Pseudomonadota;c__Alphaproteobacteria;o__Pelagibacterales;f__Pelagibacteraceae;g__Pelagibacter;s__Pelagibacter sp009693705	SAR11-I		97.16	0.95	0	MAG	GCA_009693705.1
AG-918-P15	d__Bacteria;p__Pseudomonadota;c__Alphaproteobacteria;o__Pelagibacterales;f__Pelagibacteraceae;g__Pelagibacter;s__Pelagibacter ubique_E	SAR11-I		80.76	0.48	0	MAG	GCA_902614165.1
N-Mw11-20nov23-023	d__Bacteria;p__Pseudomonadota;c__Alphaproteobacteria;o__Pelagibacterales;f__Pelagibacteraceae;g__Pelagibacter;s__Pelagibacter sp016870175	SAR11-I	Pelagibacter malawensis	97.63	0.95	0	MAG	GCA_965235605
N-Mw14-23nov23-016	d__Bacteria;p__Pseudomonadota;c__Alphaproteobacteria;o__Pelagibacterales;f__Pelagibacteraceae;g__Pelagibacter;s__Pelagibacter sp016870175	SAR11-I	Pelagibacter malawensis	97.16	0.49	0	MAG	GCA_965235665
N-SAMO-19jan24-002	d__Bacteria;p__Pseudomonadota;c__Alphaproteobacteria;o__Pelagibacterales;f__Pelagibacteraceae;g__Pelagibacter;s__	SAR11-I		59.51	0	0	MAG	GCA_965235675
N-Mw7-13nov23-016	d__Bacteria;p__Pseudomonadota;c__Alphaproteobacteria;o__Pelagibacterales;f__Pelagibacteraceae;g__Pelagibacter;s__Pelagibacter sp016870175	SAR11-I	Pelagibacter malawensis	99.53	0.95	0	MAG	GCA_965235705
N-Mw9-20nov23-020	d__Bacteria;p__Pseudomonadota;c__Alphaproteobacteria;o__Pelagibacterales;f__Pelagibacteraceae;g__Pelagibacter;s__Pelagibacter sp016870175	SAR11-I	Pelagibacter malawensis	97.2	0.47	0	MAG	GCA_965235865
N-Mw2-16nov23-014	d__Bacteria;p__Pseudomonadota;c__Alphaproteobacteria;o__Pelagibacterales;f__Pelagibacteraceae;g__Pelagibacter;s__Pelagibacter sp016870175	SAR11-I	Pelagibacter malawensis	99.05	0.95	50	MAG	GCA_965235925
N-Mw13-23nov23-053	d__Bacteria;p__Pseudomonadota;c__Alphaproteobacteria;o__Pelagibacterales;f__Pelagibacteraceae;g__Pelagibacter;s__Pelagibacter sp016870175	SAR11-I	Pelagibacter malawensis	99.53	0.47	0	MAG	GCA_965235955
N-Mw15-23nov23-031	d__Bacteria;p__Pseudomonadota;c__Alphaproteobacteria;o__Pelagibacterales;f__Pelagibacteraceae;g__Pelagibacter;s__Pelagibacter sp016870175	SAR11-I	Pelagibacter malawensis	98.58	1.42	0	MAG	GCA_965235985
N-Mw5-13nov23-008	d__Bacteria;p__Pseudomonadota;c__Alphaproteobacteria;o__Pelagibacterales;f__Pelagibacteraceae;g__Pelagibacter;s__Pelagibacter sp016870175	SAR11-I	Pelagibacter malawensis	99.05	0.47	0	MAG	GCA_965235995
N-Mw10-20nov23-014	d__Bacteria;p__Pseudomonadota;c__Alphaproteobacteria;o__Pelagibacterales;f__Pelagibacteraceae;g__Pelagibacter;s__Pelagibacter sp016870175	SAR11-I	Pelagibacter malawensis	99.05	0.47	0	MAG	GCA_965236025
N-Mw8-13nov23-009	d__Bacteria;p__Pseudomonadota;c__Alphaproteobacteria;o__Pelagibacterales;f__Pelagibacteraceae;g__Pelagibacter;s__Pelagibacter sp016870175	SAR11-I	Pelagibacter malawensis	93.03	0	0	MAG	GCA_965236055
N-Mw6-13nov23-020	d__Bacteria;p__Pseudomonadota;c__Alphaproteobacteria;o__Pelagibacterales;f__Pelagibacteraceae;g__Pelagibacter;s__Pelagibacter sp016870175	SAR11-I	Pelagibacter malawensis	99.05	0.95	0	MAG	GCA_965236085
N-LaCa2-17jan24-061	d__Bacteria;p__Pseudomonadota;c__Alphaproteobacteria;o__Pelagibacterales;f__Pelagibacteraceae;g__Pelagibacter;s__	SAR11-I		82.57	4.03	70	MAG	GCA_965236125
N-Mw1-16nov23-027	d__Bacteria;p__Pseudomonadota;c__Alphaproteobacteria;o__Pelagibacterales;f__Pelagibacteraceae;g__Pelagibacter;s__Pelagibacter sp016870175	SAR11-I	Pelagibacter malawensis	99.05	0.71	0	MAG	GCA_965244645
HTCC1062	d__Bacteria;p__Pseudomonadota;c__Alphaproteobacteria;o__Pelagibacterales;f__Pelagibacteraceae;g__Pelagibacter;s__Pelagibacter ubique	SAR11-I		100	0.47	0	Culture	GCF_000012345.1
HTCC1002	d__Bacteria;p__Pseudomonadota;c__Alphaproteobacteria;o__Pelagibacterales;f__Pelagibacteraceae;g__Pelagibacter;s__Pelagibacter ubique	SAR11-I		100	0.47	0	Culture	GCF_000153525.1
HTCC7211	d__Bacteria;p__Pseudomonadota;c__Alphaproteobacteria;o__Pelagibacterales;f__Pelagibacteraceae;g__Pelagibacter;s__Pelagibacter sp000155895	SAR11-I		100	0.47	0	Culture	GCF_000155895.1
HTCC1040	d__Bacteria;p__Pseudomonadota;c__Alphaproteobacteria;o__Pelagibacterales;f__Pelagibacteraceae;g__Pelagibacter;s__Pelagibacter ubique	SAR11-I		100	0.47	0	Culture	GCF_000384455.1
HTCC9022	d__Bacteria;p__Pseudomonadota;c__Alphaproteobacteria;o__Pelagibacterales;f__Pelagibacteraceae;g__Pelagibacter;s__	SAR11-I		100	0	0	Culture	GCF_000472565.1
HTCC1013	d__Bacteria;p__Pseudomonadota;c__Alphaproteobacteria;o__Pelagibacterales;f__Pelagibacteraceae;g__Pelagibacter;s__Pelagibacter ubique	SAR11-I		100	0.47	0	Culture	GCF_000472585.1
HTCC8051	d__Bacteria;p__Pseudomonadota;c__Alphaproteobacteria;o__Pelagibacterales;f__Pelagibacteraceae;g__Pelagibacter;s__	SAR11-I		99.76	0	0	Culture	GCF_000472605.1
HIMB083	d__Bacteria;p__Pseudomonadota;c__Alphaproteobacteria;o__Pelagibacterales;f__Pelagibacteraceae;g__Pelagibacter;s__Pelagibacter ubique_Q	SAR11-I		99.53	0	0	SAG	GCF_000504225.1
HTCC7214	d__Bacteria;p__Pseudomonadota;c__Alphaproteobacteria;o__Pelagibacterales;f__Pelagibacteraceae;g__Pelagibacter;s__	SAR11-I		99.05	0.47	0	Culture	GCF_000701385.1
SCGC_AAA795-A20	d__Bacteria;p__Pseudomonadota;c__Alphaproteobacteria;o__Pelagibacterales;f__Pelagibacteraceae;g__Pelagibacter;s__Pelagibacter ubique_Q	SAR11-I		86.82	0	0	SAG	GCF_001179845.1
SCGC_AAA795-D22	d__Bacteria;p__Pseudomonadota;c__Alphaproteobacteria;o__Pelagibacterales;f__Pelagibacteraceae;g__Pelagibacter;s__Pelagibacter sp902587665	SAR11-I		68.88	2.14	0	SAG	GCF_001179925.1
SCGC_AAA795-F16	d__Bacteria;p__Pseudomonadota;c__Alphaproteobacteria;o__Pelagibacterales;f__Pelagibacteraceae;g__Pelagibacter;s__Pelagibacter ubique_J	SAR11-I		75.5	0	0	SAG	GCF_001179985.1
SCGC_AAA795-J21	d__Bacteria;p__Pseudomonadota;c__Alphaproteobacteria;o__Pelagibacterales;f__Pelagibacteraceae;g__Pelagibacter;s__Pelagibacter ubique_A	SAR11-I		60.51	0	0	SAG	GCF_001180025.1
SCGC_AAA795-M18	d__Bacteria;p__Pseudomonadota;c__Alphaproteobacteria;o__Pelagibacterales;f__Pelagibacteraceae;g__Pelagibacter;s__Pelagibacter sp002101295	SAR11-I		58.84	0.6	100	SAG	GCF_001180085.1
SCGC_AAA795-M22	d__Bacteria;p__Pseudomonadota;c__Alphaproteobacteria;o__Pelagibacterales;f__Pelagibacteraceae;g__Pelagibacter;s__Pelagibacter ubique_K	SAR11-I		81.93	1.31	50	SAG	GCF_001180105.1
SCGC_AAA795-O19	d__Bacteria;p__Pseudomonadota;c__Alphaproteobacteria;o__Pelagibacterales;f__Pelagibacteraceae;g__Pelagibacter;s__Pelagibacter ubique_P	SAR11-I		51.44	0	0	SAG	GCF_001180165.1
SCGC_AAA795-O20	d__Bacteria;p__Pseudomonadota;c__Alphaproteobacteria;o__Pelagibacterales;f__Pelagibacteraceae;g__Pelagibacter;s__Pelagibacter ubique_F	SAR11-I		78.7	0	0	SAG	GCF_001180185.1
SCGC_AAA795-P11	d__Bacteria;p__Pseudomonadota;c__Alphaproteobacteria;o__Pelagibacterales;f__Pelagibacteraceae;g__Pelagibacter;s__Pelagibacter ubique_O	SAR11-I		73.09	1.2	8.33	SAG	GCF_001180205.1
SCGC_AAA797-I19	d__Bacteria;p__Pseudomonadota;c__Alphaproteobacteria;o__Pelagibacterales;f__Pelagibacteraceae;g__Pelagibacter;s__Pelagibacter ubique_D	SAR11-I		67.04	0.47	100	SAG	GCF_001180225.1
RS40	d__Bacteria;p__Pseudomonadota;c__Alphaproteobacteria;o__Pelagibacterales;f__Pelagibacteraceae;g__Pelagibacter;s__Pelagibacter sp002101295	SAR11-I		100	0	0	Culture	GCF_002101295.1
RS39	d__Bacteria;p__Pseudomonadota;c__Alphaproteobacteria;o__Pelagibacterales;f__Pelagibacteraceae;g__Pelagibacter;s__Pelagibacter sp002101315	SAR11-I		100	0	0	Culture	GCF_002101315.1
P.Giovannonii	d__Bacteria;p__Pseudomonadota;c__Alphaproteobacteria;o__Pelagibacterales;f__Pelagibacteraceae;g__Pelagibacter;s__Pelagibacter giovannonii	SAR11-I		99.05	0.63	0	Culture	GCF_012276695.1
HTCC9565	d__Bacteria;p__Pseudomonadota;c__Alphaproteobacteria;o__Pelagibacterales;f__Pelagibacteraceae;g__Pelagibacter;s__Pelagibacter ubique_S	SAR11-I		99.05	0	0	Culture	GCF_012932795.1
BACL5 MAG-120820-bin39	d__Bacteria;p__Pseudomonadota;c__Alphaproteobacteria;o__Pelagibacterales;f__Pelagibacteraceae;g__Pelagibacter;s__Pelagibacter sp001438335	SAR11-I		95.32	4.27	66.67	MAG	GCA_001438335.1
MED-G106	d__Bacteria;p__Pseudomonadota;c__Alphaproteobacteria;o__Pelagibacterales;f__Pelagibacteraceae;g__Pelagibacter;s__Pelagibacter sp014654065	SAR11-I		43.98	0	0	MAG	GCA_004213595.1
SFB_27D_13Oct24_20_ms_bin_12	d__Bacteria;p__Pseudomonadota;c__Alphaproteobacteria;o__Pelagibacterales;f__Pelagibacteraceae;g__Pelagibacter;s__Pelagibacter sp008638165	SAR11-I		60	4.29	30.77	MAG	GCA_025994985.1
SFB_27D_13Oct24_20_ms_bin_5	d__Bacteria;p__Pseudomonadota;c__Alphaproteobacteria;o__Pelagibacterales;f__Pelagibacteraceae;g__Pelagibacter;s__Pelagibacter ubique	SAR11-I		85.69	2.37	16.67	MAG	GCA_025994995.1
SFB_34D_13Oct24_05_ms_bin_2	d__Bacteria;p__Pseudomonadota;c__Alphaproteobacteria;o__Pelagibacterales;f__Pelagibacteraceae;g__Pelagibacter;s__Pelagibacter sp008638165	SAR11-I		72.22	0.2	0	MAG	GCA_025994975.1
SFB_34D_13Oct24_05_ms_bin_3	d__Bacteria;p__Pseudomonadota;c__Alphaproteobacteria;o__Pelagibacterales;f__Pelagibacteraceae;g__Pelagibacter;s__Pelagibacter sp028229795	SAR11-I		62.19	1.9	25	MAG	GCA_025995025.1
SFB_34D_13Oct24_10_ms_bin_10	d__Bacteria;p__Pseudomonadota;c__Alphaproteobacteria;o__Pelagibacterales;f__Pelagibacteraceae;g__Pelagibacter;s__Pelagibacter sp028229795	SAR11-I		56.66	5.45	41.67	MAG	GCA_025994935.1
GOM-A5	d__Bacteria;p__Pseudomonadota;c__Alphaproteobacteria;o__Pelagibacterales;f__Pelagibacteraceae;g__Pelagibacter;s__Pelagibacter sp001704055	SAR11-I		52.42	0.07	100	SAG	GCA_001704055.1
PRT-SC02	d__Bacteria;p__Pseudomonadota;c__Alphaproteobacteria;o__Pelagibacterales;f__Pelagibacteraceae;g__PRT-SC02;s__PRT-SC02 sp001321855	not included in tree		66.76	0.14	50	SAG	GCA_001321855.1
TrE-03may19-240	d__Bacteria;p__Pseudomonadota;c__Alphaproteobacteria;o__Pelagibacterales;f__Pelagibacteraceae;g__Fonsibacter;s__Fonsibacter sp947497305	not included in tree		40.53	0	0	MAG	GCA_965235185
AH-03may19-33	d__Bacteria;p__Pseudomonadota;c__Alphaproteobacteria;o__Pelagibacterales;f__Pelagibacteraceae;g__Fonsibacter;s__Fonsibacter sp000510845	not included in tree		49.06	4.22	75	MAG	GCA_965235225
MsE-30jul19-LR-129	d__Bacteria;p__Pseudomonadota;c__Alphaproteobacteria;o__Pelagibacterales;f__Pelagibacteraceae;g__Fonsibacter;s__Fonsibacter sp018882565	not included in tree		40.53	0	0	MAG	GCA_965235235
ZH-03apr19-302	d__Bacteria;p__Pseudomonadota;c__Alphaproteobacteria;o__Pelagibacterales;f__Pelagibacteraceae;g__Fonsibacter;s__Fonsibacter sp947497305	not included in tree		46.28	0.22	100	MAG	GCA_965235345
LH-02apr19-190	d__Bacteria;p__Pseudomonadota;c__Alphaproteobacteria;o__Pelagibacterales;f__Pelagibacteraceae;g__Fonsibacter;s__Fonsibacter ubiquis	not included in tree		47.36	1.2	100	MAG	GCA_965235355
MsH-30apr19-91	d__Bacteria;p__Pseudomonadota;c__Alphaproteobacteria;o__Pelagibacterales;f__Pelagibacteraceae;g__Fonsibacter;s__Fonsibacter sp947497305	not included in tree		41.56	1.2	100	MAG	GCA_965235365
MsH-30jul19-35	d__Bacteria;p__Pseudomonadota;c__Alphaproteobacteria;o__Pelagibacterales;f__Pelagibacteraceae;g__Fonsibacter;s__Fonsibacter sp000510845	not included in tree		56.95	2.41	100	MAG	GCA_965235425
ZE-13nov19-106	d__Bacteria;p__Pseudomonadota;c__Alphaproteobacteria;o__Pelagibacterales;f__Pelagibacteraceae;g__Fonsibacter;s__Fonsibacter sp947497305	not included in tree		45.24	0	0	MAG	GCA_965235435
ZH-13nov19-89	d__Bacteria;p__Pseudomonadota;c__Alphaproteobacteria;o__Pelagibacterales;f__Pelagibacteraceae;g__Fonsibacter;s__Fonsibacter sp947497305	not included in tree		50.72	1.2	100	MAG	GCA_965235445
LE-02apr19-277	d__Bacteria;p__Pseudomonadota;c__Alphaproteobacteria;o__Pelagibacterales;f__Pelagibacteraceae;g__Fonsibacter;s__Fonsibacter ubiquis	not included in tree		40.74	2.41	50	MAG	GCA_965235475
MsH-01oct19-285	d__Bacteria;p__Pseudomonadota;c__Alphaproteobacteria;o__Pelagibacterales;f__Pelagibacteraceae;g__Fonsibacter;s__Fonsibacter sp000510845	not included in tree		45.78	3.01	100	MAG	GCA_965235485
MiH-22jul19-202	d__Bacteria;p__Pseudomonadota;c__Alphaproteobacteria;o__Pelagibacterales;f__Pelagibacteraceae;g__Fonsibacter;s__Fonsibacter sp018882565	not included in tree		43.68	1.2	0	MAG	GCA_965235525
MiH-16apr19-192	d__Bacteria;p__Pseudomonadota;c__Alphaproteobacteria;o__Pelagibacterales;f__Pelagibacteraceae;g__Fonsibacter;s__Fonsibacter sp018882565	not included in tree		46.28	2.74	100	MAG	GCA_965235555
N-Mw9-20nov23-034	d__Bacteria;p__Pseudomonadota;c__Alphaproteobacteria;o__Pelagibacterales;f__Pelagibacteraceae;g__Fonsibacter;s__Fonsibacter sp016882185	not included in tree		92.1	0.6	100	MAG	GCA_965236155
N-LaRo2-16jan24-C98	d__Bacteria;p__Pseudomonadota;c__Alphaproteobacteria;o__Pelagibacterales;f__Pelagibacteraceae;g__IMCC9063;s__IMCC9063 sp008638015	not included in tree		53.7	0	0	MAG	GCA_965243925
N-BiH-22sep22-C130	d__Bacteria;p__Pseudomonadota;c__Alphaproteobacteria;o__Pelagibacterales;f__Pelagibacteraceae;g__Fonsibacter;s__Fonsibacter ubiquis	not included in tree		52.83	0	0	MAG	GCA_965244555
N-LaBr-23jan24-C92	d__Bacteria;p__Pseudomonadota;c__Alphaproteobacteria;o__Pelagibacterales;f__Pelagibacteraceae;g__Fonsibacter;s__Fonsibacter ubiquis	not included in tree		72.29	0	0	MAG	GCA_965244565
Ki3-D3_bin-0374	d__Bacteria;p__Pseudomonadota;c__Alphaproteobacteria;o__Pelagibacterales;f__Pelagibacteraceae;g__Fonsibacter;s__	not included in tree		59.31	2.06	100	MAG	GCA_903910945.1
Ki3-D4_bin-399	d__Bacteria;p__Pseudomonadota;c__Alphaproteobacteria;o__Pelagibacterales;f__Pelagibacteraceae;g__Fonsibacter;s__	not included in tree		46.31	1.2	100	MAG	GCA_903883625.1
Loc081215-1m_bin-2385	d__Bacteria;p__Pseudomonadota;c__Alphaproteobacteria;o__Pelagibacterales;f__Pelagibacteraceae;g__Fonsibacter;s__	not included in tree		53.99	2.92	71.43	MAG	GCA_903937425.1
WB4_1_0024	d__Bacteria;p__Pseudomonadota;c__Alphaproteobacteria;o__Pelagibacterales;f__Pelagibacteraceae;g__Fonsibacter;s__Fonsibacter lacus	not included in tree		53.64	1.2	100	MAG	GCA_009924625.1
WBB_5_011	d__Bacteria;p__Pseudomonadota;c__Alphaproteobacteria;o__Pelagibacterales;f__Pelagibacteraceae;g__Fonsibacter;s__Fonsibacter lacus	not included in tree		57.81	0	0	MAG	GCA_010030775.1
Ja2-D2_bin-0430	d__Bacteria;p__Pseudomonadota;c__Alphaproteobacteria;o__Pelagibacterales;f__Pelagibacteraceae;g__Fonsibacter;s__Fonsibacter sp000371845	not included in tree		40.73	2.34	83.33	MAG	GCA_903827125.1
Ja2-D2_bin-0948	d__Bacteria;p__Pseudomonadota;c__Alphaproteobacteria;o__Pelagibacterales;f__Pelagibacteraceae;g__Fonsibacter;s__Fonsibacter sp000371845	not included in tree		40.84	0.27	50	MAG	GCA_903820675.1
LJ-3-65m_bin-1118	d__Bacteria;p__Pseudomonadota;c__Alphaproteobacteria;o__Pelagibacterales;f__Pelagibacteraceae;g__Fonsibacter;s__Fonsibacter sp000371845	not included in tree		53.79	1.2	0	MAG	GCA_903903545.1
Erken-D10_bin-0330	d__Bacteria;p__Pseudomonadota;c__Alphaproteobacteria;o__Pelagibacterales;f__Pelagibacteraceae;g__Fonsibacter;s__Fonsibacter sp000419465	not included in tree		46.26	3.08	100	MAG	GCA_903903595.1
Loc080925-4m_bin-0302	d__Bacteria;p__Pseudomonadota;c__Alphaproteobacteria;o__Pelagibacterales;f__Pelagibacteraceae;g__Fonsibacter;s__Fonsibacter sp000419465	not included in tree		49.72	4.48	81.82	MAG	GCA_903958895.1
Loc080925-5m_bin-0965	d__Bacteria;p__Pseudomonadota;c__Alphaproteobacteria;o__Pelagibacterales;f__Pelagibacteraceae;g__Fonsibacter;s__Fonsibacter sp000419465	not included in tree		47.4	4.14	100	MAG	GCA_903959705.1
Loc080925-8m_bin-308	d__Bacteria;p__Pseudomonadota;c__Alphaproteobacteria;o__Pelagibacterales;f__Pelagibacteraceae;g__Fonsibacter;s__Fonsibacter sp000419465	not included in tree		57.09	2.63	75	MAG	GCA_903945655.1
Loc081215-4m_bin-2226	d__Bacteria;p__Pseudomonadota;c__Alphaproteobacteria;o__Pelagibacterales;f__Pelagibacteraceae;g__Fonsibacter;s__Fonsibacter sp000419465	not included in tree		42.19	0.11	0	MAG	GCA_903933785.1
Loc081215-5m_bin-2027	d__Bacteria;p__Pseudomonadota;c__Alphaproteobacteria;o__Pelagibacterales;f__Pelagibacteraceae;g__Fonsibacter;s__Fonsibacter sp000419465	not included in tree		48.82	4.95	100	MAG	GCA_903938185.1
Loc081215-8m_bin-2834	d__Bacteria;p__Pseudomonadota;c__Alphaproteobacteria;o__Pelagibacterales;f__Pelagibacteraceae;g__Fonsibacter;s__Fonsibacter sp000419465	not included in tree		55.27	1.31	0	MAG	GCA_903934575.1
Loc081215-9m_bin-1587	d__Bacteria;p__Pseudomonadota;c__Alphaproteobacteria;o__Pelagibacterales;f__Pelagibacteraceae;g__Fonsibacter;s__Fonsibacter sp000419465	not included in tree		60.84	1.81	100	MAG	GCA_903952855.1
Loc090116-8m_bin-0622	d__Bacteria;p__Pseudomonadota;c__Alphaproteobacteria;o__Pelagibacterales;f__Pelagibacteraceae;g__Fonsibacter;s__Fonsibacter sp000419465	not included in tree		45.64	2.06	100	MAG	GCA_903953355.1
Loc090116-9m_bin-1005	d__Bacteria;p__Pseudomonadota;c__Alphaproteobacteria;o__Pelagibacterales;f__Pelagibacteraceae;g__Fonsibacter;s__Fonsibacter sp000419465	not included in tree		48.24	0.36	75	MAG	GCA_903960925.1
UppL5_bin-1430	d__Bacteria;p__Pseudomonadota;c__Alphaproteobacteria;o__Pelagibacterales;f__Pelagibacteraceae;g__Fonsibacter;s__Fonsibacter sp000419465	not included in tree		57.7	0.29	100	MAG	GCA_903874985.1
Erken-D11_bin-0424	d__Bacteria;p__Pseudomonadota;c__Alphaproteobacteria;o__Pelagibacterales;f__Pelagibacteraceae;g__Fonsibacter;s__Fonsibacter sp000510845	not included in tree		44.49	2.41	100	MAG	GCA_903829575.1
Erken-D9_bin-0756	d__Bacteria;p__Pseudomonadota;c__Alphaproteobacteria;o__Pelagibacterales;f__Pelagibacteraceae;g__Fonsibacter;s__Fonsibacter sp000510845	not included in tree		59.19	4	83.33	MAG	GCA_903822735.1
Kiruna3_bin-2261	d__Bacteria;p__Pseudomonadota;c__Alphaproteobacteria;o__Pelagibacterales;f__Pelagibacteraceae;g__Fonsibacter;s__Fonsibacter sp040404065	not included in tree		48.36	2.41	0	MAG	GCA_903925115.1
Kiruna_bin-12800	d__Bacteria;p__Pseudomonadota;c__Alphaproteobacteria;o__Pelagibacterales;f__Pelagibacteraceae;g__Fonsibacter;s__Fonsibacter sp040404065	not included in tree		52.49	2.41	50	MAG	GCA_903871625.1
LaPlata-a_bin-0556	d__Bacteria;p__Pseudomonadota;c__Alphaproteobacteria;o__Pelagibacterales;f__Pelagibacteraceae;g__Fonsibacter;s__Fonsibacter ubiquis	not included in tree		54.62	2.63	50	MAG	GCA_903835215.1
LaPlata-b_bin-1916	d__Bacteria;p__Pseudomonadota;c__Alphaproteobacteria;o__Pelagibacterales;f__Pelagibacteraceae;g__Fonsibacter;s__Fonsibacter ubiquis	not included in tree		52.14	2.13	83.33	MAG	GCA_903893655.1
LaPlata_bin-0890	d__Bacteria;p__Pseudomonadota;c__Alphaproteobacteria;o__Pelagibacterales;f__Pelagibacteraceae;g__Fonsibacter;s__Fonsibacter ubiquis	not included in tree		49.26	2.06	100	MAG	GCA_903923825.1
TMED275	d__Bacteria;p__Pseudomonadota;c__Alphaproteobacteria;o__Pelagibacterales;f__Pelagibacteraceae;g__Pelagibacter;s__	not included in tree		50.49	0.11	100	MAG	GCA_002169255.1

## Sheet: S3_Metagenomes
Supplementary Data 3: Details on metagenomes used in this study.
Metagenome ID	SRA/ENA accession number	Lake	Depth (m)
ATTRE-SM-16jul20	ERR3719149	Attersee	5
ATTRE-SM-26apr22	ERR5863100	Attersee	5
ATTRH-SM-16jul20	ERR3719150	Attersee	150
ATTRH-SM-26apr22	ERR5863101	Attersee	150
BiE-22sep22	ERR14789926	Biwa	5
BiH-22sep22	ERR14789927	Biwa	50
LBG-augE-5m-2016	DRX117924	Biwa	5
LBG-julE-5m-2016	DRX117925	Biwa	5
LBG-sepE-5m-2016	DRX117927	Biwa	5
CE-Jul18	ERR3997373	Constance	5
CE-Oct18	ERR3997374	Constance	5
CH-Jul18	ERR3997375	Constance	200
CH-Oct18	ERR3997376	Constance	200
Erie_SRR5273323	SRR5273323	Erie	0
Erie_SRR5273325	SRR5273325	Erie	0
Erken-D7-ERR4193667	ERR4193667	Erken	14
Erken-D8-ERR4195032	ERR4195032	Erken	16
Erken-D9-ERR4210440	ERR4210440	Erken	18
Erken-UppL3-ERR4194707	ERR4194707	Erken	20
GE-07nov19	ERR5863102	Greifensee	5
GH-07nov19	ERR5863103	Greifensee	15
Huron_SRR5260286	SRR5260286	Huron	0
Huron_SRR5260362	SRR5260362	Huron	0
Huron_SRR5260390	SRR5260390	Huron	0
Huron_SRR5260432	SRR5260432	Huron	0
Huron_SRR5260446	SRR5260446	Huron	0
Huron_SRR5260447	SRR5260447	Huron	0
Huron_SRR5260448	SRR5260448	Huron	0
Huron_SRR5260494	SRR5260494	Huron	0
Huron_SRR5260495	SRR5260495	Huron	0
Huron_SRR5260496	SRR5260496	Huron	0
Huron_SRR5260497	SRR5260497	Huron	0
Huron_SRR5273324	SRR5273324	Huron	0
KE-07aug19	ERR12084949	Klicava	0.5
KE-08aug18	ERR12084943	Klicava	0.5
KE-20nov19	ERR12084951	Klicava	0.5
KE-21nov18	ERR12084945	Klicava	0.5
KE-25apr19	ERR12084947	Klicava	0.5
KH-07aug19	ERR12084950	Klicava	25
KH-20nov19	ERR12084952	Klicava	25
KH-21nov18	ERR12084946	Klicava	25
KH-25apr19	ERR12084948	Klicava	25
Maggiore-5m	ERR5863127	Maggiore	5
MaE-04nov19	ERR5863106	Maggiore	5
Maggiore-300m	ERR5863129	Maggiore	300
MaH-04nov19	ERR5863107	Maggiore	300
Mw10-20nov23	ERR14789950	Malawi	50
Mw1-16nov23	ERR14789943	Malawi	5
Mw13-23nov23	ERR14789952	Malawi	5
Mw14-23nov23	ERR14789953	Malawi	50
Mw15-23nov23	ERR14789954	Malawi	100
Mw2-16nov23	ERR14789944	Malawi	50
Mw5-13nov23	ERR14789945	Malawi	5
Mw6-13nov23	ERR14789946	Malawi	50
Mw9-20nov23	ERR14789949	Malawi	5
ME-08apr19	ERR3719153	Medard	5
ME-09jul19	ERR3719159	Medard	5
ME-21oct19	ERR5863108	Medard	5
MH-08apr19	ERR3719154	Medard	40
MH-09jul19	ERR3719160	Medard	40
MH-21oct19	ERR5863109	Medard	40
MiE-14oct19	ERR5863110	Milada	5
MiE-16apr19	ERR3719155	Milada	5
MiE-22jul19	ERR3719161	Milada	5
MiH-14oct19	ERR5863111	Milada	15
MiH-22jul19	ERR3719165	Milada	15
MoE-02may19	ERR3719147	Mondsee	5
MoE-23oct19	ERR5863112	Mondsee	5
Montoje-130807-EF-SRR5818198	SRR5818198	Montoje	3
Montoje-140807-MF-SRR5818197	SRR5818197	Montoje	7
MsE-01oct19	ERR5863114	Most	5
MsE-30apr19	ERR3719157	Most	5
MsE-30jul19	ERR3719163	Most	5
MsH-01oct19	ERR5863115	Most	50
MsH-30apr19	ERR3719158	Most	50
MsH-30jul19	ERR3719164	Most	50
SimonC-130805-EF-SRR5818195	SRR5818195	Simoncouche	2
SimonC-130805-MF-SRR5818245	SRR5818245	Simoncouche	5
SimonC-140806-EF-SRR5818246	SRR5818246	Simoncouche	2
SimonC-140806-MF-SRR5818243	SRR5818243	Simoncouche	5
TNGK-Kigoma-12-surface-SRR7990527	SRR7990527	Tanganyika	0
TNGK-Kigoma-Deep-Cast-0m-SRR7053051	SRR7053051	Tanganyika	0
TNGK-Kigoma-Deep-Cast-100m-SRR7990334	SRR7990334	Tanganyika	100
TNGK-Kigoma-Deep-Cast-1200m-SRR7008010	SRR7008010	Tanganyika	1200
TNGK-Kigoma-Deep-Cast-150m-SRR7052952	SRR7052952	Tanganyika	150
TNGK-Kigoma-Deep-Cast-250m-SRR7989281	SRR7989281	Tanganyika	250
TNGK-Kigoma-Deep-Cast-300m-SRR7979708	SRR7979708	Tanganyika	300
TNGK-Kigoma-Deep-Cast-35m-SRR7053298	SRR7053298	Tanganyika	35
TNGK-Kigoma-Offshore-0m-SRR7990717	SRR7990717	Tanganyika	0
TNGK-Kigoma-Offshore-40m-SRR7990546	SRR7990546	Tanganyika	40
TNGK-Mahale-A-surface-SRR7988745	SRR7988745	Tanganyika	0
TNGK-Mahale-Deep-Cast-100m-SRR7053050	SRR7053050	Tanganyika	100
TNGK-Mahale-Deep-Cast-10m-SRR7985618	SRR7985618	Tanganyika	10
TNGK-Mahale-Deep-Cast-200m-SRR7008372	SRR7008372	Tanganyika	200
TNGK-Mahale-Deep-Cast-400m-SRR7979709	SRR7979709	Tanganyika	400
TNGK-Mahale-Deep-Cast-50m-SRR7052762	SRR7052762	Tanganyika	50
TNGK-Mahale-N1-surface-SRR7985596	SRR7985596	Tanganyika	0
TNGK-Mahale-N5-surface-SRR7985617	SRR7985617	Tanganyika	0
TNGK-Mahale-S4-surface-SRR7985395	SRR7985395	Tanganyika	0
TNGK-Mahale-S9-surface-SRR7052951	SRR7052951	Tanganyika	0
BRZL-Tite-SRR19581707	SRR19581707	Tiete	0
BRZL-Tite-SRR19581708	SRR19581708	Tiete	0
BRZL-Tite-SRR19581709	SRR19581709	Tiete	0
TRAUE-SM-17jul20	ERR3719151	Traunsee	5
TRAUE-SM-29apr22	ERR5863118	Traunsee	5
TRAUH-SM-17jul20	ERR3719152	Traunsee	150
TRAUH-SM-29apr22	ERR5863119	Traunsee	150
ZLE-06aug19	ERR12084965	Zlutice	5
ZLE-19nov19	ERR12084967	Zlutice	5
ZE_Jul18	ERR5863204	Zurich	5
ZE_Oct18	ERR3997377	Zurich	5
ZE-13may13	SRS2837655	Zurich	5
ZE-13nov19	ERR5863121	Zurich	5
ZE-13oct10	SRS2837653	Zurich	5
ZE-17mar17	SRS2837656	Zurich	2
ZH-13may13	SRS2837654	Zurich	80
Zurich-5m	ERR14787633	Zurich	5

## Sheet: S4_InStrain_Genome_Metrics
Supplementary Data 4: InStrain genome-wide metric output for each of the three Fontibacterium species.
Metagenome ID	Lake	Depth (m)	Reference genome	Reference genome taxonomy	Genome size (bp)	Coverage	Breadth	Nucleotide diversity	Coverage_median	Coverage_std	Coverage_SEM	Breadth_minCov	Breadth_expected	Nucleotide diversity rarefied	conANI reference	popANI reference	SNS count	SNV count	Divergent site count	Population divergent sites	Consensus divergent sites
Mw10-20nov23	Malawi	50	N-Mw6-13nov23-081	F. africanum	1027849	148.195	0.976857	0.0337897	138	90.5106	0.089337	0.970569	1	0.0333511	0.995962	0.999799	163	113742	113905	201	4028
Mw1-16nov23	Malawi	5	N-Mw6-13nov23-081	F. africanum	1027849	809.095	0.987396	0.034556	817	370.683	0.365877	0.980328	1	0.034149	0.996341	0.999769	197	104400	6874096	233	3687
Mw13-23nov23	Malawi	5	N-Mw6-13nov23-081	F. africanum	1027849	981.82	0.986792	0.0331087	972	454.806	0.448908	0.979366	1	0.0326782	0.996295	0.999772	193	93491	93684	230	3730
Mw14-23nov23	Malawi	50	N-Mw6-13nov23-081	F. africanum	1027849	501.044	0.981611	0.0339385	514	208.137	0.205438	0.976403	1	0.0333991	0.996203	0.999786	185	101348	4083102	215	3811
Mw15-23nov23	Malawi	100	N-Mw6-13nov23-081	F. africanum	1027849	619.019	0.985637	0.0331176	659	238.292	0.235202	0.977132	1	0.0325891	0.99615	0.999789	175	93725	93900	212	3867
Mw2-16nov23	Malawi	50	N-Mw6-13nov23-081	F. africanum	1027849	894.362	0.987929	0.0339367	848	477.565	0.471372	0.981119	1	0.0335998	0.996499	0.999775	194	98619	8657156	227	3531
Mw5-13nov23	Malawi	5	N-Mw6-13nov23-081	F. africanum	1027849	2166.7	0.990852	0.0333038	2146	1049.07	1.03546	0.984477	1	0.0329189	0.9964	0.999733	230	93794	94024	270	3643
Mw6-13nov23	Malawi	50	N-Mw6-13nov23-081	F. africanum	1027849	505.127	0.981875	0.0346751	497	255.359	0.252048	0.977042	1	0.0342694	0.996514	0.999809	157	106877	107034	192	3501
Mw7-13nov23	Malawi	100	N-Mw6-13nov23-081	F. africanum	1027849	183.07	0.979493	0.0326258	189	74.6184	0.0736508	0.971254	1	0.0321687	0.995829	0.999818	150	97894	98044	182	4164
Mw9-20nov23	Malawi	5	N-Mw6-13nov23-081	F. africanum	1027849	220.116	0.982102	0.0329687	219	114.963	0.113473	0.973225	1	0.032612	0.996038	0.999781	184	98139	98323	219	3963
TNGK-Kigoma-12-surface-SRR7990527	Tanganyika	0	N-Mw6-13nov23-081	F. africanum	1027849	1466.8	0.979157	0.0268001	1648	607.169	0.599296	0.976995	1	0.0262427	0.987662	0.999594	352	75737	13051694	408	12390
TNGK-Kigoma-Deep-Cast-0m-SRR7053051	Tanganyika	0	N-Mw6-13nov23-081	F. africanum	1027849	1416.96	0.98012	0.0279481	1560	568.25	0.560881	0.976797	1	0.0274001	0.989274	0.99965	301	78406	78707	351	10769
TNGK-Kigoma-Deep-Cast-100m-SRR7990334	Tanganyika	100	N-Mw6-13nov23-081	F. africanum	1027849	568.434	0.9791	0.0279359	620	229.992	0.22701	0.974256	1	0.0272859	0.98935	0.999666	286	79723	5176088	334	10665
TNGK-Kigoma-Deep-Cast-1200m-SRR7008010	Tanganyika	1200	N-Mw6-13nov23-081	F. africanum	1027849	316.053	0.978226	0.0279117	346	128.214	0.126552	0.972354	1	0.0272794	0.989001	0.999666	289	82842	83131	334	10993
TNGK-Kigoma-Deep-Cast-150m-SRR7052952	Tanganyika	150	N-Mw6-13nov23-081	F. africanum	1027849	334.586	0.978765	0.0283037	366	133.349	0.13162	0.97292	1	0.0276901	0.989333	0.999655	301	83533	83834	345	10667
TNGK-Kigoma-Deep-Cast-250m-SRR7989281	Tanganyika	250	N-Mw6-13nov23-081	F. africanum	1027849	365.747	0.978634	0.028094	400	148.124	0.146204	0.973005	1	0.0275214	0.989099	0.99967	284	82693	3321786	330	10902
TNGK-Kigoma-Deep-Cast-300m-SRR7979708	Tanganyika	300	N-Mw6-13nov23-081	F. africanum	1027849	228.654	0.97686	0.0275716	250	93.8703	0.092653	0.970887	1	0.0269045	0.988928	0.999657	297	82896	2410892	342	11049
TNGK-Kigoma-Deep-Cast-35m-SRR7053298	Tanganyika	35	N-Mw6-13nov23-081	F. africanum	1027849	1278.45	0.981649	0.0282668	1411	508.874	0.502276	0.976628	1	0.0276749	0.989104	0.999653	296	79982	80278	348	10938
TNGK-Kigoma-Offshore-0m-SRR7990717	Tanganyika	0	N-Mw6-13nov23-081	F. africanum	1027849	833.263	0.978718	0.026704	927	350.419	0.345875	0.974638	1	0.026101	0.987755	0.999623	318	76555	7587746	378	12267
TNGK-Kigoma-Offshore-40m-SRR7990546	Tanganyika	40	N-Mw6-13nov23-081	F. africanum	1027849	2065.73	0.980894	0.0266	2333	859.081	0.847941	0.977845	1	0.0260999	0.987649	0.999572	374	74762	18480624	430	12414
TNGK-Mahale-A-surface-SRR7988745	Tanganyika	0	N-Mw6-13nov23-081	F. africanum	1027849	1165.74	0.981238	0.0281302	1285	464.2	0.45818	0.976665	1	0.0275403	0.989249	0.999652	297	79523	79820	349	10793
TNGK-Mahale-Deep-Cast-100m-SRR7053050	Tanganyika	100	N-Mw6-13nov23-081	F. africanum	1027849	859.909	0.979569	0.0281464	947	343.463	0.33901	0.975112	1	0.027573	0.989154	0.999688	262	79961	7711848	313	10871
TNGK-Mahale-Deep-Cast-10m-SRR7985618	Tanganyika	10	N-Mw6-13nov23-081	F. africanum	1027849	699.891	0.978875	0.0282108	771	278.442	0.274831	0.974689	1	0.0276071	0.989102	0.999638	309	81946	6345224	363	10918
TNGK-Mahale-Deep-Cast-200m-SRR7008372	Tanganyika	200	N-Mw6-13nov23-081	F. africanum	1027849	242.537	0.97693	0.0278064	264	97.2506	0.0959895	0.971331	1	0.0271623	0.989206	0.999656	294	83270	2619622	343	10777
TNGK-Mahale-Deep-Cast-400m-SRR7979709	Tanganyika	400	N-Mw6-13nov23-081	F. africanum	1027849	357.203	0.977237	0.0278941	389	144.839	0.14296	0.973269	1	0.0273196	0.98905	0.999653	295	82660	3718448	347	10954
TNGK-Mahale-Deep-Cast-50m-SRR7052762	Tanganyika	50	N-Mw6-13nov23-081	F. africanum	1027849	290.12	0.9778	0.0279927	319	116.688	0.115175	0.971784	1	0.0273425	0.989008	0.999643	310	82838	2623886	357	10979
TNGK-Mahale-N1-surface-SRR7985596	Tanganyika	0	N-Mw6-13nov23-081	F. africanum	1027849	1227.57	0.980241	0.0282023	1350	486.729	0.480418	0.976636	1	0.0276227	0.989334	0.999646	298	79613	79911	355	10707
TNGK-Mahale-N5-surface-SRR7985617	Tanganyika	0	N-Mw6-13nov23-081	F. africanum	1027849	1224.78	0.980144	0.028315	1350	484.104	0.477827	0.976732	1	0.0277025	0.989337	0.999666	281	80098	80379	335	10705
TNGK-Mahale-S4-surface-SRR7985395	Tanganyika	0	N-Mw6-13nov23-081	F. africanum	1027849	985.407	0.979063	0.0285164	1095	381.648	0.376699	0.975536	1	0.0279126	0.989316	0.99966	287	81116	81403	341	10713
TNGK-Mahale-S9-surface-SRR7052951	Tanganyika	0	N-Mw6-13nov23-081	F. africanum	1027849	1159	0.98062	0.0282364	1275	458.034	0.452094	0.976186	1	0.0276323	0.989304	0.999644	303	79719	80022	357	10732
ATTRE-SM-16jul20	Attersee	5	MaE-M19	F. temperatum	1074822	479.634	0.982605	0.0224502	507	299.701	0.289081	0.957353	1	0.022082	0.986587	0.997021	2779	67175	69954	13802	3065
ATTRE-SM-26apr22	Attersee	5	MaE-M19	F. temperatum	1074822	262.71	0.97434	0.0243284	295	125.603	0.121152	0.945316	1	0.023658	0.986589	0.997	2739	74982	77721	3048	13626
ATTRH-SM-16jul20	Attersee	150	MaE-M19	F. temperatum	1074822	324.182	0.966874	0.0253636	369	163.004	0.157228	0.942148	1	0.0246748	0.98443	0.996595	3069	78183	81252	15767	3448
ATTRH-SM-26apr22	Attersee	150	MaE-M19	F. temperatum	1074822	523.57	0.979897	0.0252221	578	267.897	0.258404	0.952993	1	0.0246604	0.985761	0.996887	2840	76433	79273	3189	14585
CE-Jul18	Constance	5	MaE-M19	F. temperatum	1074822	4464.72	0.997332	0.0227218	4993	1959.55	1.89012	0.974245	1	0.0225325	0.986943	0.997557	2308	66745	69053	13673	2558
CE-Oct18	Constance	5	MaE-M19	F. temperatum	1074822	2803.63	0.99157	0.0228477	3167	1221.17	1.1779	0.964586	1	0.0225589	0.986982	0.997455	2388	66746	69134	2639	13496
CH-Jul18	Constance	200	MaE-M19	F. temperatum	1074822	500.448	0.963226	0.0254328	538	244.835	0.236159	0.945686	1	0.0247181	0.986765	0.997383	2372	78225	80597	13453	2660
CH-Oct18	Constance	200	MaE-M19	F. temperatum	1074822	1035.45	0.97452	0.0264472	1142	480.8	0.463763	0.950287	1	0.0257929	0.986478	0.997407	2336	81059	83395	2648	13811
Erie_SRR5273323	Erie	0	MaE-M19	F. temperatum	1074822	84.6737	0.94521	0.0206448	96	39.6047	0.0382013	0.922924	1	0.0185378	0.977598	0.989895	9137	60862	69999	10024	22222
Erie_SRR5273325	Erie	0	MaE-M19	F. temperatum	1074822	21.4367	0.929934	0.0192217	23	10.8537	0.0104691	0.882383	1	0.0108	0.97834	0.988756	9948	44523	54471	10664	20542
Erken-D7-ERR4193667	Erken	14	MaE-M19	F. temperatum	1074822	80.7494	0.943961	0.0260589	80	46.2824	0.0446425	0.923968	1	0.0245675	0.987446	0.997215	2451	80165	82616	12467	2766
Erken-D8-ERR4195032	Erken	16	MaE-M19	F. temperatum	1074822	113.794	0.947193	0.0264344	115	61.4352	0.0592583	0.930642	1	0.0252549	0.987475	0.997317	2373	81882	84255	12528	2684
Erken-D9-ERR4210440	Erken	18	MaE-M19	F. temperatum	1074822	78.44	0.94541	0.0261609	77	47.1053	0.0454362	0.922713	1	0.0245962	0.987246	0.997219	2458	80058	82516	2758	12649
Erken-UppL3-ERR4194707	Erken	20	MaE-M19	F. temperatum	1074822	87.2102	0.947519	0.0251123	89	47.4143	0.0457343	0.924545	1	0.0237388	0.987723	0.997263	2424	76598	79022	2720	12200
GE-07nov19	Greifensee	5	MaE-M19	F. temperatum	1074822	705.652	0.989345	0.0261966	728	313.59	0.302478	0.966374	1	0.0260997	0.988067	0.998194	1660	80500	82160	1876	12395
GH-07nov19	Greifensee	15	MaE-M19	F. temperatum	1074822	675.621	0.991272	0.0262803	693	303.742	0.292979	0.965685	1	0.0261062	0.988095	0.998221	1622	80860	82482	12357	1846
Huron_SRR5260286	Huron	0	MaE-M19	F. temperatum	1074822	17.0531	0.913805	0.0198814	18	9.96818	0.00961497	0.835838	1	0	0.979902	0.989586	8730	39944	48674	9356	18056
Huron_SRR5260362	Huron	0	MaE-M19	F. temperatum	1074822	116.217	0.941242	0.0218365	135	60.9965	0.0588351	0.917755	1	0.0204819	0.978637	0.990569	8423	63493	71916	9303	21073
Huron_SRR5260390	Huron	0	MaE-M19	F. temperatum	1074822	12.6724	0.907442	0.0193653	14	7.4765	0.00721158	0.811402	0.999986		0.980256	0.989073	8979	32901	41880	17219	9530
Huron_SRR5260432	Huron	0	MaE-M19	F. temperatum	1074822	112.089	0.939931	0.0218786	130	58.3554	0.0562876	0.917936	1	0.0204013	0.978576	0.99067	8334	63676	72010	21137	9205
Huron_SRR5260446	Huron	0	MaE-M19	F. temperatum	1074822	116.647	0.943968	0.0220167	136	60.6566	0.0585073	0.918186	1	0.0204575	0.978363	0.990734	8243	63893	72136	21353	9144
Huron_SRR5260447	Huron	0	MaE-M19	F. temperatum	1074822	29.6069	0.922358	0.0203641	27	21.9554	0.0211775	0.85282	1	0.0160486	0.979765	0.990229	8275	48219	56494	8956	18548
Huron_SRR5260448	Huron	0	MaE-M19	F. temperatum	1074822	17.7329	0.901479	0.018666	15	14.4115	0.0139009	0.781746	1	0.0125483	0.981744	0.990265	7654	34272	41926	8180	15339
Huron_SRR5260494	Huron	0	MaE-M19	F. temperatum	1074822	70.2721	0.929619	0.0206554	65	51.5779	0.0497503	0.890767	1	0.0187211	0.978808	0.99027	8504	57084	65588	9316	20290
Huron_SRR5260495	Huron	0	MaE-M19	F. temperatum	1074822	203.366	0.940728	0.0214305	236	107.235	0.103435	0.921924	1	0.0205459	0.977963	0.990311	8723	62796	71519	21837	9601
Huron_SRR5260496	Huron	0	MaE-M19	F. temperatum	1074822	20.8004	0.907654	0.019311	18	16.832	0.0162356	0.803405	1	0.0138035	0.979937	0.989657	8306	39476	47782	17325	8931
Huron_SRR5260497	Huron	0	MaE-M19	F. temperatum	1074822	28.091	0.922171	0.0209622	31	15.4342	0.0148873	0.870776	1	0.0133865	0.979413	0.990091	8533	53525	62058	19268	9274
Huron_SRR5273324	Huron	0	MaE-M19	F. temperatum	1074822	21.0616	0.916861	0.0211121	23	11.3584	0.0109559	0.860742	1	0.00957566	0.978801	0.989512	8969	47996	56965	9703	19612
KE-07aug19	Klicava	0.5	MaE-M19	F. temperatum	1074822	264.726	0.971002	0.0335069	160	266.21	0.256777	0.944553	1	0.0326941	0.974581	0.996528	2999	105500	108499	25806	3525
KE-08aug18	Klicava	0.5	MaE-M19	F. temperatum	1074822	1146.04	0.968233	0.0313688	847	902.628	0.870645	0.959765	1	0.031067	0.979536	0.99712	2561	98123	100684	21110	2971
KE-20nov19	Klicava	0.5	MaE-M19	F. temperatum	1074822	178.272	0.953813	0.0303107	143	129.267	0.124687	0.939615	1	0.0293622	0.982339	0.997147	2478	94880	97358	17836	2881
KE-21nov18	Klicava	0.5	MaE-M19	F. temperatum	1074822	710.895	0.964921	0.0306076	549	521.58	0.503099	0.949002	1	0.0300059	0.98154	0.997291	2395	95138	97533	2763	18829
KE-25apr19	Klicava	0.5	MaE-M19	F. temperatum	1074822	1661.55	0.966562	0.0302934	1312	1170.43	1.12896	0.95806	1	0.0298435	0.981424	0.997202	2513	94413	96926	2881	19129
KH-07aug19	Klicava	25	MaE-M19	F. temperatum	1074822	232.756	0.95562	0.0305257	166	196.852	0.189877	0.942302	1	0.0296734	0.979294	0.996936	2680	95901	98581	3103	20971
KH-20nov19	Klicava	25	MaE-M19	F. temperatum	1074822	181.227	0.953226	0.0314424	122	158.606	0.152986	0.9381	1	0.0303912	0.977059	0.996803	2765	99809	102574	3224	23131
KH-21nov18	Klicava	25	MaE-M19	F. temperatum	1074822	307.192	0.956376	0.0303146	245	224.147	0.216205	0.943055	1	0.0295879	0.982063	0.997236	2427	95337	97764	2802	18181
KH-25apr19	Klicava	25	MaE-M19	F. temperatum	1074822	542.78	0.96029	0.0295659	454	347.877	0.33555	0.95018	1	0.0290476	0.983055	0.997243	2447	93394	95841	17305	2816
MaE-04nov19	Maggiore	5	MaE-M19	F. temperatum	1074822	186.589	0.954749	0.0236511	198	90.0541	0.0868631	0.942277	1	0.0226437	0.986834	0.997306	2432	74154	76586	13334	2728
Maggiore-300m	Maggiore	300	MaE-M19	F. temperatum	1074822	221.736	0.950197	0.0296052	143	207.284	0.199939	0.937664	1	0.0284168	0.974717	0.99585	3683	96321	100004	25481	4182
Maggiore-5m	Maggiore	5	MaE-M19	F. temperatum	1074822	1405.83	0.965159	0.0233135	1614	576.159	0.555743	0.954726	1	0.0228567	0.986653	0.997375	2405	69130	71535	13696	2694
MaH-04nov19	Maggiore	300	MaE-M19	F. temperatum	1074822	141.461	0.941999	0.0275772	75	154.644	0.149164	0.916455	1	0.0248518	0.969217	0.993096	6067	84356	90423	30322	6801
ME-08apr19	Medard	5	MaE-M19	F. temperatum	1074822	78.3051	0.915359	0.0088684	63	140.945	0.135951	0.857585	1	0.00812356	0.983021	0.99122	7789	24911	32700	15650	8093
ME-09jul19	Medard	5	MaE-M19	F. temperatum	1074822	107.131	0.917226	0.0113845	39	269.078	0.259543	0.859877	1	0.0155583	0.981735	0.991362	7595	30830	38425	16881	7983
ME-21oct19	Medard	5	MaE-M19	F. temperatum	1074822	108.221	0.924641	0.0116912	46	425.349	0.410277	0.874265	1	0.0131815	0.982974	0.992718	6470	32585	39055	6843	15999
MH-08apr19	Medard	40	MaE-M19	F. temperatum	1074822	28.1027	0.877529	0.0104429	11	69.9687	0.0674894	0.753658	1	0.0141675	0.983474	0.990946	7052	21074	28126	13387	7334
MH-09jul19	Medard	40	MaE-M19	F. temperatum	1074822	102.283	0.917585	0.0117447	34	266.463	0.257021	0.85745	1	0.0164179	0.981732	0.991584	7365	31285	38650	7756	16836
MH-21oct19	Medard	40	MaE-M19	F. temperatum	1074822	32.4445	0.888322	0.0102291	15	87.6762	0.0845694	0.789196	1	0.0150669	0.983646	0.990909	7430	22124	29554	7711	13872
MiE-14oct19	Milada	5	MaE-M19	F. temperatum	1074822	111.214	0.93705	0.0173503	82	291.5	0.281171	0.908331	1	0.0161284	0.986823	0.99601	3561	52899	56460	12865	3895
MiE-16apr19	Milada	5	MaE-M19	F. temperatum	1074822	69.7928	0.930121	0.0171952	62	83.1652	0.0802183	0.900113	1	0.0155882	0.986203	0.995877	3662	51719	55381	13348	3989
MiE-22jul19	Milada	5	MaE-M19	F. temperatum	1074822	109.614	0.933161	0.0161226	96	193.602	0.186742	0.909315	1	0.0150421	0.988165	0.995857	3721	48367	52088	11567	4049
MiH-14oct19	Milada	15	MaE-M19	F. temperatum	1074822	16.1233	0.895302	0.0151469	14	16.6081	0.0160196	0.78344	0.999999	0.0113626	0.986604	0.994814	4143	30749	34892	4367	11280
MiH-22jul19	Milada	15	MaE-M19	F. temperatum	1074822	47.3167	0.923911	0.0167122	42	57.9199	0.0558676	0.881897	1	0.0148161	0.987561	0.995745	3722	47187	50909	4033	11791
MoE-02may19	Mondsee	5	MaE-M19	F. temperatum	1074822	393.087	0.968045	0.0213261	437	172.598	0.166482	0.943868	1	0.0206914	0.987407	0.9972	2588	61111	63699	12775	2841
MoE-23oct19	Mondsee	5	MaE-M19	F. temperatum	1074822	831.101	0.972448	0.021081	917	376.128	0.3628	0.950035	1	0.0205864	0.987351	0.99723	2571	60366	62937	2829	12916
Montoje-130807-EF-SRR5818198	Montoje	3	MaE-M19	F. temperatum	1074822	246.557	0.928316	0.0324728	107	326.917	0.315333	0.893902	1	0.0318401	0.964115	0.988504	9546	92137	101683	11045	34478
Montoje-140807-MF-SRR5818197	Montoje	7	MaE-M19	F. temperatum	1074822	162.034	0.927023	0.0321132	78	201.581	0.194439	0.895616	1	0.0317873	0.96672	0.989523	8696	90901	99597	32036	10085
MsE-01oct19	Most	5	MaE-M19	F. temperatum	1074822	221.148	0.959995	0.0149111	228	232.798	0.224549	0.942588	1	0.0142407	0.990645	0.9976	2237	47723	49960	2431	9478
MsE-30apr19	Most	5	MaE-M19	F. temperatum	1074822	536.662	0.967015	0.0151217	607	309.407	0.298444	0.957384	1	0.0148969	0.990507	0.997562	2322	48316	50638	9768	2509
MsE-30jul19	Most	5	MaE-M19	F. temperatum	1074822	1400.09	0.965601	0.0149365	1563	871.512	0.84063	0.960113	1	0.0148125	0.990502	0.997515	2383	47161	49544	2564	9801
MsH-01oct19	Most	50	MaE-M19	F. temperatum	1074822	288.346	0.964654	0.0153039	313	192.772	0.185942	0.947847	1	0.0148298	0.990671	0.997714	2149	48606	50755	2329	9504
MsH-30apr19	Most	50	MaE-M19	F. temperatum	1074822	642.647	0.967253	0.0151991	721	382.898	0.369331	0.959597	1	0.0149774	0.99044	0.997525	2368	48271	50639	2553	9860
MsH-30jul19	Most	50	MaE-M19	F. temperatum	1074822	784.095	0.967091	0.0151986	879	475.867	0.459005	0.959017	1	0.0149643	0.990622	0.997686	2212	47804	50016	9667	2385
SimonC-130805-EF-SRR5818195	Simoncouche	2	MaE-M19	F. temperatum	1074822	171.28	0.925634	0.0309744	54	266.897	0.25744	0.900451	1	0.0295953	0.963647	0.989052	9244	88301	97545	35183	10596
SimonC-130805-MF-SRR5818245	Simoncouche	5	MaE-M19	F. temperatum	1074822	88.5907	0.918924	0.0305358	28	139.198	0.134265	0.862349	1	0.0252439	0.963043	0.988317	9543	76041	85584	10829	34254
SimonC-140806-EF-SRR5818246	Simoncouche	2	MaE-M19	F. temperatum	1074822	196.123	0.928227	0.0292996	122	221.235	0.213396	0.910492	1	0.0283097	0.971057	0.990019	8517	84481	92998	9768	28324
SimonC-140806-MF-SRR5818243	Simoncouche	5	MaE-M19	F. temperatum	1074822	166.715	0.925443	0.0292913	103	188.85	0.182158	0.90711	1	0.0282169	0.971058	0.990002	8503	84183	92686	28218	9748
TRAUE-SM-17jul20	Traunsee	5	MaE-M19	F. temperatum	1074822	1078.56	0.974941	0.0233399	1175	541.128	0.521954	0.94914	1	0.0227916	0.986434	0.99693	2815	67825	70640	13839	3132
TRAUE-SM-29apr22	Traunsee	5	MaE-M19	F. temperatum	1074822	1127.8	0.954454	0.0240703	1268	542.521	0.523298	0.949054	1	0.0237422	0.985273	0.996406	3289	77986	81275	3666	15022
TRAUH-SM-17jul20	Traunsee	150	MaE-M19	F. temperatum	1074822	1055.68	0.980841	0.0255897	1209	513.853	0.495645	0.951962	1	0.0250498	0.984747	0.996645	3024	75660	78684	15607	3433
TRAUH-SM-29apr22	Traunsee	150	MaE-M19	F. temperatum	1074822	1913.22	0.982537	0.0249027	2196	908.428	0.876239	0.95667	1	0.0243249	0.985202	0.996781	2950	72209	75159	15216	3310
ZLE-06aug19	Zlutice	5	MaE-M19	F. temperatum	1074822	190.465	0.889259	0.0273081	92	229.827	0.221683	0.821028	1	0.025354	0.958092	0.979599	15942	69256	85198	36982	18003
ZLE-19nov19	Zlutice	5	MaE-M19	F. temperatum	1074822	365.137	0.892133	0.0258736	157	459.603	0.443318	0.837138	1	0.0246031	0.956517	0.978825	17006	68748	85754	39125	19053
ZE_Jul18	Zurich	5	MaE-M19	F. temperatum	1074822	3880.04	0.980583	0.0227473	4376	1684.63	1.62493	0.957506	1	0.0222179	0.98741	0.99758	2250	64425	66675	2491	12957
ZE_Oct18	Zurich	5	MaE-M19	F. temperatum	1074822	1466.11	0.977309	0.0230559	1637	637.958	0.615353	0.952806	1	0.0224939	0.987129	0.99751	2296	66313	68609	13181	2550
ZE-13may13	Zurich	5	MaE-M19	F. temperatum	1074822	376.988	0.967306	0.0234241	426	164.407	0.158582	0.945861	1	0.0225935	0.98728	0.997658	2130	67897	70027	12932	2381
ZE-13nov19	Zurich	5	MaE-M19	F. temperatum	1074822	699.967	0.981413	0.023488	779	296.7	0.286187	0.951076	1	0.0228408	0.98703	0.997568	2230	68946	71176	2486	13258
ZE-13oct10	Zurich	5	MaE-M19	F. temperatum	1074822	667.593	0.975968	0.0237669	733	300.47	0.289823	0.947821	1	0.0230612	0.987081	0.99759	2214	68386	70600	2455	13161
ZE-17mar17	Zurich	2	MaE-M19	F. temperatum	1074822	175.5	0.948209	0.0236264	198	78.3334	0.0755578	0.939012	1	0.0224131	0.987243	0.997544	2210	69980	72190	2479	12875
ZH-13may13	Zurich	80	MaE-M19	F. temperatum	1074822	237.079	0.960489	0.0242344	271	103.413	0.0997482	0.941582	1	0.0231817	0.987015	0.9976	2157	71434	73591	13141	2429
Zurich-5m	Zurich	5	MaE-M19	F. temperatum	1074822	137.995	0.952212	0.0227014	153	59.6539	0.0575402	0.93871	1	0.0215245	0.987294	0.997327	2424	67250	69674	2697	12820
BiE-22sep22	Biwa	5	LSUCC0530	F. commune	1160202	519.522	0.910008	0.0172856	623	273.29	0.253722	0.871287	1	0.0168376	0.986502	0.995489	4199	50792	54991	4560	13645
BiH-22sep22	Biwa	50	LSUCC0530	F. commune	1160202	49.4581	0.861589	0.0180709	49	45.0285	0.0418043	0.839424	1	0.0171573	0.98651	0.99527	4215	56963	61178	4607	13138
LBG-augE-5m-2016	Biwa	5	LSUCC0530	F. commune	1160202	401.275	0.924586	0.0179089	489	208.92	0.19396	0.879359	1	0.0175097	0.985956	0.99528	4434	53015	57449	4815	14328
LBG-julE-5m-2016	Biwa	5	LSUCC0530	F. commune	1160202	178.618	0.900691	0.0180542	218	93.8246	0.0871064	0.854088	1	0.0172958	0.98606	0.99539	4210	53332	57542	4568	13813
LBG-sepE-5m-2016	Biwa	5	LSUCC0530	F. commune	1160202	145.038	0.9101	0.017957	174	76.4193	0.0709474	0.856883	1	0.0171798	0.986226	0.995523	4107	52775	56882	13694	4451
KE-07aug19	Klicava	0.5	LSUCC0530	F. commune	1160202	72.1972	0.888766	0.0170795	23	328.184	0.304684	0.857067	1	0.0281883	0.977903	0.990698	8601	45336	53937	21973	9250
KE-25apr19	Klicava	0.5	LSUCC0530	F. commune	1160202	81.412	0.891002	0.0184065	20	403.507	0.374614	0.855717	1	0.0276041	0.97705	0.990616	8587	48545	57132	9316	22785
KH-25apr19	Klicava	25	LSUCC0530	F. commune	1160202	27.2816	0.87596	0.0169556	10	116.754	0.108394	0.775505	1	0.0227068	0.978952	0.990259	8218	34258	42476	8764	18938
Mw10-20nov23	Malawi	50	LSUCC0530	F. commune	1160202	19.2911	0.758361	0.0184204	15	27.5946	0.0256187	0.685635	1	0.0143846	0.975303	0.986143	10361	39668	50029	19646	11023
Mw1-16nov23	Malawi	5	LSUCC0530	F. commune	1160202	245.294	0.812372	0.0204343	277	213.785	0.198477	0.786342	1	0.0200245	0.973355	0.987165	10764	61781	72545	24309	11710
Mw13-23nov23	Malawi	5	LSUCC0530	F. commune	1160202	377.446	0.822804	0.0218211	417	315.173	0.292606	0.80015	1	0.0214375	0.974574	0.989308	9052	64443	73495	23604	9926
Mw14-23nov23	Malawi	50	LSUCC0530	F. commune	1160202	109.748	0.807099	0.0215565	123	91.0047	0.0844884	0.777906	1	0.0209591	0.974913	0.989392	8722	65876	74598	9574	22642
Mw15-23nov23	Malawi	100	LSUCC0530	F. commune	1160202	78.0467	0.802609	0.0209597	88	74.2952	0.0689754	0.766479	1	0.0199196	0.975504	0.989347	8695	59493	68188	21784	9473
Mw2-16nov23	Malawi	50	LSUCC0530	F. commune	1160202	269.095	0.817803	0.0206672	283	259.465	0.240886	0.788593	1	0.0201853	0.973906	0.987634	10435	59694	70129	23874	11314
Mw5-13nov23	Malawi	5	LSUCC0530	F. commune	1160202	793.168	0.831509	0.0215027	834	681.737	0.632922	0.80984	1	0.021125	0.973951	0.98864	9763	63651	73414	10674	24475
Mw6-13nov23	Malawi	50	LSUCC0530	F. commune	1160202	138.247	0.807044	0.021104	140	121.313	0.112627	0.777261	1	0.0204548	0.973881	0.988469	9518	65162	74680	23554	10398
Mw9-20nov23	Malawi	5	LSUCC0530	F. commune	1160202	79.5704	0.806934	0.0216927	84	69.845	0.0648438	0.765714	1	0.0204333	0.975414	0.989611	8469	61046	69515	21842	9229
ME-08apr19	Medard	5	LSUCC0530	F. commune	1160202	133.648	0.723476	0.0183699	16	277.033	0.257196	0.595075	1	0.0175069	0.95285	0.968863	19946	36223	56169	32553	21497
ME-09jul19	Medard	5	LSUCC0530	F. commune	1160202	157.32	0.727334	0.0198625	15	368.848	0.342437	0.615426	1	0.0199263	0.953007	0.969847	19779	40405	60184	21530	33554
ME-21oct19	Medard	5	LSUCC0530	F. commune	1160202	426.137	0.771833	0.0182547	45	933.444	0.866606	0.666702	1	0.0173527	0.949143	0.966277	24215	40995	65210	39338	26085
MH-08apr19	Medard	40	LSUCC0530	F. commune	1160202	151.695	0.722433	0.0200089	14	354.595	0.329204	0.605367	1	0.0199624	0.95348	0.970378	19146	39576	58722	20805	32673
MiE-14oct19	Milada	5	LSUCC0530	F. commune	1160202	291.266	0.878924	0.0219828	36	618.347	0.574071	0.722173	1	0.0193458	0.954975	0.978018	16876	51771	68647	37725	18418
MiE-16apr19	Milada	5	LSUCC0530	F. commune	1160202	69.8354	0.861105	0.021493	10	143.261	0.133003	0.628774	1	0.0187344	0.959492	0.98076	12861	42300	55161	29551	14036
MiE-22jul19	Milada	5	LSUCC0530	F. commune	1160202	206.361	0.923932	0.0212822	29	428.029	0.39738	0.838161	1	0.0202619	0.961505	0.984217	14051	58012	72063	15348	37434
MsE-01oct19	Most	5	LSUCC0530	F. commune	1160202	235.257	0.751436	0.0185222	29	506.026	0.469793	0.648887	1	0.0177659	0.951465	0.96809	22213	39791	62004	24023	36539
MsE-30apr19	Most	5	LSUCC0530	F. commune	1160202	92.2971	0.735319	0.0197499	10	215.271	0.199856	0.591767	1	0.0198777	0.954286	0.970725	18561	37907	56468	20099	31386
MsE-30jul19	Most	5	LSUCC0530	F. commune	1160202	401.965	0.807103	0.0209835	53	913.291	0.847896	0.693796	1	0.0202435	0.950876	0.969769	22331	48729	71060	24334	39542
MsH-01oct19	Most	50	LSUCC0530	F. commune	1160202	105.271	0.743262	0.0197336	14	238.542	0.221462	0.601994	1	0.0195622	0.954326	0.971107	18652	38369	57021	20180	31900
MsH-30apr19	Most	50	LSUCC0530	F. commune	1160202	133.585	0.756776	0.0196478	15	312.862	0.29046	0.627504	1	0.019819	0.953337	0.970389	19952	40803	60755	33972	21558
MsH-30jul19	Most	50	LSUCC0530	F. commune	1160202	197.876	0.780148	0.0205753	26	457.871	0.425086	0.654077	1	0.0205645	0.95253	0.970506	20562	44630	65192	36023	22382
TNGK-Kigoma-12-surface-SRR7990527	Tanganyika	0	LSUCC0530	F. commune	1160202	117.131	0.834944	0.0176686	141	120.973	0.112311	0.798713	1	0.0168944	0.972476	0.985151	12844	50843	63687	25506	13760
TNGK-Kigoma-Deep-Cast-0m-SRR7053051	Tanganyika	0	LSUCC0530	F. commune	1160202	101.275	0.825561	0.0176154	121	110.294	0.102397	0.792712	1	0.0166934	0.972723	0.985188	12717	49373	62090	13623	25087
TNGK-Kigoma-Deep-Cast-100m-SRR7990334	Tanganyika	100	LSUCC0530	F. commune	1160202	40.7186	0.813057	0.0171849	47	44.9253	0.0417085	0.760175	1	0.0140715	0.97344	0.985407	12062	45564	57626	12870	23425
TNGK-Kigoma-Deep-Cast-1200m-SRR7008010	Tanganyika	1200	LSUCC0530	F. commune	1160202	22.8396	0.796042	0.016494	25	31.2228	0.0289871	0.733121	1	0.0123612	0.973974	0.984997	12043	38995	51038	12761	22137
TNGK-Kigoma-Deep-Cast-150m-SRR7052952	Tanganyika	150	LSUCC0530	F. commune	1160202	26.3565	0.801816	0.0166171	30	31.8429	0.0295628	0.740599	1	0.0112079	0.973606	0.985072	12086	41154	53240	22679	12827
TNGK-Kigoma-Deep-Cast-250m-SRR7989281	Tanganyika	250	LSUCC0530	F. commune	1160202	27.2255	0.801866	0.0166844	30	34.3406	0.0318817	0.744077	1	0.0117393	0.973532	0.985043	12118	41802	53920	12912	22849
TNGK-Kigoma-Deep-Cast-300m-SRR7979708	Tanganyika	300	LSUCC0530	F. commune	1160202	16.0376	0.785237	0.015962	17	22.2669	0.0206725	0.711561	0.999999	0.0142866	0.974603	0.984879	11829	32742	44571	12483	20967
TNGK-Kigoma-Deep-Cast-35m-SRR7053298	Tanganyika	35	LSUCC0530	F. commune	1160202	88.593	0.826054	0.0176135	105	101.759	0.0944722	0.789948	1	0.0166046	0.972633	0.985136	12699	49412	62111	13623	25082
TNGK-Kigoma-Offshore-0m-SRR7990717	Tanganyika	0	LSUCC0530	F. commune	1160202	70.3554	0.823311	0.0173371	83	78.8894	0.0732406	0.78131	1	0.0161276	0.972977	0.985336	12392	49561	61953	13293	24496
TNGK-Kigoma-Offshore-40m-SRR7990546	Tanganyika	40	LSUCC0530	F. commune	1160202	157.529	0.839463	0.0178093	191	167.082	0.155119	0.804827	1	0.0172142	0.972344	0.9851	12947	51598	64545	25824	13913
TNGK-Mahale-A-surface-SRR7988745	Tanganyika	0	LSUCC0530	F. commune	1160202	93.5017	0.82318	0.0174584	113	94.6597	0.0878817	0.789823	1	0.016548	0.972583	0.98514	12717	48946	61663	25124	13617
TNGK-Mahale-Deep-Cast-100m-SRR7053050	Tanganyika	100	LSUCC0530	F. commune	1160202	56.9237	0.816871	0.0173492	66	66.9975	0.0622002	0.771729	1	0.0156494	0.972984	0.985203	12385	47431	59816	13249	24189
TNGK-Mahale-Deep-Cast-10m-SRR7985618	Tanganyika	10	LSUCC0530	F. commune	1160202	48.9004	0.81106	0.0170948	56	63.7852	0.0592179	0.762781	1	0.0149514	0.97304	0.985134	12265	47229	59494	13156	23859
TNGK-Mahale-Deep-Cast-200m-SRR7008372	Tanganyika	200	LSUCC0530	F. commune	1160202	16.4799	0.787846	0.0159107	17	24.0033	0.0222845	0.715088	1	0.0138392	0.974545	0.984744	12001	32883	44884	21119	12657
TNGK-Mahale-Deep-Cast-400m-SRR7979709	Tanganyika	400	LSUCC0530	F. commune	1160202	22.9701	0.796184	0.0164317	24	34.3282	0.0318701	0.730302	1	0.0122749	0.974069	0.985002	11981	38787	50768	21971	12708
TNGK-Mahale-Deep-Cast-50m-SRR7052762	Tanganyika	50	LSUCC0530	F. commune	1160202	20.2147	0.795016	0.0164594	22	27.0174	0.0250828	0.724937	1	0.0132885	0.974102	0.98513	11794	37178	48972	12507	21782
TNGK-Mahale-N1-surface-SRR7985596	Tanganyika	0	LSUCC0530	F. commune	1160202	98.2255	0.826969	0.0174384	118	99.1438	0.0920448	0.788765	1	0.0165835	0.972513	0.985061	12778	48663	61441	13671	25154
TNGK-Mahale-N5-surface-SRR7985617	Tanganyika	0	LSUCC0530	F. commune	1160202	98.0919	0.82429	0.017546	118	99.9712	0.0928129	0.790446	1	0.0166603	0.972519	0.98505	12790	49171	61961	13710	25202
TNGK-Mahale-S4-surface-SRR7985395	Tanganyika	0	LSUCC0530	F. commune	1160202	74.6746	0.819179	0.0173974	90	81.6198	0.0757755	0.783842	1	0.0162761	0.972456	0.984944	12797	48350	61147	13692	25049
TNGK-Mahale-S9-surface-SRR7052951	Tanganyika	0	LSUCC0530	F. commune	1160202	79.2364	0.822109	0.0175134	94	89.9727	0.0835303	0.783348	1	0.0163108	0.972641	0.984976	12750	48250	61000	24865	13654
BRZL-Tite-SRR19581707	Tiete	0	LSUCC0530	F. commune	1160202	67.1621	0.913172	0.0172745	79	34.9573	0.0324542	0.862205	1	0.0157406	0.987329	0.996216	3477	50324	53801	3785	12675
BRZL-Tite-SRR19581708	Tiete	0	LSUCC0530	F. commune	1160202	77.8981	0.915129	0.0174484	93	40.7133	0.037798	0.866347	1	0.016163	0.98734	0.996288	3422	50318	53740	12725	3731
BRZL-Tite-SRR19581709	Tiete	0	LSUCC0530	F. commune	1160202	53.0466	0.908811	0.0172312	62	28.1227	0.026109	0.854793	1	0.014761	0.987296	0.996089	3577	49766	53343	12599	3879

## Sheet: S5_Diversity_Stats
Supplementary Data 5: Statistical tests for nucleotide diverisity among the three Fontibacterium species.
Descriptive statistics of nucleotide diversity for each putative species.
Species	Sample Size (N)	Mean Diversity	SD Diversity	Median Diversity	Min Diversity	Max Diversity
F. africanum	30	0.0298	0.00281	0.0282	0.0266	0.0347
F. commune	53	0.0186	0.00179	0.0179	0.0159	0.022
F. temperatum	80	0.023	0.00592	0.0234	0.0089	0.0335
Shapiro-Wilk test was used to assess the normality of the nucleotide diversity data within each species. Levene's test was used to assess the homogeneity of variance across all three species.
Test	Group(s)	Test Statistic	p-value
Normality
Shapiro-Wilk	F. africanum	W = 0.763	< 0.0001
Shapiro-Wilk	F. commune	W = 0.884	< 0.001
Shapiro-Wilk	F. temperatum	W = 0.969	0.0339
Homogeneity of Variance
Levene's Test	All Species	F(2, 162) = 23.166	< 0.0001
Kruskal-Wallis test for differences in nucleotide diversity among species
Test	Chi-squared (χ²)	Degrees of Freedom (df)	p-value
Kruskal-Wallis	71.596	2	< 0.0001
Dunn's post-hoc test for pairwise comparisons of species diversity
Comparison	Z-statistic	Adjusted p-value	Significance
F. africanum vs. F. commune	8.408	< 0.0001	***
F. africanum vs. F. temperatum	5.057	< 0.0001	***
F. commune vs. F. temperatum	-4.778	< 0.0001	***
Comparison of nucleotide diversity between Malawi and Tanganyika populations of F. africanum
Test / Metric	Test Statistic	Value	p-value
Mann-Whitney U test	W	200	< 0.0001

## Sheet: S6_FST_matrix
Supplementary Data 6: Fixation index (FST) matrix scores calculated for F. temperatum and F. commune.
F. temperatum	Attersee	Constance	Erie	Erken	Greifensee	Huron	Klicava	Maggiore	Medard	Milada	Mondsee	Montoje	Most	Simoncouche	Traunsee	Zlutice	Zurich
Attersee	0	0.0427322	0.205433	0.0561396	0.0530439	0.190934	0.121984	0.098556	0.260369	0.113503	0.0341604	0.282131	0.09317	0.253198	0.0196881	0.310891	0.040889
Constance	0.0427322	0	0.139941	0.0562705	0.0338611	0.142212	0.123117	0.107939	0.267278	0.0807548	0.0364945	0.288209	0.086773	0.244202	0.0535063	0.323174	0.0112902
Erie	0.205433	0.139941	0	0.211303	0.188348	0.0678122	0.22953	0.141655	0.312475	0.160379	0.233033	0.258332	0.269282	0.201952	0.202175	0.320732	0.168925
Erken	0.0561396	0.0562705	0.211303	0	0.0187089	0.205226	0.0647565	0.10827	0.18538	0.103164	0.0434732	0.275	0.0763052	0.240857	0.0714017	0.309816	0.049615
Greifensee	0.0530439	0.0338611	0.188348	0.0187089	0	0.180082	0.0820627	0.0814712	0.192325	0.0799581	0.0434328	0.273463	0.0788266	0.241374	0.068979	0.327081	0.0317928
Huron	0.190934	0.142212	0.0678122	0.205226	0.180082	0	0.222327	0.154777	0.324513	0.164933	0.228047	0.273516	0.263776	0.224281	0.189438	0.338447	0.166484
Klicava	0.121984	0.123117	0.22953	0.0647565	0.0820627	0.222327	0	0.143027	0.198952	0.15846	0.124628	0.248306	0.15264	0.226587	0.134329	0.168045	0.12781
Maggiore	0.098556	0.107939	0.141655	0.10827	0.0814712	0.154777	0.143027	0	0.271177	0.116048	0.0804966	0.233771	0.129338	0.208972	0.128581	0.294926	0.0655296
Medard	0.260369	0.267278	0.312475	0.18538	0.192325	0.324513	0.198952	0.271177	0	0.237542	0.277385	0.33148	0.285053	0.315335	0.281641	0.294656	0.282614
Milada	0.113503	0.0807548	0.160379	0.103164	0.0799581	0.164933	0.15846	0.116048	0.237542	0	0.125477	0.285182	0.128298	0.244998	0.129163	0.327734	0.0906197
Mondsee	0.0341604	0.0364945	0.233033	0.0434732	0.0434328	0.228047	0.124628	0.0804966	0.277385	0.125477	0	0.299253	0.0618308	0.27358	0.0543987	0.317669	0.0197714
Montoje	0.282131	0.288209	0.258332	0.275	0.273463	0.273516	0.248306	0.233771	0.33148	0.285182	0.299253	0	0.328539	0.163374	0.288739	0.297665	0.290027
Most	0.09317	0.086773	0.269282	0.0763052	0.0788266	0.263776	0.15264	0.129338	0.285053	0.128298	0.0618308	0.328539	0	0.304667	0.116843	0.345812	0.0724469
Simoncouche	0.253198	0.244202	0.201952	0.240857	0.241374	0.224281	0.226587	0.208972	0.315335	0.244998	0.27358	0.163374	0.304667	0	0.258576	0.302934	0.256269
Traunsee	0.0196881	0.0535063	0.202175	0.0714017	0.068979	0.189438	0.134329	0.128581	0.281641	0.129163	0.0543987	0.288739	0.116843	0.258576	0	0.318466	0.0566923
Zlutice	0.310891	0.323174	0.320732	0.309816	0.327081	0.338447	0.168045	0.294926	0.294656	0.327734	0.317669	0.297665	0.345812	0.302934	0.318466	0	0.331354
Zurich	0.040889	0.0112902	0.168925	0.049615	0.0317928	0.166484	0.12781	0.0655296	0.282614	0.0906197	0.0197714	0.290027	0.0724469	0.256269	0.0566923	0.331354	0
F. commune	Biwa	Klicava	Malawi	Medard	Milada	Most	Tanganyika	Tiete
Biwa	0	0.302169	0.295629	0.343096	0.391647	0.345961	0.286387	0.0122688
Klicava	0.302169	0	0.329818	0.309264	0.334924	0.327888	0.324016	0.269832
Malawi	0.295629	0.329818	0	0.380851	0.42422	0.385642	0.103653	0.307319
Medard	0.343096	0.309264	0.380851	0	0.0717873	0.084404	0.372525	0.33612
Milada	0.391647	0.334924	0.42422	0.0717873	0	0.0610652	0.412146	0.379122
Most	0.345961	0.327888	0.385642	0.084404	0.0610652	0	0.374417	0.336178
Tanganyika	0.286387	0.324016	0.103653	0.372525	0.412146	0.374417	0	0.302572
Tiete	0.0122688	0.269832	0.307319	0.33612	0.379122	0.336178	0.302572	0
F.africanum	Malawi	Tanganyika
Malawi	0	0.0922398
Tanganyika	0.0922398	0

## Sheet: S7_IBD_analysis
Supplementary Data 7: Metadata for isolation by distance analysis (IBD) and related statistics based on FST scores.
Species	Lake1	Lake2	Distance (km)		ISOLATION BY DISTANCE ANALYSIS
F. commune	Klicava	Biwa	8973.16
F. commune	Malawi	Biwa	11819.8		F. commune
F. commune	Medard	Biwa	9026.94		----------------------
F. commune	Milada	Biwa	8913.98		Total pairs: 28
F. commune	Most	Biwa	8950.78		Distance range: 38 - 18655 km
F. commune	Tanganyika	Biwa	11899.8
F. commune	Tiete	Biwa	18654.9		By geographic category:
F. commune	Malawi	Klicava	7161.51
F. commune	Medard	Klicava	94.9715		Local (<100 km) Within continent (>100 km) Between continents
F. commune	Milada	Klicava	70.4194		5 2 21
F. commune	Most	Klicava	53.6283
F. commune	Tanganyika	Klicava	6389.89		IBD Results:	slope	SE	P value	R²
F. commune	Tiete	Klicava	10073		All pairs: n=28	0.102	0.0395	0.015676	0.205
F. commune	Medard	Malawi	7212.65		Between continents: n=21	-1.0415	0.1911	2.9375e-05	0.61
F. commune	Milada	Malawi	7219.92		Local (<100 km): n=5	0.5118	0.7744	0.555921	0.127
F. commune	Most	Malawi	7215.12
F. commune	Tanganyika	Malawi	861.599		Mantel test (proper inference with permutation):
F. commune	Tiete	Malawi	8585.83		r=0.452	p=0.0055	lakes=8	pairs used=28
F. commune	Milada	Medard	119.84
F. commune	Most	Medard	81.6649		F. temperatum
F. commune	Tanganyika	Medard	6435.48		--------------------
F. commune	Tiete	Medard	10008		Total pairs: 136
F. commune	Most	Milada	38.2831		Distance range: 5 - 7112 km
F. commune	Tanganyika	Milada	6450.88
F. commune	Tiete	Milada	10125.7		By geographic category:
F. commune	Tanganyika	Most	6443.47
F. commune	Tiete	Most	10087.7		Local (<100 km) Within continent (>100 km) Between continents
F. commune	Tiete	Tanganyika	8324.92		15 69 52
F. temperatum	Constance	Attersee	327.743
F. temperatum	Erie	Attersee	7002.2		IBD Results:	slope	SE	p- value	R²
F. temperatum	Erken	Attersee	1372.73		All pairs: n=136	0.0776	0.0168	9.5124e-06	0.165
F. temperatum	Greifensee	Attersee	369.679		Within continent (>100 km): n=69	-0.1004	0.0746	0.183965	0.032
F. temperatum	Huron	Attersee	6873.1		Between continents: n=52	-0.1467	0.4348	0.737288	0.002
F. temperatum	Klicava	Attersee	243.944		Local (<100 km): n=15	0.2732	0.1371	0.047614	0.294
F. temperatum	Maggiore	Attersee	429.233
F. temperatum	Medard	Attersee	267.002		Mantel test (proper inference with permutation):
F. temperatum	Milada	Attersee	314.15		r=0.492	p=0.0127	lakes=17	pairs used=136
F. temperatum	Mondsee	Attersee	16.2141
F. temperatum	Montoje	Attersee	7108.75
F. temperatum	Most	Attersee	292.582		Statistical results for Isolation-by-Distance (IBD) ouliter analysis.
F. temperatum	Simoncouche	Attersee	5972.4
F. temperatum	Traunsee	Attersee	5.23688		Species	Geographic Category	Method	n	Slope	95% CI Lower	95% CI Upper	p-value
F. temperatum	Zlutice	Attersee	274.84		F. temperatum	All pairs	OLS (original)	136	0.078	0.044	0.111	9.51 x 10⁻⁶
F. temperatum	Zurich	Attersee	377.827			Local (<100 km)	OLS (original)	15	0.273	-0.023	0.569	0.068
F. temperatum	Erie	Constance	6740.63				Bootstrap	15	0.285	0.082	0.506	Significant
F. temperatum	Erken	Constance	1489.69			Within continent (>100 km)	OLS (original)	57	-0.1	-0.25	0.049	0.184
F. temperatum	Greifensee	Constance	49.5827			Between continents	OLS (original)	48	-0.147	-1.022	0.728	0.737
F. temperatum	Huron	Constance	6622.87		F. commune	All pairs	OLS (original)	28	0.102	0.021	0.183	0.016
F. temperatum	Klicava	Constance	437.738			Local (<100 km)	OLS (original)	5	0.512	-1.953	2.976	0.556
F. temperatum	Maggiore	Constance	193.265			Within continent (>100 km)	Not Applicable (n<3)	-	-	-	-	-
F. temperatum	Medard	Constance	377.56			Between continents	OLS (original)	21	-1.042	-1.442	-0.642	2.94 x 10⁻⁵
F. temperatum	Milada	Constance	491.839				OLS no outliers (n=20)	20	-0.677	-1.157	-0.197	0.008
F. temperatum	Mondsee	Constance	313.244				Robust (MM)	21	-1.03	-1.606	-0.455	0.002
F. temperatum	Montoje	Constance	6889.12				Bootstrap	21	-0.959	-1.392	-0.394	Significant
F. temperatum	Most	Constance	454.423
F. temperatum	Simoncouche	Constance	5713.53
F. temperatum	Traunsee	Constance	332.974
F. temperatum	Zlutice	Constance	417.65
F. temperatum	Zurich	Constance	67.6086
F. temperatum	Erken	Erie	6562.76
F. temperatum	Greifensee	Erie	6725.43
F. temperatum	Huron	Erie	333.314
F. temperatum	Klicava	Erie	6890.79
F. temperatum	Maggiore	Erie	6806.18
F. temperatum	Medard	Erie	6803.58
F. temperatum	Milada	Erie	6865.05
F. temperatum	Mondsee	Erie	6994.73
F. temperatum	Montoje	Erie	1079.28
F. temperatum	Most	Erie	6847.38
F. temperatum	Simoncouche	Erie	1031.18
F. temperatum	Traunsee	Erie	7006.54
F. temperatum	Zlutice	Erie	6830.1
F. temperatum	Zurich	Erie	6733.26
F. temperatum	Greifensee	Erken	1533.37
F. temperatum	Huron	Erken	6366.22
F. temperatum	Klicava	Erken	1130.32
F. temperatum	Maggiore	Erken	1681
F. temperatum	Medard	Erken	1140.28
F. temperatum	Milada	Erken	1059.94
F. temperatum	Mondsee	Erken	1383.35
F. temperatum	Montoje	Erken	6427.47
F. temperatum	Most	Erken	1086.55
F. temperatum	Simoncouche	Erken	5551.04
F. temperatum	Traunsee	Erken	1371.64
F. temperatum	Zlutice	Erken	1113.51
F. temperatum	Zurich	Erken	1554.42
F. temperatum	Huron	Greifensee	6610.36
F. temperatum	Klicava	Greifensee	487.313
F. temperatum	Maggiore	Greifensee	156.758
F. temperatum	Medard	Greifensee	426.564
F. temperatum	Milada	Greifensee	541.282
F. temperatum	Mondsee	Greifensee	354.653
F. temperatum	Montoje	Greifensee	6883.16
F. temperatum	Most	Greifensee	503.8
F. temperatum	Simoncouche	Greifensee	5699.19
F. temperatum	Traunsee	Greifensee	374.877
F. temperatum	Zlutice	Greifensee	466.936
F. temperatum	Zurich	Greifensee	21.4597
F. temperatum	Klicava	Huron	6750.1
F. temperatum	Maggiore	Huron	6698.59
F. temperatum	Medard	Huron	6665.06
F. temperatum	Milada	Huron	6720.87
F. temperatum	Mondsee	Huron	6866.43
F. temperatum	Montoje	Huron	795.685
F. temperatum	Most	Huron	6705.06
F. temperatum	Simoncouche	Huron	932.057
F. temperatum	Traunsee	Huron	6877.28
F. temperatum	Zlutice	Huron	6689.62
F. temperatum	Zurich	Huron	6619.3
F. temperatum	Maggiore	Klicava	601.279
F. temperatum	Medard	Klicava	94.9715
F. temperatum	Milada	Klicava	70.4194
F. temperatum	Mondsee	Klicava	253.559
F. temperatum	Montoje	Klicava	6958.43
F. temperatum	Most	Klicava	53.6283
F. temperatum	Simoncouche	Klicava	5859.67
F. temperatum	Traunsee	Klicava	243.428
F. temperatum	Zlutice	Klicava	60.726
F. temperatum	Zurich	Klicava	503.933
F. temperatum	Medard	Maggiore	555.622
F. temperatum	Milada	Maggiore	662.556
F. temperatum	Mondsee	Maggiore	413.019
F. temperatum	Montoje	Maggiore	6987.85
F. temperatum	Most	Maggiore	626.929
F. temperatum	Simoncouche	Maggiore	5782.82
F. temperatum	Traunsee	Maggiore	433.864
F. temperatum	Zlutice	Maggiore	592.081
F. temperatum	Zurich	Maggiore	135.627
F. temperatum	Milada	Medard	119.84
F. temperatum	Mondsee	Medard	271.394
F. temperatum	Montoje	Medard	6879.98
F. temperatum	Most	Medard	81.6649
F. temperatum	Simoncouche	Medard	5772.58
F. temperatum	Traunsee	Medard	268.364
F. temperatum	Zlutice	Medard	44.1933
F. temperatum	Zurich	Medard	445.125
F. temperatum	Mondsee	Milada	323.943
F. temperatum	Montoje	Milada	6920.71
F. temperatum	Most	Milada	38.2831
F. temperatum	Simoncouche	Milada	5833.87
F. temperatum	Traunsee	Milada	313.518
F. temperatum	Zlutice	Milada	76.0531
F. temperatum	Zurich	Milada	559
F. temperatum	Montoje	Mondsee	7104.1
F. temperatum	Most	Mondsee	301.018
F. temperatum	Simoncouche	Mondsee	5965.07
F. temperatum	Traunsee	Mondsee	20.9628
F. temperatum	Zlutice	Mondsee	281.638
F. temperatum	Zurich	Mondsee	362.492
F. temperatum	Most	Montoje	6909.83
F. temperatum	Simoncouche	Montoje	1494.4
F. temperatum	Traunsee	Montoje	7112.47
F. temperatum	Zlutice	Montoje	6899.26
F. temperatum	Zurich	Montoje	6894.64
F. temperatum	Simoncouche	Most	5816.22
F. temperatum	Traunsee	Most	292.499
F. temperatum	Zlutice	Most	37.77
F. temperatum	Zurich	Most	521.704
F. temperatum	Traunsee	Simoncouche	5976.71
F. temperatum	Zlutice	Simoncouche	5798.99
F. temperatum	Zurich	Simoncouche	5707.41
F. temperatum	Zlutice	Traunsee	275.375
F. temperatum	Zurich	Traunsee	382.985
F. temperatum	Zurich	Zlutice	485.045

## Sheet: S8_MAF_threshold
Supplementary Data 8: Relationship between ecosystem age and minor allele frequency (MAF) threshold.
F.temperatum
Lake	Lake age (approximate years)	Lake type	n_SNPs	frac_0.2_0.4	frac_0.2_0.5	frac_0.4_0.5
Maggiore	15000	Post-glacial	212725	30.4	42.4	12
Zurich	15000	Post-glacial	348487	27.6	37.7	10.2
Greifensee	15000	Post-glacial	105122	27.3	36.2	8.9
Traunsee	15000	Post-glacial	175768	27.2	37.2	10
Attersee	15000	Post-glacial	199706	27.1	37.2	10.1
Constance	15000	Post-glacial	178013	26.5	36.1	9.6
Mondsee	15000	Post-glacial	80555	26.1	36.4	10.3
Montoje	15000	Post-glacial	118820	33.9	47.9	14
Simmonouche	15000	Post-glacial	214236	32.8	46.1	13.3
Huron	15000	Post-glacial	295378	29.6	40.7	11.2
Erken	15000	Post-glacial	226367	29.2	38.7	9.4
Erie	15000	Post-glacial	51354	29.5	40.2	10.7
Zlutice	56	Reservoir	90589	30.3	42.1	11.8
Klicava	70	Reservoir	591595	30	42.3	12.3
Most	17	Post-mining	215925	25.3	34.9	9.6
Medard	15	Post-mining	102975	31.7	44.4	12.7
Milada	24	Post-mining	147818	30.9	42.3	11.4
F.commune
Lake	Lake age (approximate years)	Lake type	n_SNPs	frac_0.2_0.4	frac_0.2_0.5	frac_0.4_0.5
Tanganyika	10000000	Ancient	953334	27	37.3	10.3
Malawi	2000000	Ancient	546339	23.1	30.5	7.5
F.africanum
Lake	Lake age (approximate years)	Lake type	n_SNPs	frac_0.2_0.4	frac_0.2_0.5	frac_0.4_0.5
Tanganyika	10000000	Ancient	554801	30.3	42.8	12.5
Biwa	4000000	Ancient	175814	28.1	38.8	10.7
Malawi	2000000	Ancient	355271	25.9	35.8	9.9
Klicava	70	Reservoir	47912	37.6	53.4	15.8
Tiete	60	Reservoir	113069	27.3	37.4	10.1
Most	17	Post-mining	156865	29.6	41.4	11.8
Medard	15	Post-mining	103309	29.9	41.7	11.8
Milada	24	Post-mining	83294	29.5	40.1	10.6

## Sheet: S9_pN_pS ratios
Supplementary Data 9: pN/pS ratios and underlying polymorphism counts for all species and lake populations.
Lake	n_total_nonsynonymous	n_total_synonymous	total_snps	pN_pS_genome_wide	pN_pS_int
F.temperatum
Maggiore	45263	160398	205661	0.282192	0.25268
Attersee	40902	151723	192625	0.269583	0.232116
Klicava	121515	451472	572987	0.269153	0.236677
Traunsee	35827	133690	169517	0.267986	0.235826
Most	43499	165626	209125	0.262634	0.216161
Constance	35676	136011	171687	0.262302	0.223076
Montoje	23674	91227	114901	0.259507	0.242114
Greifensee	20683	80830	101513	0.255883	0.224301
Mondsee	15718	62155	77873	0.252884	0.223055
Zurich	67580	269292	336872	0.250954	0.220019
Milada	28322	114869	143191	0.246559	0.214145
Simonouche	40211	167043	207254	0.240722	0.220579
Medard	18904	79902	98806	0.23659	0.22297
Erken	41838	177409	219247	0.235828	0.201003
Erie	9280	40448	49728	0.22943	0.200161
Huron	52231	234251	286482	0.22297	0.19438
Zlutice	15377	72419	87796	0.212334	0.18872
F.commune
Malawi	98380	243713	342093	0.403672	0.312759
Tanganyika	147551	385792	533343	0.382463	0.315172
Medard	18658	80169	98827	0.232733	0.206132
Biwa	31690	139159	170849	0.227725	0.187517
Most	27084	123201	150285	0.219836	0.199403
Milada	14373	65587	79960	0.219144	0.198125
Tiete	19745	90472	110217	0.218244	0.183601
Klicava	7347	37905	45252	0.193827	0.188282
F.africanum
Malawi	142628	373562	516190	0.381805	0.30457
Tanganyika	236301	660815	897116	0.35759	0.298091
*pN_pS_genome_wide: The genome-wide pN/pS ratio, calculated as the simple ratio of the total counts (n_total_nonsynonymous / n_total_synonymous)
*pN_pS_int: The pN/pS ratio calculated exclusively on the subset of SNPs at intermediate allele frequencies (Minor Allele Frequency 0.2–0.4)
